# Supplementary material for: Microbiota identified from preserved Anopheles
Source: Springer Nature journal article supplement (doi:10.1186/s12936-021-03754-7), 2021-05-22

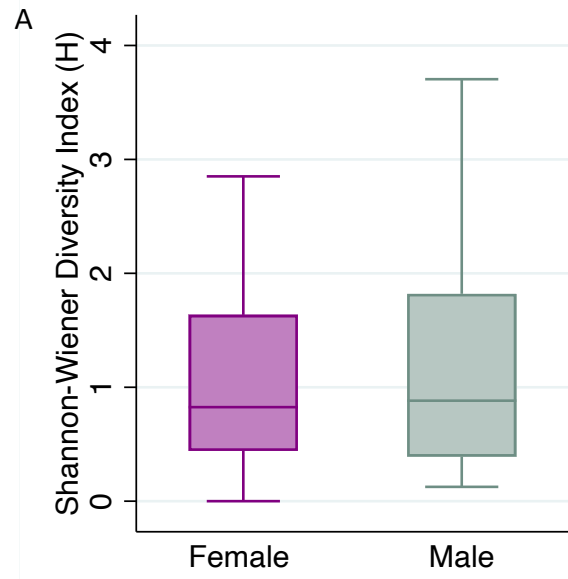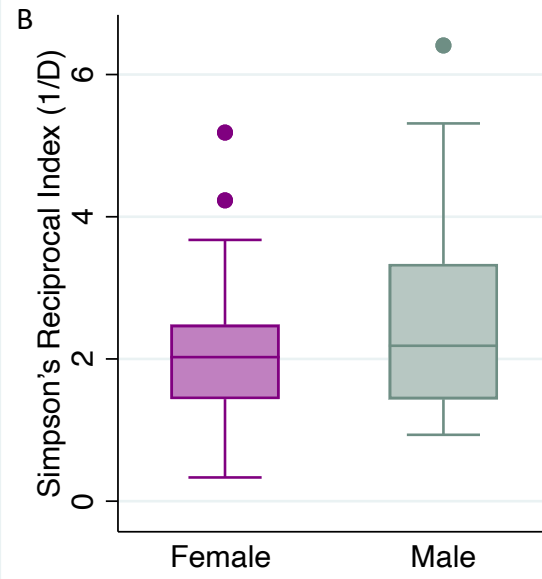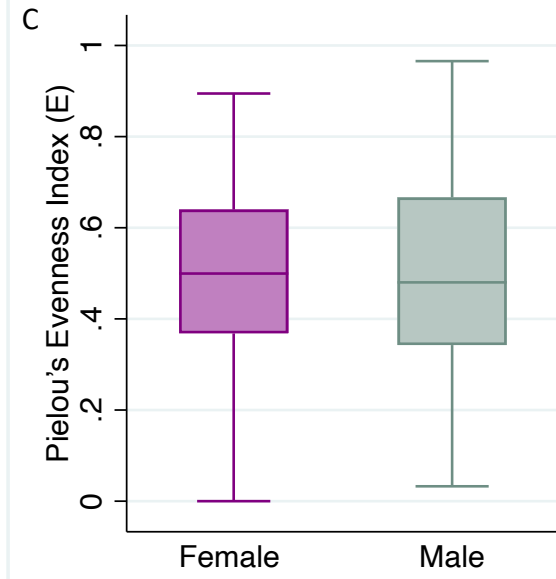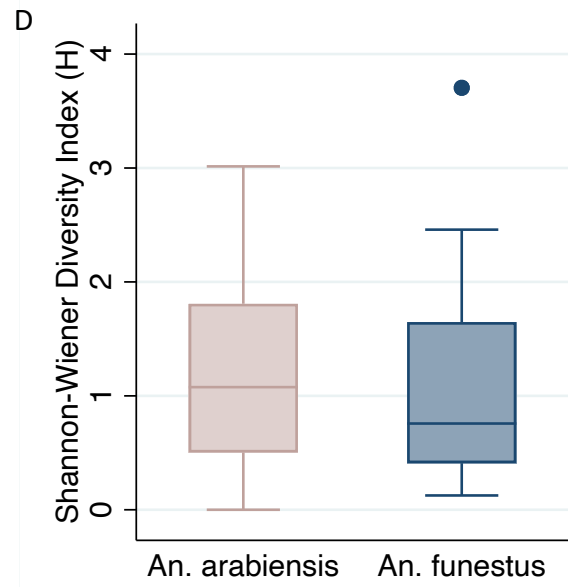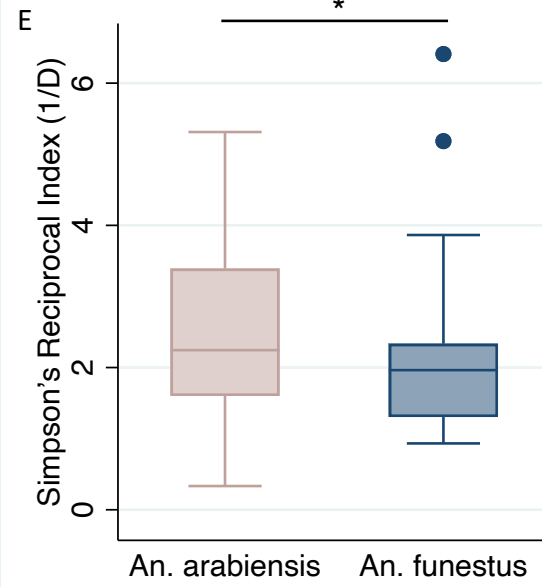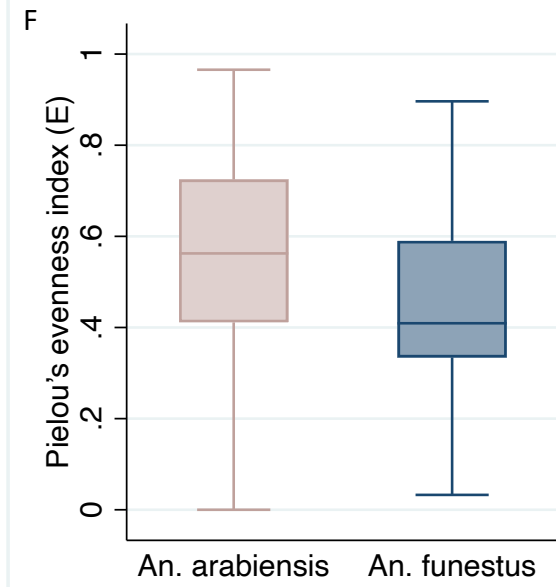

Supplement: MOESM13 [file 19188152]
