# Supplementary material for: Microbiota identified from preserved Anopheles
Source: Malar J. 2021 May 22;20:230. doi: 10.1186/s12936-021-03754-7 (PMC8141131; doi:10.1186/s12936-021-03754-7)
Supplement: Supplementary file 1 — Additional file 1. OTUs with taxonomic assignment identified by culture-independent techniques. Samples have coded names: females are labelled ‘F.’, and males are labelled ‘M.’; larval rearing water is labelled ‘H2O’; An. arabiensis are labelled ‘Arab’, and An. funestus are labelled ‘Fun’; silica-preserved samples are labelled ‘S’, and RNAlater®-preserved samples are labelled ‘R’; and samples preserved for 4 weeks begin with ‘1’, while samples preserved for 12 weeks begin with ‘3’. Each code ends with a number, either 1, 2 or 3, which denotes replicate numbers per group. [file 12936_2021_3754_MOESM1_ESM.xlsx]

## Sheet: Sheet1
Group	Organism	Kingdom	Phylum	Class	Order	Family	Genus	Species	Score	Hit	Accession_Number_1	Accession_Number_2	Accession_Number_3	1ArabFR.1	1ArabFR.2	1ArabFR.3	1ArabFS.1	1ArabFS.2	1ArabFS.3	1ArabMR.1	1ArabMR.2	1ArabMR.3	1ArabMS.1	1ArabMS.2	1ArabMS.3	1FunFR.1	1FunFR.2	1FunFR.3	1FunFS.1	1FunFS.2	1FunFS.3	1FunMR.1	1FunMR.2	1FunMR.3	1FunMS.1	1FunMS.2	1FunMS.3	3ArabFR.1	3ArabFR.2	3ArabFR.3	3ArabFS.1	3ArabFS.2	3ArabFS.3	3ArabMR.1	3ArabMR.2	3ArabMR.3	3ArabMS.1	3ArabMS.2	3ArabMS.3
denovo0	Bacteria; __Proteobacteria; __Gammaproteobacteria; __Enterobacterales; __Yersiniaceae; __Serratia; __Serratia oryzae	Bacteria	__Proteobacteria	__Gammaproteobacteria	__Enterobacterales	__Yersiniaceae	__Serratia	__Serratia oryzae	1	1	NR_157762.1	NA	NA	18642	5391	4177	22529	39722	43794	20274	6680	334	31483	18394	23977	9311	839	0	6044	8417	3311	285	129	33	2335	44819	28639	13929	5825	14396	2096	16840	2505	27536	6062	11117	2860	27008	9120
denovo1	Bacteria; __Proteobacteria; __Alphaproteobacteria; __Rhodospirillales; __Acetobacteraceae; __Asaia; __Asaia krungthepensis	Bacteria	__Proteobacteria	__Alphaproteobacteria	__Rhodospirillales	__Acetobacteraceae	__Asaia	__Asaia krungthepensis	1	1	NR_113878.1	NA	NA	100	7749	3652	3	0	7	174	19343	17586	0	0	2	6	20	209	5	0	0	57	0	0	11466	0	0	3240	1490	1186	1276	2574	11725	2513	2768	1980	14263	5555	12603
denovo2	Bacteria; __Proteobacteria; __Alphaproteobacteria; __Rhizobiales; __Phyllobacteriaceae; __Phyllobacterium; __Phyllobacterium myrsinacearum	Bacteria	__Proteobacteria	__Alphaproteobacteria	__Rhizobiales	__Phyllobacteriaceae	__Phyllobacterium	__Phyllobacterium myrsinacearum	1	1	NR_113874.1	NA	NA	2211	0	0	139	4	1	5862	0	0	3018	14	6927	18467	25253	0	259	3	603	0	25337	25886	13	27	5652	1465	553	389	13	8	137	284	863	1361	104	15	166
denovo3	Bacteria; __Bacteroidetes; __Flavobacteriia; __Flavobacteriales; __Flavobacteriaceae; __Elizabethkingia; __Elizabethkingia anophelis	Bacteria	__Bacteroidetes	__Flavobacteriia	__Flavobacteriales	__Flavobacteriaceae	__Elizabethkingia	__Elizabethkingia anophelis	1	1	NR_136481.1	NA	NA	579	4508	322	1	5	5	828	19245	10746	1	0	627	482	395	0	0	1	0	0	8	1	0	9	0	1070	1963	701	235	682	5608	8347	16742	4628	42047	9466	11251
denovo4	Bacteria; __Proteobacteria; __Gammaproteobacteria; __Pseudomonadales; __Pseudomonadaceae; __Pseudomonas; __Pseudomonas veronii	Bacteria	__Proteobacteria	__Gammaproteobacteria	__Pseudomonadales	__Pseudomonadaceae	__Pseudomonas	__Pseudomonas veronii	1	1	NR_028706.1	NA	NA	7170	19	0	14328	24	10	4340	0	0	4	23717	4	1408	627	0	14465	31754	19748	0	44	20	0	112	4	2942	5102	1117	21	26	402	788	1243	1946	321	64	808
denovo5	Bacteria; __Proteobacteria; __Gammaproteobacteria; __Aeromonadales; __Aeromonadaceae; __Aeromonas; __Aeromonas hydrophila	Bacteria	__Proteobacteria	__Gammaproteobacteria	__Aeromonadales	__Aeromonadaceae	__Aeromonas	__Aeromonas hydrophila	1	1	NR_074841.1	NA	NA	135	1	0	0	0	0	288	145	0	0	0	0	150	27	0	0	0	0	75927	7	0	0	0	0	1852	229	48	5	4	22	48	110	1217	216	21	371
denovo6	Bacteria; __Proteobacteria; __Gammaproteobacteria; __Enterobacterales; __Enterobacteriaceae; __Enterobacter; __Enterobacter cloacae	Bacteria	__Proteobacteria	__Gammaproteobacteria	__Enterobacterales	__Enterobacteriaceae	__Enterobacter	__Enterobacter cloacae	1	1	NR_118568.1	NA	NA	886	15794	35965	205	1	51	464	396	27	1	51	0	3126	38	2222	105	259	4	84	14	1	1300	0	0	1587	25422	29030	25973	12079	2460	272	415	860	686	1230	344
denovo7	; __; __; __; __; __; __		__	__	__	__	__	__	1	1	NA	NA	NA	3	0	0	0	0	0	33	0	0	0	0	0	0	0	0	0	0	0	0	0	0	0	0	0	0	1	0	0	0	4	0	0	189	5	0	0
denovo8	Bacteria; __Bacteroidetes; __Sphingobacteriia; __Sphingobacteriales; __Sphingobacteriaceae; __Pedobacter; __Pedobacter solisilvae	Bacteria	__Bacteroidetes	__Sphingobacteriia	__Sphingobacteriales	__Sphingobacteriaceae	__Pedobacter	__Pedobacter solisilvae	1	1	NR_159137.1	NA	NA	0	0	0	0	0	0	0	0	0	0	0	0	0	0	504	0	0	0	0	4	0	0	0	0	0	0	0	0	0	0	0	0	104	2	0	0
denovo9	Bacteria; __Actinobacteria; __Actinobacteria; __Micrococcales; __Microbacteriaceae; __Microbacterium; __Microbacterium maritypicum	Bacteria	__Actinobacteria	__Actinobacteria	__Micrococcales	__Microbacteriaceae	__Microbacterium	__Microbacterium maritypicum	1	1	NR_114986.1	NA	NA	6687	6	20	1	0	13	3588	3	11	0	1	27	21	1	2	0	0	0	0	1	0	119	0	0	75	30	14	2	2534	15004	265	23544	3398	34	383	84
denovo10	Bacteria; __Proteobacteria; __Gammaproteobacteria; __Pseudomonadales; __Pseudomonadaceae; __Pseudomonas; __Pseudomonas lactis	Bacteria	__Proteobacteria	__Gammaproteobacteria	__Pseudomonadales	__Pseudomonadaceae	__Pseudomonas	__Pseudomonas lactis	1	1	NR_156986.1	NA	NA	0	1355	47	0	0	0	11	3220	3823	0	0	0	0	0	5610	1	0	2	336	0	0	4088	0	0	0	0	0	0	0	0	6	67	35	10	0	0
denovo11	Bacteria; __Proteobacteria; __Gammaproteobacteria; __Xanthomonadales; __Xanthomonadaceae; __; __[Pseudomonas] geniculata	Bacteria	__Proteobacteria	__Gammaproteobacteria	__Xanthomonadales	__Xanthomonadaceae	__	__[Pseudomonas] geniculata	1	1	NR_024708.1	NA	NA	4961	0	0	16	9	4	1273	0	0	8	2	3	2599	325	0	6371	3	6985	0	8	4	0	13	0	1267	1550	726	6	4	45	335	159	505	71	4	201
denovo12	Bacteria; __Actinobacteria; __Actinobacteria; __Micrococcales; __Microbacteriaceae; __Leucobacter; __Leucobacter iarius	Bacteria	__Actinobacteria	__Actinobacteria	__Micrococcales	__Microbacteriaceae	__Leucobacter	__Leucobacter iarius	1	1	NR_042414.1	NA	NA	18	0	0	0	0	0	2110	597	98	0	0	0	11	10	16746	0	0	34	39	1	0	46	0	0	2076	64	63	682	1	5	20	108	114	57	31	31
denovo13	Bacteria; __Firmicutes; __Bacilli; __Lactobacillales; __Streptococcaceae; __Streptococcus; __Streptococcus thermophilus	Bacteria	__Firmicutes	__Bacilli	__Lactobacillales	__Streptococcaceae	__Streptococcus	__Streptococcus thermophilus	1	1	NR_042778.1	NA	NA	988	428	988	0	1	1	108	757	1082	0	0	0	45	8	5420	0	0	0	1	0	0	1787	0	0	369	597	342	2	0	5	53	95	424	177	39	108
denovo14	Bacteria; __Proteobacteria; __Gammaproteobacteria; __Enterobacterales; __Yersiniaceae; __Yersinia; __Yersinia aldovae	Bacteria	__Proteobacteria	__Gammaproteobacteria	__Enterobacterales	__Yersiniaceae	__Yersinia	__Yersinia aldovae	1	1	NR_041831.1	NA	NA	31	81	688	0	0	0	43	1444	200	0	28	0	1	3	0	1	0	0	75	0	0	0	0	0	114	88	1890	202	38	4	4506	26	112	307	14	589
denovo15	Bacteria; __Proteobacteria; __Betaproteobacteria; __Burkholderiales; __Burkholderiaceae; __Polynucleobacter; __Polynucleobacter sinensis	Bacteria	__Proteobacteria	__Betaproteobacteria	__Burkholderiales	__Burkholderiaceae	__Polynucleobacter	__Polynucleobacter sinensis	1	1	NR_151920.1	NA	NA	0	0	0	0	0	0	0	0	0	0	0	0	0	0	0	0	0	0	0	0	0	0	0	0	0	0	0	0	0	0	10	0	0	0	0	0
denovo16	Bacteria; __Proteobacteria; __Alphaproteobacteria; __Rhodospirillales; __Acetobacteraceae; __Gluconobacter; __Gluconobacter frateurii	Bacteria	__Proteobacteria	__Alphaproteobacteria	__Rhodospirillales	__Acetobacteraceae	__Gluconobacter	__Gluconobacter frateurii	1	1	NR_118193.1	NA	NA	0	74	76	12	1	0	1	52	0	0	0	0	0	0	192	0	0	0	0	1	0	1053	0	0	0	0	0	181	120	909	13	0	17	129	869	0
denovo17	Bacteria; __Firmicutes; __Bacilli; __Bacillales; __Staphylococcaceae; __Staphylococcus; __Staphylococcus epidermidis	Bacteria	__Firmicutes	__Bacilli	__Bacillales	__Staphylococcaceae	__Staphylococcus	__Staphylococcus epidermidis	1	1	NR_113957.1	NA	NA	167	1288	572	2	0	0	175	404	808	0	0	0	21	32	6922	0	0	0	85	0	2	1511	0	0	6023	86	711	0	1	25	99	224	1200	109	5	27
denovo18	; __; __; __; __; __; __		__	__	__	__	__	__	1	1	NA	NA	NA	173	62	325	1	0	1	561	638	904	0	1	0	61	2	300	0	0	0	29	1	0	113	0	0	464	434	462	1	3	12	43	112	709	21	2	260
denovo19	Bacteria; __Bacteroidetes; __Cytophagia; __Cytophagales; __Cytophagaceae; __Fibrella; __Fibrella aestuarina	Bacteria	__Bacteroidetes	__Cytophagia	__Cytophagales	__Cytophagaceae	__Fibrella	__Fibrella aestuarina	1	1	NR_102471.1	NA	NA	0	0	0	0	0	0	0	0	0	0	0	0	0	0	0	0	0	0	0	0	0	0	0	0	0	0	0	0	0	0	0	0	0	0	0	0
denovo20	Bacteria; __Proteobacteria; __Betaproteobacteria; __Burkholderiales; __Oxalobacteraceae; __Herbaspirillum; __Herbaspirillum huttiense	Bacteria	__Proteobacteria	__Betaproteobacteria	__Burkholderiales	__Oxalobacteraceae	__Herbaspirillum	__Herbaspirillum huttiense	1	1	NR_114139.1	NA	NA	99	0	0	0	0	0	200	0	0	0	0	0	33	54	0	0	0	0	0	4	0	0	2	0	288	550	106	2	0	2	287	107	699	88	3	181
denovo21	Bacteria; __Actinobacteria; __Actinobacteria; __Corynebacteriales; __Corynebacteriaceae; __Corynebacterium; __Corynebacterium pseudodiphtheriticum	Bacteria	__Actinobacteria	__Actinobacteria	__Corynebacteriales	__Corynebacteriaceae	__Corynebacterium	__Corynebacterium pseudodiphtheriticum	1	1	NR_042137.1	NA	NA	43	320	215	0	0	0	0	175	204	0	0	0	9	0	2123	0	0	0	19	0	0	1813	0	0	47	104	6	0	0	4	0	83	0	28	11	139
denovo22	Bacteria; __Firmicutes; __Bacilli; __Lactobacillales; __Streptococcaceae; __Streptococcus; __Streptococcus periodonticum	Bacteria	__Firmicutes	__Bacilli	__Lactobacillales	__Streptococcaceae	__Streptococcus	__Streptococcus periodonticum	1	1	NR_165747.1	NA	NA	60	194	542	1	0	0	106	307	434	0	0	0	100	8	1038	0	0	0	89	0	0	2358	0	0	244	21	266	0	0	5	0	119	611	4	3	46
denovo23	Bacteria; __Proteobacteria; __Alphaproteobacteria; __Rhodospirillales; __; __Reyranella; __Reyranella aquatilis	Bacteria	__Proteobacteria	__Alphaproteobacteria	__Rhodospirillales	__	__Reyranella	__Reyranella aquatilis	1	1	NR_158037.1	NA	NA	0	0	0	0	0	0	47	0	0	0	0	0	0	0	0	0	0	0	0	0	0	0	0	0	0	0	0	0	0	0	0	0	195	0	0	0
denovo24	Bacteria; __Firmicutes; __Bacilli; __Lactobacillales; __Carnobacteriaceae; __Dolosigranulum; __Dolosigranulum pigrum	Bacteria	__Firmicutes	__Bacilli	__Lactobacillales	__Carnobacteriaceae	__Dolosigranulum	__Dolosigranulum pigrum	1	1	NR_113774.1	NA	NA	34	149	201	0	0	0	0	57	381	0	0	0	3	0	1522	0	0	0	0	0	0	2757	0	0	0	134	140	0	0	2	0	217	68	58	44	0
denovo25	Bacteria; __Proteobacteria; __Alphaproteobacteria; __Sphingomonadales; __Sphingomonadaceae; __Novosphingobium; __Novosphingobium nitrogenifigens	Bacteria	__Proteobacteria	__Alphaproteobacteria	__Sphingomonadales	__Sphingomonadaceae	__Novosphingobium	__Novosphingobium nitrogenifigens	1	1	NR_043857.1	NA	NA	2	0	0	0	0	0	0	0	0	0	0	0	0	0	0	0	0	0	0	0	0	0	0	0	0	0	0	0	0	0	0	0	0	0	0	0
denovo26	Bacteria; __Proteobacteria; __Alphaproteobacteria; __Rhizobiales; __Rhizobiaceae; __Kaistia; __Kaistia terrae	Bacteria	__Proteobacteria	__Alphaproteobacteria	__Rhizobiales	__Rhizobiaceae	__Kaistia	__Kaistia terrae	1	1	NR_108222.1	NA	NA	0	0	0	0	0	0	0	0	0	0	0	0	0	0	176	0	0	0	0	0	0	0	0	0	0	0	0	0	0	6	0	0	324	7	0	0
denovo27	Bacteria; __Proteobacteria; __Gammaproteobacteria; __Pseudomonadales; __Moraxellaceae; __Moraxella; __Moraxella osloensis	Bacteria	__Proteobacteria	__Gammaproteobacteria	__Pseudomonadales	__Moraxellaceae	__Moraxella	__Moraxella osloensis	1	1	NR_113392.1	NA	NA	17	138	154	0	0	0	26	341	20	0	0	0	34	2	1659	0	1	0	0	3	0	556	0	0	171	222	120	1	0	19	81	76	424	24	3	177
denovo28	Bacteria; __Actinobacteria; __Actinobacteria; __Propionibacteriales; __Propionibacteriaceae; __Cutibacterium; __Cutibacterium acnes	Bacteria	__Actinobacteria	__Actinobacteria	__Propionibacteriales	__Propionibacteriaceae	__Cutibacterium	__Cutibacterium acnes	1	1	NR_040847.1	NA	NA	157	364	447	0	0	0	146	120	387	0	1	0	72	25	1524	0	0	0	13	3	0	839	1	0	412	225	382	4	0	8	56	166	688	49	4	185
denovo29	Bacteria; __Proteobacteria; __Betaproteobacteria; __Burkholderiales; __Burkholderiaceae; __Cupriavidus; __Cupriavidus numazuensis	Bacteria	__Proteobacteria	__Betaproteobacteria	__Burkholderiales	__Burkholderiaceae	__Cupriavidus	__Cupriavidus numazuensis	1	1	NR_113877.1	NA	NA	0	0	0	0	0	0	0	0	0	0	0	0	0	0	0	0	0	0	0	0	0	0	0	0	0	0	0	0	0	0	0	0	0	0	0	0
denovo30	Bacteria; __Proteobacteria; __Alphaproteobacteria; __Rhizobiales; __Hyphomicrobiaceae; __Devosia; __Devosia insulae	Bacteria	__Proteobacteria	__Alphaproteobacteria	__Rhizobiales	__Hyphomicrobiaceae	__Devosia	__Devosia insulae	1	1	NR_044036.1	NA	NA	0	0	0	0	0	0	0	0	0	0	0	0	0	0	0	0	0	0	0	0	0	0	0	0	0	0	0	0	0	0	0	0	0	0	0	0
denovo31	Bacteria; __Bacteroidetes; __Cytophagia; __Cytophagales; __Cytophagaceae; __Siphonobacter; __Siphonobacter aquaeclarae	Bacteria	__Bacteroidetes	__Cytophagia	__Cytophagales	__Cytophagaceae	__Siphonobacter	__Siphonobacter aquaeclarae	1	1	NR_116562.1	NA	NA	0	0	0	0	0	0	0	0	0	0	0	0	0	0	0	0	0	0	0	0	0	0	0	0	0	0	0	0	0	0	0	0	0	0	0	0
denovo32	Bacteria; __Proteobacteria; __Gammaproteobacteria; __Pseudomonadales; __Moraxellaceae; __Psychrobacter; __Psychrobacter faecalis	Bacteria	__Proteobacteria	__Gammaproteobacteria	__Pseudomonadales	__Moraxellaceae	__Psychrobacter	__Psychrobacter faecalis	1	1	NR_118025.1	NA	NA	137	0	0	0	0	2	119	0	0	0	0	0	71	9	0	0	0	0	0	5	0	0	1	0	1158	43	328	0	1	1	159	154	245	95	2	136
denovo33	Bacteria; __Proteobacteria; __Gammaproteobacteria; __Pseudomonadales; __Moraxellaceae; __Acinetobacter; __Acinetobacter lwoffii	Bacteria	__Proteobacteria	__Gammaproteobacteria	__Pseudomonadales	__Moraxellaceae	__Acinetobacter	__Acinetobacter lwoffii	1	1	NR_113346.1	NA	NA	0	79	0	0	0	0	175	363	460	0	0	0	0	0	708	0	0	0	43	0	0	223	0	0	0	0	0	1	0	21	0	0	0	4	2	97
denovo34	Bacteria; __Firmicutes; __Bacilli; __Lactobacillales; __Lactobacillaceae; __Lactobacillus; __Lactobacillus crispatus	Bacteria	__Firmicutes	__Bacilli	__Lactobacillales	__Lactobacillaceae	__Lactobacillus	__Lactobacillus crispatus	1	1	NR_119274.1	NA	NA	10	63	1255	0	0	0	15	32	247	0	0	0	15	0	1659	0	0	0	0	0	0	344	0	0	0	0	569	0	0	0	0	12	0	0	2	0
denovo35	Bacteria; __Proteobacteria; __Alphaproteobacteria; __Rhodospirillales; __Rhodospirillaceae; __Taonella; __Taonella mepensis	Bacteria	__Proteobacteria	__Alphaproteobacteria	__Rhodospirillales	__Rhodospirillaceae	__Taonella	__Taonella mepensis	1	1	NR_132292.1	NA	NA	0	0	0	0	0	0	0	0	0	0	0	0	0	0	0	0	0	0	0	0	0	0	0	0	0	0	0	0	0	0	0	0	0	0	0	0
denovo36	Bacteria; __Cyanobacteria; __; __Oscillatoriales; __Oscillatoriaceae; __Aerosakkonema; __Aerosakkonema funiforme	Bacteria	__Cyanobacteria	__	__Oscillatoriales	__Oscillatoriaceae	__Aerosakkonema	__Aerosakkonema funiforme	1	1	NR_114306.1	NA	NA	33	35	58	0	0	0	42	255	104	0	0	0	14	8	30	0	0	0	0	1	0	1017	0	0	2593	56	0	0	0	2	18	135	350	11	6	9
denovo37	Bacteria; __Actinobacteria; __Actinobacteria; __Corynebacteriales; __; __Lawsonella; __Lawsonella clevelandensis	Bacteria	__Actinobacteria	__Actinobacteria	__Corynebacteriales	__	__Lawsonella	__Lawsonella clevelandensis	1	1	NR_151867.1	NA	NA	17	80	115	0	0	0	76	84	154	0	0	0	5	0	507	0	0	0	34	0	0	706	0	0	0	0	22	1	0	0	6	40	78	27	4	0
denovo38	Bacteria; __Proteobacteria; __Alphaproteobacteria; __Rhizobiales; __Rhizobiaceae; __Rhizobium; __Rhizobium endophyticum	Bacteria	__Proteobacteria	__Alphaproteobacteria	__Rhizobiales	__Rhizobiaceae	__Rhizobium	__Rhizobium endophyticum	1	1	NR_116477.1	NA	NA	5	2	22	0	0	0	0	0	0	0	0	0	4	0	105	0	0	0	0	0	0	224	0	0	24	56	0	0	0	0	0	0	187	0	0	0
denovo39	Bacteria; __Proteobacteria; __Betaproteobacteria; __Burkholderiales; __Comamonadaceae; __Delftia; __Delftia tsuruhatensis	Bacteria	__Proteobacteria	__Betaproteobacteria	__Burkholderiales	__Comamonadaceae	__Delftia	__Delftia tsuruhatensis	1	1	NR_113870.1	NA	NA	0	173	0	0	0	0	0	358	321	0	0	0	0	0	161	0	0	0	75	0	0	165	0	0	0	0	0	0	0	0	0	0	24	0	0	0
denovo40	Bacteria; __Verrucomicrobia; __Verrucomicrobiae; __Verrucomicrobiales; __Verrucomicrobiaceae; __Luteolibacter; __Luteolibacter flavescens	Bacteria	__Verrucomicrobia	__Verrucomicrobiae	__Verrucomicrobiales	__Verrucomicrobiaceae	__Luteolibacter	__Luteolibacter flavescens	1	1	NR_156157.1	NA	NA	0	0	0	0	0	0	0	0	0	0	0	0	0	0	0	0	0	0	0	0	0	0	0	0	0	0	0	0	0	0	0	0	0	0	0	0
denovo41	Bacteria; __Bacteroidetes; __Sphingobacteriia; __Sphingobacteriales; __Sphingobacteriaceae; __Sphingobacterium; __Sphingobacterium multivorum	Bacteria	__Bacteroidetes	__Sphingobacteriia	__Sphingobacteriales	__Sphingobacteriaceae	__Sphingobacterium	__Sphingobacterium multivorum	1	1	NR_040953.1	NA	NA	0	0	40	0	0	0	0	0	0	0	0	0	0	0	0	0	0	0	0	0	0	0	0	0	0	0	0	0	0	0	0	0	0	0	0	0
denovo42	Bacteria; __Proteobacteria; __Alphaproteobacteria; __Sphingomonadales; __Sphingomonadaceae; __Sphingomonas; __Sphingomonas kyeonggiensis	Bacteria	__Proteobacteria	__Alphaproteobacteria	__Sphingomonadales	__Sphingomonadaceae	__Sphingomonas	__Sphingomonas kyeonggiensis	1	1	NR_134182.1	NA	NA	0	0	14	0	0	0	0	0	1	0	0	0	0	0	0	0	0	0	0	0	0	34	0	0	0	0	13	0	0	0	0	0	12	0	0	0
denovo43	Bacteria; __Proteobacteria; __Gammaproteobacteria; __Xanthomonadales; __Xanthomonadaceae; __Stenotrophomonas; __Stenotrophomonas rhizophila	Bacteria	__Proteobacteria	__Gammaproteobacteria	__Xanthomonadales	__Xanthomonadaceae	__Stenotrophomonas	__Stenotrophomonas rhizophila	1	1	NR_121739.1	NA	NA	5	18	0	0	0	0	0	302	205	0	0	0	0	0	1293	0	0	0	29	0	0	292	0	0	0	0	0	0	0	0	0	0	348	0	0	0
denovo44	Bacteria; __Proteobacteria; __Alphaproteobacteria; __Caulobacterales; __Caulobacteraceae; __Brevundimonas; __Brevundimonas albigilva	Bacteria	__Proteobacteria	__Alphaproteobacteria	__Caulobacterales	__Caulobacteraceae	__Brevundimonas	__Brevundimonas albigilva	1	1	NR_148791.1	NA	NA	37	183	137	0	0	0	195	0	19	0	1	0	5	2	508	0	0	0	0	0	0	106	0	0	2	115	21	1	0	0	2	47	1185	16	1	0
denovo45	Bacteria; __Bacteroidetes; __Flavobacteriia; __Flavobacteriales; __Flavobacteriaceae; __Chryseobacterium; __Chryseobacterium zeae	Bacteria	__Bacteroidetes	__Flavobacteriia	__Flavobacteriales	__Flavobacteriaceae	__Chryseobacterium	__Chryseobacterium zeae	1	1	NR_133728.1	NA	NA	0	0	7	0	0	0	0	0	0	0	0	0	0	0	0	0	0	0	0	0	0	0	0	0	0	0	0	0	0	0	0	0	0	0	0	0
denovo46	Bacteria; __Proteobacteria; __Betaproteobacteria; __Burkholderiales; __Comamonadaceae; __Variovorax; __Variovorax paradoxus	Bacteria	__Proteobacteria	__Betaproteobacteria	__Burkholderiales	__Comamonadaceae	__Variovorax	__Variovorax paradoxus	1	1	NR_113736.1	NA	NA	89	0	0	0	0	0	140	0	0	23	0	228	47	10	0	16	0	26	0	4	0	0	0	377	130	0	0	0	0	2	34	104	423	0	0	84
denovo47	Bacteria; __Bacteroidetes; __Sphingobacteriia; __Sphingobacteriales; __Sphingobacteriaceae; __Mucilaginibacter; __Mucilaginibacter carri	Bacteria	__Bacteroidetes	__Sphingobacteriia	__Sphingobacteriales	__Sphingobacteriaceae	__Mucilaginibacter	__Mucilaginibacter carri	1	1	NR_148857.1	NA	NA	0	0	0	0	0	0	0	0	23	0	0	0	0	0	0	0	0	0	0	0	0	0	0	0	0	0	0	0	0	0	0	0	0	0	0	0
denovo48	Bacteria; __Actinobacteria; __Actinobacteria; __Corynebacteriales; __Corynebacteriaceae; __Corynebacterium; __Corynebacterium tuberculostearicum	Bacteria	__Actinobacteria	__Actinobacteria	__Corynebacteriales	__Corynebacteriaceae	__Corynebacterium	__Corynebacterium tuberculostearicum	1	1	NR_028975.1	NA	NA	14	845	218	0	0	0	0	188	187	0	0	0	15	0	1963	0	0	0	0	0	0	805	0	0	119	42	49	1	0	1	62	43	88	28	0	0
denovo49	Bacteria; __Proteobacteria; __Alphaproteobacteria; __Rhizobiales; __Xanthobacteraceae; __Ancylobacter; __Ancylobacter polymorphus	Bacteria	__Proteobacteria	__Alphaproteobacteria	__Rhizobiales	__Xanthobacteraceae	__Ancylobacter	__Ancylobacter polymorphus	1	1	NR_042795.1	NA	NA	3	0	17	0	0	0	0	0	0	0	0	0	0	0	0	0	0	0	0	0	0	0	0	0	0	0	0	0	0	0	0	0	0	0	0	0
denovo50	Bacteria; __Bacteroidetes; __Sphingobacteriia; __Sphingobacteriales; __Sphingobacteriaceae; __Pedobacter; __Pedobacter trunci	Bacteria	__Bacteroidetes	__Sphingobacteriia	__Sphingobacteriales	__Sphingobacteriaceae	__Pedobacter	__Pedobacter trunci	1	1	NR_134788.1	NA	NA	0	0	0	0	0	0	0	0	0	0	0	0	0	0	0	0	0	0	0	0	0	0	0	0	1	0	0	0	0	0	0	0	0	0	0	0
denovo51	Bacteria; __Actinobacteria; __Actinobacteria; __Micrococcales; __Micrococcaceae; __Rothia; __Rothia dentocariosa	Bacteria	__Actinobacteria	__Actinobacteria	__Micrococcales	__Micrococcaceae	__Rothia	__Rothia dentocariosa	1	1	NR_044712.2	NA	NA	31	0	19	0	0	0	492	0	43	0	0	0	27	10	0	0	0	0	0	0	0	0	0	0	37	90	24	4	0	0	0	79	157	5	0	0
denovo52	Bacteria; __Proteobacteria; __Alphaproteobacteria; __Rhodobacterales; __Rhodobacteraceae; __Paracoccus; __Paracoccus aerius	Bacteria	__Proteobacteria	__Alphaproteobacteria	__Rhodobacterales	__Rhodobacteraceae	__Paracoccus	__Paracoccus aerius	1	1	NR_157753.1	NA	NA	26	310	340	0	0	0	110	110	165	0	0	0	5	3	1372	0	0	0	56	0	0	31	0	0	88	264	220	0	0	1	19	37	1979	24	0	615
denovo53	Bacteria; __Firmicutes; __Clostridia; __Clostridiales; __Lachnospiraceae; __Kineothrix; __Kineothrix alysoides	Bacteria	__Firmicutes	__Clostridia	__Clostridiales	__Lachnospiraceae	__Kineothrix	__Kineothrix alysoides	1	1	NR_156081.1	NA	NA	0	0	0	0	0	0	0	0	0	0	0	0	0	0	1425	0	0	0	0	0	0	0	0	0	0	0	0	0	0	0	0	0	0	0	0	0
denovo54	Bacteria; __Actinobacteria; __Actinobacteria; __Micrococcales; __Micrococcaceae; __Micrococcus; __Micrococcus luteus	Bacteria	__Actinobacteria	__Actinobacteria	__Micrococcales	__Micrococcaceae	__Micrococcus	__Micrococcus luteus	1	1	NR_075062.2	NA	NA	0	0	115	0	0	0	19	0	96	0	0	0	11	0	760	0	0	0	0	0	0	182	0	0	52	0	6	0	0	0	0	46	9	1	0	72
denovo55	Bacteria; __Proteobacteria; __Alphaproteobacteria; __Rhodospirillales; __Acetobacteraceae; __Acetobacter; __Acetobacter suratthaniensis	Bacteria	__Proteobacteria	__Alphaproteobacteria	__Rhodospirillales	__Acetobacteraceae	__Acetobacter	__Acetobacter suratthaniensis	1	1	NR_146709.1	NA	NA	0	55	0	0	0	0	0	24	1	0	0	0	0	0	135	0	0	0	21	0	0	0	0	0	0	0	0	0	0	0	0	0	0	0	0	0
denovo56	Bacteria; __Actinobacteria; __Actinobacteria; __Micrococcales; __Dermabacteraceae; __Brachybacterium; __Brachybacterium faecium	Bacteria	__Actinobacteria	__Actinobacteria	__Micrococcales	__Dermabacteraceae	__Brachybacterium	__Brachybacterium faecium	1	1	NR_074655.2	NA	NA	0	0	4	0	0	0	0	56	65	0	0	0	0	0	0	0	0	0	0	0	0	85	0	0	0	0	0	0	0	1	0	0	0	0	0	0
denovo57	Bacteria; __Actinobacteria; __Actinobacteria; __Corynebacteriales; __Nocardiaceae; __Rhodococcus; __Rhodococcus sovatensis	Bacteria	__Actinobacteria	__Actinobacteria	__Corynebacteriales	__Nocardiaceae	__Rhodococcus	__Rhodococcus sovatensis	1	1	NR_156055.1	NA	NA	9	39	5	0	0	0	0	13	182	0	0	0	18	0	412	0	0	0	0	0	1	213	0	0	34	6	4	0	0	0	0	11	53	3	0	27
denovo58	Bacteria; __Proteobacteria; __Alphaproteobacteria; __Caulobacterales; __Caulobacteraceae; __Caulobacter; __Caulobacter hibisci	Bacteria	__Proteobacteria	__Alphaproteobacteria	__Caulobacterales	__Caulobacteraceae	__Caulobacter	__Caulobacter hibisci	1	1	NR_157984.1	NA	NA	0	0	0	0	0	0	0	0	0	0	0	0	0	0	0	0	0	0	0	0	0	0	0	0	0	0	0	0	0	0	0	0	0	0	0	0
denovo59	Bacteria; __Proteobacteria; __Gammaproteobacteria; __Pseudomonadales; __Moraxellaceae; __Acinetobacter; __Acinetobacter pittii	Bacteria	__Proteobacteria	__Gammaproteobacteria	__Pseudomonadales	__Moraxellaceae	__Acinetobacter	__Acinetobacter pittii	1	1	NR_117621.1	NA	NA	0	260	48	0	0	0	0	186	129	0	0	0	0	0	44	0	0	0	38	0	0	118	0	0	0	0	0	0	0	0	0	0	0	0	0	0
denovo60	Bacteria; __Bacteroidetes; __Sphingobacteriia; __Sphingobacteriales; __Sphingobacteriaceae; __Nubsella; __Nubsella zeaxanthinifaciens	Bacteria	__Bacteroidetes	__Sphingobacteriia	__Sphingobacteriales	__Sphingobacteriaceae	__Nubsella	__Nubsella zeaxanthinifaciens	1	1	NR_114146.1	NA	NA	0	0	0	0	0	0	0	0	0	0	0	0	0	0	0	0	0	0	0	0	0	0	0	0	0	0	0	0	0	0	0	0	0	0	0	0
denovo61	Bacteria; __Firmicutes; __Bacilli; __Lactobacillales; __Lactobacillaceae; __Lactobacillus; __Lactobacillus rodentium	Bacteria	__Firmicutes	__Bacilli	__Lactobacillales	__Lactobacillaceae	__Lactobacillus	__Lactobacillus rodentium	1	1	NR_133768.1	NA	NA	0	0	0	0	0	0	0	0	0	0	0	0	0	0	0	0	0	0	0	0	0	0	0	0	0	0	0	0	0	0	0	0	0	0	0	0
denovo62	Bacteria; __Firmicutes; __Bacilli; __Lactobacillales; __Carnobacteriaceae; __Granulicatella; __Granulicatella adiacens	Bacteria	__Firmicutes	__Bacilli	__Lactobacillales	__Carnobacteriaceae	__Granulicatella	__Granulicatella adiacens	1	1	NR_025862.1	NA	NA	4	44	95	0	0	0	41	0	118	0	0	0	0	0	0	0	0	0	0	0	0	0	0	0	274	0	80	0	0	0	9	0	9	14	0	47
denovo63	Bacteria; __Proteobacteria; __Gammaproteobacteria; __Pseudomonadales; __Moraxellaceae; __Acinetobacter; __Acinetobacter seohaensis	Bacteria	__Proteobacteria	__Gammaproteobacteria	__Pseudomonadales	__Moraxellaceae	__Acinetobacter	__Acinetobacter seohaensis	1	1	NR_115299.1	NA	NA	0	0	0	0	0	0	0	0	0	0	0	0	0	0	0	0	0	0	0	0	0	0	0	0	0	0	0	0	0	0	0	0	0	0	0	0
denovo64	Bacteria; __Planctomycetes; __Planctomycetia; __Gemmatales; __Gemmataceae; __Gemmata; __Gemmata obscuriglobus	Bacteria	__Planctomycetes	__Planctomycetia	__Gemmatales	__Gemmataceae	__Gemmata	__Gemmata obscuriglobus	1	1	NR_114712.1	NA	NA	0	0	0	0	0	0	0	0	0	0	0	0	0	0	0	0	0	0	0	0	0	0	0	0	0	0	0	0	0	0	0	0	0	0	0	0
denovo65	Bacteria; __Bacteroidetes; __Flavobacteriia; __Flavobacteriales; __Flavobacteriaceae; __Chryseobacterium; __Chryseobacterium greenlandense	Bacteria	__Bacteroidetes	__Flavobacteriia	__Flavobacteriales	__Flavobacteriaceae	__Chryseobacterium	__Chryseobacterium greenlandense	1	1	NR_116857.1	NA	NA	57	0	0	0	0	0	181	0	3	0	0	0	8	0	0	0	0	0	0	0	1	53	0	0	100	126	16	0	1	0	0	87	0	7	0	23
denovo66	Bacteria; __Proteobacteria; __Betaproteobacteria; __Burkholderiales; __Alcaligenaceae; __Achromobacter; __Achromobacter animicus	Bacteria	__Proteobacteria	__Betaproteobacteria	__Burkholderiales	__Alcaligenaceae	__Achromobacter	__Achromobacter animicus	1	1	NR_117615.1	NA	NA	0	0	0	0	0	0	0	0	27	0	0	0	0	0	0	0	0	0	0	0	0	0	0	0	0	0	0	0	0	0	0	0	0	0	0	0
denovo67	Bacteria; __Bacteroidetes; __Flavobacteriia; __Flavobacteriales; __Flavobacteriaceae; __Cloacibacterium; __Cloacibacterium normanense	Bacteria	__Bacteroidetes	__Flavobacteriia	__Flavobacteriales	__Flavobacteriaceae	__Cloacibacterium	__Cloacibacterium normanense	1	1	NR_042187.1	NA	NA	0	0	5	0	0	0	2	0	0	0	0	0	0	0	1168	0	0	0	0	0	0	0	0	0	0	0	0	0	0	0	0	0	14	0	0	0
denovo68	Bacteria; __Bacteroidetes; __Flavobacteriia; __Flavobacteriales; __Flavobacteriaceae; __Chryseobacterium; __Chryseobacterium aquifrigidense	Bacteria	__Bacteroidetes	__Flavobacteriia	__Flavobacteriales	__Flavobacteriaceae	__Chryseobacterium	__Chryseobacterium aquifrigidense	1	1	NR_044334.1	NA	NA	0	19	0	0	0	0	0	0	75	0	0	0	0	0	201	0	0	0	0	0	0	0	0	0	0	0	0	0	0	0	0	0	0	0	0	0
denovo69	Bacteria; __Firmicutes; __Clostridia; __Clostridiales; __; __Intestinimonas; __Intestinimonas butyriciproducens	Bacteria	__Firmicutes	__Clostridia	__Clostridiales	__	__Intestinimonas	__Intestinimonas butyriciproducens	1	1	NR_118554.1	NA	NA	0	0	0	0	0	0	0	0	0	0	0	0	0	0	0	0	0	0	0	0	0	0	0	0	0	0	0	0	0	0	0	0	0	0	0	0
denovo70	Bacteria; __Firmicutes; __Clostridia; __Clostridiales; __Lachnospiraceae; __Lachnoclostridium; __Lachnoclostridium pacaense	Bacteria	__Firmicutes	__Clostridia	__Clostridiales	__Lachnospiraceae	__Lachnoclostridium	__Lachnoclostridium pacaense	1	1	NR_147396.1	NA	NA	0	0	0	0	0	0	0	0	0	0	0	0	0	0	1141	0	0	0	0	0	0	0	0	0	0	0	0	0	0	0	0	0	0	0	0	0
denovo71	Bacteria; __Proteobacteria; __Betaproteobacteria; __Neisseriales; __Neisseriaceae; __Snodgrassella; __Snodgrassella alvi	Bacteria	__Proteobacteria	__Betaproteobacteria	__Neisseriales	__Neisseriaceae	__Snodgrassella	__Snodgrassella alvi	1	1	NR_121735.2	NA	NA	0	0	0	0	0	0	0	0	0	0	0	0	0	0	0	0	0	0	0	0	0	0	0	0	85	0	0	0	0	0	0	0	28	1	0	0
denovo72	Bacteria; __Proteobacteria; __Gammaproteobacteria; __Enterobacterales; __Enterobacteriaceae; __Cedecea; __Cedecea lapagei	Bacteria	__Proteobacteria	__Gammaproteobacteria	__Enterobacterales	__Enterobacteriaceae	__Cedecea	__Cedecea lapagei	1	1	NR_126318.1	NA	NA	71	509	369	0	0	3	4	0	0	0	0	0	1	3	1	0	0	0	0	0	0	0	0	0	40	6	42	4	0	4	39	0	87	0	14	0
denovo73	Bacteria; __Proteobacteria; __Gammaproteobacteria; __Enterobacterales; __Enterobacteriaceae; __Escherichia; __Escherichia fergusonii	Bacteria	__Proteobacteria	__Gammaproteobacteria	__Enterobacterales	__Enterobacteriaceae	__Escherichia	__Escherichia fergusonii	1	1	NR_074902.1	NA	NA	0	0	27	0	0	0	0	0	59	0	0	0	0	0	0	0	0	0	0	0	0	18	0	0	106	0	0	0	0	0	32	14	0	0	0	0
denovo74	Bacteria; __Firmicutes; __Bacilli; __Bacillales; __; __Gemella; __Gemella taiwanensis	Bacteria	__Firmicutes	__Bacilli	__Bacillales	__	__Gemella	__Gemella taiwanensis	1	1	NR_133753.1	NA	NA	0	23	36	0	0	0	32	0	137	0	0	0	0	0	694	0	0	0	0	0	0	443	0	0	0	0	10	0	0	0	0	0	0	1	0	0
denovo75	Bacteria; __Firmicutes; __Negativicutes; __Veillonellales; __Veillonellaceae; __Veillonella; __Veillonella dispar	Bacteria	__Firmicutes	__Negativicutes	__Veillonellales	__Veillonellaceae	__Veillonella	__Veillonella dispar	1	1	NR_041879.1	NA	NA	0	0	635	0	0	0	0	0	68	0	0	0	0	14	0	0	0	0	0	0	0	152	0	0	49	0	0	0	0	0	0	23	80	18	0	271
denovo76	Bacteria; __Fusobacteria; __Fusobacteriia; __Fusobacteriales; __Leptotrichiaceae; __Leptotrichia; __Leptotrichia buccalis	Bacteria	__Fusobacteria	__Fusobacteriia	__Fusobacteriales	__Leptotrichiaceae	__Leptotrichia	__Leptotrichia buccalis	1	1	NR_114394.1	NA	NA	0	0	0	0	0	0	130	0	0	0	0	0	5	7	0	0	0	0	0	0	0	0	0	0	42	0	0	0	0	0	0	0	71	0	23	136
denovo77	Bacteria; __Actinobacteria; __Actinobacteria; __Micrococcales; __Micrococcaceae; __Rothia; __Rothia mucilaginosa	Bacteria	__Actinobacteria	__Actinobacteria	__Micrococcales	__Micrococcaceae	__Rothia	__Rothia mucilaginosa	1	1	NR_044873.1	NA	NA	0	0	96	0	1	0	0	3	0	0	0	0	0	0	560	0	0	0	0	0	0	106	0	0	27	0	0	0	0	0	0	0	0	0	0	0
denovo78	Bacteria; __Firmicutes; __Clostridia; __Clostridiales; __Peptostreptococcaceae; __Peptostreptococcus; __Peptostreptococcus stomatis	Bacteria	__Firmicutes	__Clostridia	__Clostridiales	__Peptostreptococcaceae	__Peptostreptococcus	__Peptostreptococcus stomatis	1	1	NR_043589.1	NA	NA	2	0	11	0	0	0	0	0	0	0	0	0	0	0	681	0	0	0	0	0	0	0	0	0	0	0	0	0	0	0	0	0	0	0	0	0
denovo79	Bacteria; __Bacteroidetes; __Flavobacteriia; __Flavobacteriales; __Flavobacteriaceae; __Empedobacter; __Empedobacter falsenii	Bacteria	__Bacteroidetes	__Flavobacteriia	__Flavobacteriales	__Flavobacteriaceae	__Empedobacter	__Empedobacter falsenii	1	1	NR_042430.2	NA	NA	0	0	9	0	0	0	0	56	63	0	0	0	0	0	353	0	0	0	36	0	0	310	0	0	0	0	0	0	0	0	15	0	57	0	0	0
denovo80	Bacteria; __Proteobacteria; __Gammaproteobacteria; __Pseudomonadales; __Pseudomonadaceae; __Pseudomonas; __Pseudomonas aeruginosa	Bacteria	__Proteobacteria	__Gammaproteobacteria	__Pseudomonadales	__Pseudomonadaceae	__Pseudomonas	__Pseudomonas aeruginosa	1	1	NR_117678.1	NA	NA	0	21	64	0	0	0	1	0	5	0	0	0	1	0	184	0	0	0	0	0	0	0	0	0	0	0	0	1	0	6	0	29	0	0	2	0
denovo81	Bacteria; __Proteobacteria; __Betaproteobacteria; __Neisseriales; __Neisseriaceae; __Neisseria; __Neisseria mucosa	Bacteria	__Proteobacteria	__Betaproteobacteria	__Neisseriales	__Neisseriaceae	__Neisseria	__Neisseria mucosa	1	1	NR_117717.1	NA	NA	10	0	0	0	0	0	87	0	0	0	0	0	8	0	0	0	0	0	0	0	0	325	0	0	113	0	0	0	0	0	0	38	191	11	19	59
denovo82	Bacteria; __Proteobacteria; __Gammaproteobacteria; __Pseudomonadales; __Moraxellaceae; __Acinetobacter; __Acinetobacter johnsonii	Bacteria	__Proteobacteria	__Gammaproteobacteria	__Pseudomonadales	__Moraxellaceae	__Acinetobacter	__Acinetobacter johnsonii	1	1	NR_117624.1	NA	NA	14	230	40	0	0	0	0	155	318	0	0	0	0	0	279	0	0	0	60	0	0	340	0	0	0	0	0	0	0	1	0	55	0	9	0	0
denovo83	Bacteria; __Proteobacteria; __Gammaproteobacteria; __Pseudomonadales; __Moraxellaceae; __Acinetobacter; __Acinetobacter junii	Bacteria	__Proteobacteria	__Gammaproteobacteria	__Pseudomonadales	__Moraxellaceae	__Acinetobacter	__Acinetobacter junii	1	1	NR_117623.1	NA	NA	2	20	0	0	0	0	63	7	13	0	0	0	0	0	0	0	0	0	126	0	0	0	0	0	0	0	38	0	0	0	19	108	125	15	4	193
denovo84	Bacteria; __Proteobacteria; __Gammaproteobacteria; __Pasteurellales; __Pasteurellaceae; __Haemophilus; __Haemophilus parainfluenzae	Bacteria	__Proteobacteria	__Gammaproteobacteria	__Pasteurellales	__Pasteurellaceae	__Haemophilus	__Haemophilus parainfluenzae	1	1	NR_116168.1	NA	NA	5	0	9	0	0	0	24	39	123	0	0	0	2	0	0	0	0	0	2	0	0	189	0	0	0	107	0	0	0	0	4	23	139	13	2	0
denovo85	; __; __; __; __; __; __		__	__	__	__	__	__	1	1	NA	NA	NA	0	0	0	0	0	0	0	0	0	0	0	0	0	0	0	0	0	0	0	0	0	0	0	0	0	0	0	0	0	0	0	0	0	0	0	0
denovo86	Bacteria; __Proteobacteria; __Alphaproteobacteria; __Rhizobiales; __Bradyrhizobiaceae; __Bosea; __Bosea robiniae	Bacteria	__Proteobacteria	__Alphaproteobacteria	__Rhizobiales	__Bradyrhizobiaceae	__Bosea	__Bosea robiniae	1	1	NR_108516.1	NA	NA	14	0	27	0	0	0	0	0	0	0	0	0	0	0	0	0	0	0	0	0	0	23	0	0	108	0	66	0	0	0	0	0	240	0	0	0
denovo87	Bacteria; __Bacteroidetes; __Chitinophagia; __Chitinophagales; __Chitinophagaceae; __Rurimicrobium; __Rurimicrobium arvi	Bacteria	__Bacteroidetes	__Chitinophagia	__Chitinophagales	__Chitinophagaceae	__Rurimicrobium	__Rurimicrobium arvi	1	1	NR_159218.1	NA	NA	0	0	0	0	0	0	0	0	0	0	0	0	0	0	0	0	0	0	0	0	0	0	0	0	0	0	0	0	0	0	0	0	0	0	0	0
denovo88	Bacteria; __Proteobacteria; __Gammaproteobacteria; __Nevskiales; __Sinobacteraceae; __Fontimonas; __Fontimonas thermophila	Bacteria	__Proteobacteria	__Gammaproteobacteria	__Nevskiales	__Sinobacteraceae	__Fontimonas	__Fontimonas thermophila	1	1	NR_109471.1	NA	NA	0	0	0	0	0	0	0	0	0	0	0	0	0	0	842	0	0	0	0	0	0	0	0	0	0	0	0	0	0	0	0	0	0	0	0	0
denovo89	Bacteria; __Actinobacteria; __Actinobacteria; __Propionibacteriales; __Nocardioidaceae; __Nocardioides; __Nocardioides iriomotensis	Bacteria	__Actinobacteria	__Actinobacteria	__Propionibacteriales	__Nocardioidaceae	__Nocardioides	__Nocardioides iriomotensis	1	1	NR_113050.1	NA	NA	0	0	0	0	0	0	0	3	0	0	0	0	0	0	432	0	0	0	0	0	0	0	0	0	3	0	0	0	0	0	0	0	0	0	0	0
denovo90	Bacteria; __Proteobacteria; __Oligoflexia; __Bdellovibrionales; __Bdellovibrionaceae; __Bdellovibrio; __Bdellovibrio bacteriovorus	Bacteria	__Proteobacteria	__Oligoflexia	__Bdellovibrionales	__Bdellovibrionaceae	__Bdellovibrio	__Bdellovibrio bacteriovorus	1	1	NR_027553.1	NA	NA	0	0	0	0	0	0	0	0	0	0	0	0	0	0	0	0	0	0	0	0	0	0	0	0	0	0	0	0	0	0	0	0	0	0	0	0
denovo91	Bacteria; __Deinococcus-Thermus; __Deinococci; __Deinococcales; __Deinococcaceae; __Deinococcus; __Deinococcus xinjiangensis	Bacteria	__Deinococcus-Thermus	__Deinococci	__Deinococcales	__Deinococcaceae	__Deinococcus	__Deinococcus xinjiangensis	1	1	NR_044542.1	NA	NA	5	0	19	0	0	1	18	29	0	0	0	0	3	0	0	0	0	0	0	0	0	0	0	0	0	0	9	0	0	0	6	37	141	0	1	0
denovo92	Bacteria; __Proteobacteria; __Gammaproteobacteria; __Enterobacterales; __Yersiniaceae; __Serratia; __Serratia marcescens	Bacteria	__Proteobacteria	__Gammaproteobacteria	__Enterobacterales	__Yersiniaceae	__Serratia	__Serratia marcescens	1	1	NR_114043.1	NA	NA	7	74	13	0	0	0	0	73	0	0	0	0	0	0	0	0	0	0	0	0	0	81	0	0	0	0	0	0	0	3	0	11	0	13	0	0
denovo93	Bacteria; __Proteobacteria; __Alphaproteobacteria; __Rhizobiales; __Xanthobacteraceae; __Pseudoxanthobacter; __Pseudoxanthobacter soli	Bacteria	__Proteobacteria	__Alphaproteobacteria	__Rhizobiales	__Xanthobacteraceae	__Pseudoxanthobacter	__Pseudoxanthobacter soli	1	1	NR_044225.1	NA	NA	0	0	0	0	0	0	0	0	0	0	0	0	0	0	0	0	0	0	0	0	0	0	0	0	0	0	0	0	0	0	0	0	0	0	0	0
denovo94	Bacteria; __Firmicutes; __Tissierellia; __Tissierellales; __Peptoniphilaceae; __Peptoniphilus; __Peptoniphilus lacydonensis	Bacteria	__Firmicutes	__Tissierellia	__Tissierellales	__Peptoniphilaceae	__Peptoniphilus	__Peptoniphilus lacydonensis	1	1	NR_157682.1	NA	NA	0	0	0	0	0	0	0	0	0	0	0	0	0	0	443	0	0	0	0	0	0	0	0	0	0	0	1	0	0	0	6	0	0	0	0	36
denovo95	Bacteria; __Bacteroidetes; __Flavobacteriia; __Flavobacteriales; __Flavobacteriaceae; __Chryseobacterium; __Chryseobacterium arthrosphaerae	Bacteria	__Bacteroidetes	__Flavobacteriia	__Flavobacteriales	__Flavobacteriaceae	__Chryseobacterium	__Chryseobacterium arthrosphaerae	1	1	NR_116977.1	NA	NA	0	81	0	0	0	0	0	0	79	0	0	0	0	0	0	0	0	0	0	0	0	0	0	0	0	0	0	0	0	0	0	0	0	0	0	0
denovo96	Bacteria; __Proteobacteria; __Gammaproteobacteria; __Pseudomonadales; __Pseudomonadaceae; __Oblitimonas; __Oblitimonas alkaliphila	Bacteria	__Proteobacteria	__Gammaproteobacteria	__Pseudomonadales	__Pseudomonadaceae	__Oblitimonas	__Oblitimonas alkaliphila	1	1	NR_151929.1	NA	NA	0	0	0	0	0	0	0	0	0	0	0	0	0	0	0	0	0	0	0	0	0	0	0	0	0	0	0	0	0	0	0	0	0	0	0	0
denovo97	Bacteria; __Firmicutes; __Bacilli; __Bacillales; __Paenibacillaceae; __Cohnella; __Cohnella yongneupensis	Bacteria	__Firmicutes	__Bacilli	__Bacillales	__Paenibacillaceae	__Cohnella	__Cohnella yongneupensis	1	1	NR_115997.1	NA	NA	0	0	0	0	0	0	0	0	0	0	0	0	0	0	0	0	0	0	0	0	0	0	0	0	0	0	0	0	0	0	0	0	0	0	0	0
denovo98	Bacteria; __Proteobacteria; __Betaproteobacteria; __Burkholderiales; __Comamonadaceae; __Pelomonas; __Pelomonas saccharophila	Bacteria	__Proteobacteria	__Betaproteobacteria	__Burkholderiales	__Comamonadaceae	__Pelomonas	__Pelomonas saccharophila	1	1	NR_114189.1	NA	NA	0	0	0	0	0	0	0	0	0	0	0	0	0	0	0	0	0	0	0	0	0	0	0	0	0	0	25	0	0	0	0	0	0	10	0	0
denovo99	Bacteria; __Firmicutes; __Clostridia; __Clostridiales; __Ruminococcaceae; __Ruminococcus; __Ruminococcus champanellensis	Bacteria	__Firmicutes	__Clostridia	__Clostridiales	__Ruminococcaceae	__Ruminococcus	__Ruminococcus champanellensis	1	1	NR_102884.1	NA	NA	0	0	0	0	0	0	0	0	0	0	0	0	0	0	0	0	0	0	0	0	0	0	0	0	0	0	0	0	0	0	0	0	0	0	0	0
denovo100	Bacteria; __Firmicutes; __Bacilli; __Lactobacillales; __Streptococcaceae; __Lactococcus; __Lactococcus lactis	Bacteria	__Firmicutes	__Bacilli	__Lactobacillales	__Streptococcaceae	__Lactococcus	__Lactococcus lactis	1	1	NR_113925.1	NA	NA	0	2	24	0	0	0	0	0	117	0	0	0	0	0	350	0	0	0	0	0	0	11	0	0	0	0	0	0	0	0	0	0	0	0	0	0
denovo101	Bacteria; __Proteobacteria; __Gammaproteobacteria; __Enterobacterales; __Yersiniaceae; __Serratia; __Serratia oryzae	Bacteria	__Proteobacteria	__Gammaproteobacteria	__Enterobacterales	__Yersiniaceae	__Serratia	__Serratia oryzae	1	1	NR_157762.1	NA	NA	0	0	0	0	0	1	0	0	0	0	0	13	0	0	0	0	0	0	0	0	0	0	0	0	0	0	0	0	5	3	0	0	0	0	14	0
denovo102	Bacteria; __Bacteroidetes; __Bacteroidia; __Bacteroidales; __Bacteroidaceae; __Mediterranea; __Mediterranea massiliensis	Bacteria	__Bacteroidetes	__Bacteroidia	__Bacteroidales	__Bacteroidaceae	__Mediterranea	__Mediterranea massiliensis	1	1	NR_144747.1	NA	NA	0	0	0	0	0	0	0	0	0	0	0	0	0	0	890	0	0	0	0	0	0	0	0	0	0	0	0	0	0	0	0	0	0	0	0	0
denovo103	Bacteria; __Deinococcus-Thermus; __Deinococci; __Deinococcales; __Deinococcaceae; __Deinococcus; __Deinococcus taklimakanensis	Bacteria	__Deinococcus-Thermus	__Deinococci	__Deinococcales	__Deinococcaceae	__Deinococcus	__Deinococcus taklimakanensis	1	1	NR_159153.1	NA	NA	9	0	0	0	0	0	66	0	0	0	0	0	6	0	0	0	0	0	0	0	0	0	0	0	53	0	0	0	0	0	42	81	268	10	2	19
denovo104	; __; __; __; __; __; __		__	__	__	__	__	__	1	1	NA	NA	NA	10	0	3	0	0	0	0	0	0	0	0	0	0	8	0	0	0	0	0	0	0	0	0	0	0	0	14	0	0	0	0	0	233	0	0	0
denovo105	Bacteria; __Firmicutes; __Negativicutes; __Veillonellales; __Veillonellaceae; __Veillonella; __Veillonella montpellierensis	Bacteria	__Firmicutes	__Negativicutes	__Veillonellales	__Veillonellaceae	__Veillonella	__Veillonella montpellierensis	1	1	NR_028839.1	NA	NA	0	0	0	0	0	0	0	53	0	0	0	0	0	0	443	0	0	0	0	0	0	0	0	0	8	0	42	0	0	6	0	0	170	0	0	0
denovo106	Bacteria; __Actinobacteria; __Actinobacteria; __Corynebacteriales; __Corynebacteriaceae; __Corynebacterium; __Corynebacterium amycolatum	Bacteria	__Actinobacteria	__Actinobacteria	__Corynebacteriales	__Corynebacteriaceae	__Corynebacterium	__Corynebacterium amycolatum	1	1	NR_117605.1	NA	NA	7	39	4	0	1	0	62	0	8	0	0	0	9	5	0	0	0	0	0	0	0	0	0	0	1	92	0	0	0	0	1	15	14	23	0	0
denovo107	Bacteria; __Proteobacteria; __Gammaproteobacteria; __Cardiobacteriales; __Cardiobacteriaceae; __Cardiobacterium; __Cardiobacterium valvarum	Bacteria	__Proteobacteria	__Gammaproteobacteria	__Cardiobacteriales	__Cardiobacteriaceae	__Cardiobacterium	__Cardiobacterium valvarum	1	1	NR_028847.1	NA	NA	0	0	0	0	0	0	0	0	0	0	0	0	0	0	0	0	0	0	0	0	0	0	0	0	0	0	0	0	0	0	0	0	131	0	0	53
denovo108	Bacteria; __Actinobacteria; __Actinobacteria; __Corynebacteriales; __Corynebacteriaceae; __Corynebacterium; __Corynebacterium aurimucosum	Bacteria	__Actinobacteria	__Actinobacteria	__Corynebacteriales	__Corynebacteriaceae	__Corynebacterium	__Corynebacterium aurimucosum	1	1	NR_115262.1	NA	NA	30	0	0	0	0	0	0	0	0	0	0	0	7	6	0	0	0	0	0	0	0	0	0	0	0	59	0	2	0	0	3	0	117	8	0	111
denovo109	Bacteria; __Actinobacteria; __Actinobacteria; __Corynebacteriales; __Corynebacteriaceae; __Corynebacterium; __Corynebacterium pollutisoli	Bacteria	__Actinobacteria	__Actinobacteria	__Corynebacteriales	__Corynebacteriaceae	__Corynebacterium	__Corynebacterium pollutisoli	1	1	NR_151947.1	NA	NA	1	0	0	0	0	0	0	0	0	0	0	0	0	0	0	0	0	0	0	0	0	0	0	0	0	0	18	1	0	1	0	0	51	2	1	0
denovo110	Bacteria; __Firmicutes; __Bacilli; __Lactobacillales; __Aerococcaceae; __Abiotrophia; __Abiotrophia defectiva	Bacteria	__Firmicutes	__Bacilli	__Lactobacillales	__Aerococcaceae	__Abiotrophia	__Abiotrophia defectiva	1	1	NR_025863.1	NA	NA	15	0	0	0	0	0	1	0	0	0	0	0	0	0	0	0	0	0	0	0	0	0	0	0	46	75	0	0	0	0	0	0	0	1	0	0
denovo111	Bacteria; __Proteobacteria; __Betaproteobacteria; __Burkholderiales; __; __Tepidimonas; __Tepidimonas fonticaldi	Bacteria	__Proteobacteria	__Betaproteobacteria	__Burkholderiales	__	__Tepidimonas	__Tepidimonas fonticaldi	1	1	NR_109514.1	NA	NA	0	0	0	0	0	0	36	0	0	0	0	0	0	2	0	0	0	0	0	0	0	0	0	0	0	0	0	0	0	0	0	0	0	0	0	0
denovo112	Bacteria; __Proteobacteria; __Betaproteobacteria; __Burkholderiales; __Comamonadaceae; __Pseudacidovorax; __Pseudacidovorax intermedius	Bacteria	__Proteobacteria	__Betaproteobacteria	__Burkholderiales	__Comamonadaceae	__Pseudacidovorax	__Pseudacidovorax intermedius	1	1	NR_044241.1	NA	NA	0	0	0	0	0	0	0	0	0	0	0	0	0	0	0	0	0	0	0	0	0	0	0	0	0	0	0	0	0	0	0	0	0	0	0	0
denovo113	Bacteria; __Firmicutes; __Erysipelotrichia; __Erysipelotrichales; __Erysipelotrichaceae; __Solobacterium; __Solobacterium moorei	Bacteria	__Firmicutes	__Erysipelotrichia	__Erysipelotrichales	__Erysipelotrichaceae	__Solobacterium	__Solobacterium moorei	1	1	NR_113039.1	NA	NA	0	0	0	0	0	0	0	0	0	0	0	0	0	0	400	0	0	0	0	0	0	0	0	0	0	0	0	0	0	0	0	0	0	0	0	0
denovo114	Bacteria; __Proteobacteria; __Gammaproteobacteria; __Enterobacterales; __Yersiniaceae; __Yersinia; __Yersinia wautersii	Bacteria	__Proteobacteria	__Gammaproteobacteria	__Enterobacterales	__Yersiniaceae	__Yersinia	__Yersinia wautersii	1	1	NR_134230.1	NA	NA	1	0	0	0	0	0	0	0	0	0	0	0	0	0	0	0	0	0	0	0	0	0	0	0	0	0	0	0	0	0	0	0	0	0	0	0
denovo115	Bacteria; __Proteobacteria; __Gammaproteobacteria; __Pasteurellales; __Pasteurellaceae; __Haemophilus; __Haemophilus haemolyticus	Bacteria	__Proteobacteria	__Gammaproteobacteria	__Pasteurellales	__Pasteurellaceae	__Haemophilus	__Haemophilus haemolyticus	1	1	NR_104930.1	NA	NA	0	41	3	0	0	0	0	0	25	0	0	0	0	0	332	0	0	0	0	0	0	0	0	0	0	0	31	0	0	0	0	0	73	0	0	17
denovo116	Bacteria; __Actinobacteria; __Actinobacteria; __Corynebacteriales; __Corynebacteriaceae; __Corynebacterium; __Corynebacterium ureicelerivorans	Bacteria	__Actinobacteria	__Actinobacteria	__Corynebacteriales	__Corynebacteriaceae	__Corynebacterium	__Corynebacterium ureicelerivorans	1	1	NR_042558.1	NA	NA	16	0	0	0	0	0	20	25	2	0	0	0	9	0	816	0	0	0	0	0	0	0	0	0	0	0	22	0	0	2	13	14	37	0	0	25
denovo117	Bacteria; __Proteobacteria; __Gammaproteobacteria; __Xanthomonadales; __Xanthomonadaceae; __Pseudoxanthomonas; __Pseudoxanthomonas taiwanensis	Bacteria	__Proteobacteria	__Gammaproteobacteria	__Xanthomonadales	__Xanthomonadaceae	__Pseudoxanthomonas	__Pseudoxanthomonas taiwanensis	1	1	NR_113974.1	NA	NA	0	0	0	0	0	0	48	0	0	0	0	0	0	0	0	0	0	0	0	0	0	0	0	0	0	0	0	0	0	0	0	0	0	0	0	0
denovo118	Bacteria; __Proteobacteria; __Betaproteobacteria; __Burkholderiales; __Oxalobacteraceae; __Massilia; __Massilia suwonensis	Bacteria	__Proteobacteria	__Betaproteobacteria	__Burkholderiales	__Oxalobacteraceae	__Massilia	__Massilia suwonensis	1	1	NR_116872.1	NA	NA	0	0	2	0	0	0	0	66	118	0	0	0	0	0	0	0	0	0	1	0	0	103	0	0	0	0	42	0	0	0	0	0	63	0	0	0
denovo119	Bacteria; __Firmicutes; __Tissierellia; __Tissierellales; __Peptoniphilaceae; __Finegoldia; __Finegoldia magna	Bacteria	__Firmicutes	__Tissierellia	__Tissierellales	__Peptoniphilaceae	__Finegoldia	__Finegoldia magna	1	1	NR_113383.1	NA	NA	17	0	0	0	0	0	0	0	0	0	0	0	0	0	0	0	0	0	0	0	0	0	0	0	0	0	11	0	0	2	18	0	64	11	0	0
denovo120	Bacteria; __Proteobacteria; __Alphaproteobacteria; __Rhizobiales; __Methylobacteriaceae; __Methylobacterium; __Methylobacterium phyllostachyos	Bacteria	__Proteobacteria	__Alphaproteobacteria	__Rhizobiales	__Methylobacteriaceae	__Methylobacterium	__Methylobacterium phyllostachyos	1	1	NR_108242.1	NA	NA	0	0	380	0	0	0	0	0	0	0	0	0	0	0	0	0	0	0	0	0	0	0	0	0	0	0	25	2	0	0	0	2	0	1	0	0
denovo121	Bacteria; __Proteobacteria; __Alphaproteobacteria; __Rhizobiales; __; __Nordella; __Nordella oligomobilis	Bacteria	__Proteobacteria	__Alphaproteobacteria	__Rhizobiales	__	__Nordella	__Nordella oligomobilis	1	1	NR_114615.1	NA	NA	0	0	0	0	0	0	0	0	0	0	0	0	0	0	0	0	0	0	0	0	0	0	0	0	0	0	0	0	0	0	0	0	0	0	0	0
denovo122	Bacteria; __Actinobacteria; __Actinobacteria; __Corynebacteriales; __Corynebacteriaceae; __Corynebacterium; __Corynebacterium appendicis	Bacteria	__Actinobacteria	__Actinobacteria	__Corynebacteriales	__Corynebacteriaceae	__Corynebacterium	__Corynebacterium appendicis	1	1	NR_028951.1	NA	NA	2	0	0	0	0	0	0	0	0	0	0	0	0	1	0	0	0	0	0	0	0	0	0	0	0	24	5	0	0	0	0	43	25	0	4	0
denovo123	Bacteria; __Proteobacteria; __Deltaproteobacteria; __Myxococcales; __Sandaracinaceae; __Sandaracinus; __Sandaracinus amylolyticus	Bacteria	__Proteobacteria	__Deltaproteobacteria	__Myxococcales	__Sandaracinaceae	__Sandaracinus	__Sandaracinus amylolyticus	1	1	NR_118001.1	NA	NA	0	0	0	0	0	0	0	0	0	0	0	0	0	0	0	0	0	0	0	0	0	0	0	0	0	0	0	0	0	0	0	0	0	0	0	0
denovo124	Bacteria; __Actinobacteria; __Actinobacteria; __Corynebacteriales; __Corynebacteriaceae; __Corynebacterium; __Corynebacterium sundsvallense	Bacteria	__Actinobacteria	__Actinobacteria	__Corynebacteriales	__Corynebacteriaceae	__Corynebacterium	__Corynebacterium sundsvallense	1	1	NR_026375.1	NA	NA	0	0	0	0	0	0	0	0	0	0	0	0	0	0	0	0	0	0	0	0	0	214	0	0	0	0	0	0	0	0	0	0	0	0	0	8
denovo125	Bacteria; __Actinobacteria; __Actinobacteria; __Propionibacteriales; __Nocardioidaceae; __Nocardioides; __Nocardioides islandensis	Bacteria	__Actinobacteria	__Actinobacteria	__Propionibacteriales	__Nocardioidaceae	__Nocardioides	__Nocardioides islandensis	1	1	NR_044235.1	NA	NA	0	0	0	0	0	0	0	0	0	0	0	0	0	0	0	0	0	0	0	0	0	0	0	0	0	0	0	0	0	0	0	0	0	0	0	0
denovo126	Bacteria; __Firmicutes; __Bacilli; __Lactobacillales; __Lactobacillaceae; __Lactobacillus; __Lactobacillus aquaticus	Bacteria	__Firmicutes	__Bacilli	__Lactobacillales	__Lactobacillaceae	__Lactobacillus	__Lactobacillus aquaticus	1	1	NR_115847.1	NA	NA	0	11	0	0	0	0	0	51	0	0	0	0	0	0	0	0	0	0	0	0	0	0	0	0	0	0	0	0	0	0	0	0	0	0	0	0
denovo127	Bacteria; __Bacteroidetes; __Bacteroidia; __Bacteroidales; __Prevotellaceae; __Alloprevotella; __Alloprevotella rava	Bacteria	__Bacteroidetes	__Bacteroidia	__Bacteroidales	__Prevotellaceae	__Alloprevotella	__Alloprevotella rava	1	1	NR_118334.1	NA	NA	0	18	0	0	0	0	0	0	4	0	0	0	0	0	323	0	0	0	0	0	0	0	0	0	0	0	0	0	0	0	0	0	0	0	0	0
denovo128	Bacteria; __Firmicutes; __Bacilli; __Bacillales; __Planococcaceae; __Caryophanon; __Caryophanon latum	Bacteria	__Firmicutes	__Bacilli	__Bacillales	__Planococcaceae	__Caryophanon	__Caryophanon latum	1	1	NR_036850.1	NA	NA	0	0	0	0	0	0	0	0	0	0	0	0	0	0	0	0	0	0	0	0	0	0	0	0	0	0	0	0	0	0	0	0	0	0	0	0
denovo129	Bacteria; __Proteobacteria; __Alphaproteobacteria; __Caulobacterales; __Caulobacteraceae; __Caulobacter; __Caulobacter profundus	Bacteria	__Proteobacteria	__Alphaproteobacteria	__Caulobacterales	__Caulobacteraceae	__Caulobacter	__Caulobacter profundus	1	1	NR_133716.1	NA	NA	6	0	0	0	0	0	0	0	0	0	0	0	0	0	0	0	0	0	0	0	0	0	0	0	0	0	0	0	0	0	0	0	66	0	0	0
denovo130	Bacteria; __Bacteroidetes; __Bacteroidia; __Bacteroidales; __Prevotellaceae; __Alloprevotella; __Alloprevotella rava	Bacteria	__Bacteroidetes	__Bacteroidia	__Bacteroidales	__Prevotellaceae	__Alloprevotella	__Alloprevotella rava	1	1	NR_118334.1	NA	NA	0	0	2	0	0	0	0	0	3	0	0	0	5	0	0	0	0	0	0	0	0	269	0	0	0	0	0	0	0	0	0	0	0	0	0	0
denovo131	Bacteria; __Firmicutes; __Bacilli; __Lactobacillales; __Carnobacteriaceae; __Atopostipes; __Atopostipes suicloacalis	Bacteria	__Firmicutes	__Bacilli	__Lactobacillales	__Carnobacteriaceae	__Atopostipes	__Atopostipes suicloacalis	1	1	NR_028835.1	NA	NA	2	0	0	0	0	0	0	0	0	0	0	0	4	7	0	0	0	0	0	0	0	0	0	0	26	0	0	0	0	0	0	0	102	2	0	0
denovo132	Bacteria; __Actinobacteria; __Actinobacteria; __Propionibacteriales; __Nocardioidaceae; __Nocardioides; __Nocardioides glacieisoli	Bacteria	__Actinobacteria	__Actinobacteria	__Propionibacteriales	__Nocardioidaceae	__Nocardioides	__Nocardioides glacieisoli	1	1	NR_145916.1	NA	NA	0	0	0	0	0	0	0	0	0	0	0	0	0	0	0	0	0	0	0	0	0	0	0	0	0	0	0	0	0	0	0	0	0	0	0	72
denovo133	Bacteria; __Fusobacteria; __Fusobacteriia; __Fusobacteriales; __Leptotrichiaceae; __Leptotrichia; __Leptotrichia shahii	Bacteria	__Fusobacteria	__Fusobacteriia	__Fusobacteriales	__Leptotrichiaceae	__Leptotrichia	__Leptotrichia shahii	1	1	NR_113162.1	NA	NA	0	0	0	0	0	0	0	150	0	0	0	0	0	0	0	0	0	0	0	0	0	0	0	0	0	0	0	0	0	0	0	0	0	3	0	0
denovo134	Bacteria; __Proteobacteria; __Gammaproteobacteria; __Pseudomonadales; __Pseudomonadaceae; __Pseudomonas; __Pseudomonas grimontii	Bacteria	__Proteobacteria	__Gammaproteobacteria	__Pseudomonadales	__Pseudomonadaceae	__Pseudomonas	__Pseudomonas grimontii	1	1	NR_025102.1	NA	NA	0	0	0	120	0	0	0	0	0	0	215	0	0	0	0	92	172	45	0	0	0	0	0	0	0	0	0	0	0	0	0	0	0	0	0	0
denovo135	Bacteria; __Firmicutes; __Bacilli; __Bacillales; __Bacillaceae; __Geobacillus; __Geobacillus stearothermophilus	Bacteria	__Firmicutes	__Bacilli	__Bacillales	__Bacillaceae	__Geobacillus	__Geobacillus stearothermophilus	1	1	NR_115284.2	NA	NA	0	0	34	0	0	0	26	0	0	0	0	0	0	0	0	0	0	0	0	0	0	0	0	0	0	0	0	0	0	0	0	0	0	0	0	0
denovo136	Bacteria; __Actinobacteria; __Actinobacteria; __Corynebacteriales; __Gordoniaceae; __Gordonia; __Gordonia otitidis	Bacteria	__Actinobacteria	__Actinobacteria	__Corynebacteriales	__Gordoniaceae	__Gordonia	__Gordonia otitidis	1	1	NR_040988.1	NA	NA	0	0	9	0	0	0	0	0	0	0	0	0	0	0	345	0	0	0	0	0	0	0	0	0	0	0	0	0	0	0	0	50	0	0	0	0
denovo137	Bacteria; __Actinobacteria; __Actinobacteria; __Corynebacteriales; __Corynebacteriaceae; __Corynebacterium; __Corynebacterium kroppenstedtii	Bacteria	__Actinobacteria	__Actinobacteria	__Corynebacteriales	__Corynebacteriaceae	__Corynebacterium	__Corynebacterium kroppenstedtii	1	1	NR_074408.1	NA	NA	0	0	0	0	0	0	0	0	0	0	0	0	0	0	148	0	0	0	0	0	0	0	0	0	0	0	48	0	0	0	0	48	0	0	2	0
denovo138	Bacteria; __Actinobacteria; __Actinobacteria; __Corynebacteriales; __Corynebacteriaceae; __Corynebacterium; __Corynebacterium gottingense	Bacteria	__Actinobacteria	__Actinobacteria	__Corynebacteriales	__Corynebacteriaceae	__Corynebacterium	__Corynebacterium gottingense	1	1	NR_159075.1	NA	NA	11	0	0	0	0	0	0	0	0	0	0	0	0	7	191	0	0	0	0	0	0	0	0	0	31	0	30	0	0	2	0	0	50	0	0	0
denovo139	Bacteria; __Firmicutes; __Bacilli; __Bacillales; __Bacillaceae; __Bacillus; __Bacillus cavernae	Bacteria	__Firmicutes	__Bacilli	__Bacillales	__Bacillaceae	__Bacillus	__Bacillus cavernae	1	1	NR_148641.1	NA	NA	4	0	0	0	0	0	0	0	0	0	0	0	0	0	0	0	0	0	0	0	0	0	0	0	0	0	0	0	0	0	0	0	0	0	0	0
denovo140	Bacteria; __Firmicutes; __Clostridia; __Clostridiales; __Peptostreptococcaceae; __Romboutsia; __Romboutsia timonensis	Bacteria	__Firmicutes	__Clostridia	__Clostridiales	__Peptostreptococcaceae	__Romboutsia	__Romboutsia timonensis	1	1	NR_144740.1	NA	NA	0	0	131	0	0	0	0	0	0	0	0	0	0	0	0	0	0	0	0	0	0	0	0	0	0	0	0	0	0	0	0	0	135	0	0	0
denovo141	Bacteria; __Bacteroidetes; __Sphingobacteriia; __Sphingobacteriales; __Sphingobacteriaceae; __Pedobacter; __Pedobacter terrae	Bacteria	__Bacteroidetes	__Sphingobacteriia	__Sphingobacteriales	__Sphingobacteriaceae	__Pedobacter	__Pedobacter terrae	1	1	NR_044005.1	NA	NA	0	0	0	0	0	0	0	0	0	0	0	0	0	0	0	0	0	0	0	0	0	0	0	0	0	0	0	0	0	0	0	0	0	0	0	0
denovo142	Bacteria; __Actinobacteria; __Actinobacteria; __Corynebacteriales; __Corynebacteriaceae; __Corynebacterium; __Corynebacterium riegelii	Bacteria	__Actinobacteria	__Actinobacteria	__Corynebacteriales	__Corynebacteriaceae	__Corynebacterium	__Corynebacterium riegelii	1	1	NR_026434.1	NA	NA	0	0	41	0	0	0	0	0	0	0	0	0	0	4	0	0	0	0	0	0	0	0	0	0	0	0	0	0	0	0	12	0	138	16	0	0
denovo143	; __; __; __; __; __; __		__	__	__	__	__	__	1	1	NA	NA	NA	0	0	0	0	0	0	8	0	0	0	0	0	0	0	0	0	0	0	0	0	0	0	0	0	0	63	0	0	0	0	0	0	0	0	0	0
denovo144	Bacteria; __Firmicutes; __Bacilli; __Lactobacillales; __Enterococcaceae; __Enterococcus; __Enterococcus cecorum	Bacteria	__Firmicutes	__Bacilli	__Lactobacillales	__Enterococcaceae	__Enterococcus	__Enterococcus cecorum	1	1	NR_113923.1	NA	NA	2	36	0	0	0	0	64	0	0	0	0	0	0	8	0	0	0	0	0	0	0	0	0	0	197	98	0	0	0	0	0	76	0	4	0	0
denovo145	Bacteria; __Planctomycetes; __Planctomycetia; __Isosphaerales; __Isosphaeraceae; __Aquisphaera; __Aquisphaera giovannonii	Bacteria	__Planctomycetes	__Planctomycetia	__Isosphaerales	__Isosphaeraceae	__Aquisphaera	__Aquisphaera giovannonii	1	1	NR_122081.1	NA	NA	0	0	0	0	0	0	0	0	0	0	0	0	0	0	0	0	0	0	0	0	0	0	0	0	0	0	0	0	0	0	0	0	0	0	0	0
denovo146	Bacteria; __Firmicutes; __Clostridia; __Clostridiales; __Clostridiaceae; __Clostridium; __Clostridium saccharoperbutylacetonicum	Bacteria	__Firmicutes	__Clostridia	__Clostridiales	__Clostridiaceae	__Clostridium	__Clostridium saccharoperbutylacetonicum	1	1	NR_102516.1	NA	NA	0	0	0	0	0	0	0	0	0	0	0	0	0	0	0	0	0	0	0	0	0	5	0	0	0	0	0	0	0	0	0	0	0	0	0	0
denovo147	Bacteria; __Firmicutes; __Bacilli; __Lactobacillales; __Enterococcaceae; __Tetragenococcus; __Tetragenococcus halophilus	Bacteria	__Firmicutes	__Bacilli	__Lactobacillales	__Enterococcaceae	__Tetragenococcus	__Tetragenococcus halophilus	1	1	NR_115655.1	NA	NA	0	0	0	0	0	0	0	0	170	0	0	0	0	0	0	0	0	0	0	0	0	0	0	0	0	0	0	0	0	0	0	0	0	0	0	0
denovo148	Bacteria; __Proteobacteria; __Gammaproteobacteria; __Pseudomonadales; __Pseudomonadaceae; __Pseudomonas; __Pseudomonas savastanoi	Bacteria	__Proteobacteria	__Gammaproteobacteria	__Pseudomonadales	__Pseudomonadaceae	__Pseudomonas	__Pseudomonas savastanoi	1	1	NR_117822.1	NA	NA	0	0	0	77	0	0	0	0	0	0	114	0	0	0	0	49	94	39	0	0	0	0	0	0	0	0	0	0	0	0	0	0	0	0	0	0
denovo149	Bacteria; __Proteobacteria; __Betaproteobacteria; __Burkholderiales; __Comamonadaceae; __Hydrogenophaga; __Hydrogenophaga carboriunda	Bacteria	__Proteobacteria	__Betaproteobacteria	__Burkholderiales	__Comamonadaceae	__Hydrogenophaga	__Hydrogenophaga carboriunda	1	1	NR_132726.1	NA	NA	0	0	0	0	0	0	0	0	0	0	0	0	0	0	269	0	0	0	0	0	0	0	0	0	0	0	0	0	0	0	0	0	0	0	0	0
denovo150	Bacteria; __Actinobacteria; __Actinobacteria; __Corynebacteriales; __Corynebacteriaceae; __Corynebacterium; __Corynebacterium falsenii	Bacteria	__Actinobacteria	__Actinobacteria	__Corynebacteriales	__Corynebacteriaceae	__Corynebacterium	__Corynebacterium falsenii	1	1	NR_121720.2	NA	NA	0	0	0	0	0	0	0	0	0	0	0	0	0	0	0	0	0	0	0	0	0	61	0	0	0	0	0	0	0	0	11	0	0	0	0	0
denovo151	Bacteria; __Proteobacteria; __Alphaproteobacteria; __Rhizobiales; __Rhizobiaceae; __Rhizobium; __Rhizobium azooxidifex	Bacteria	__Proteobacteria	__Alphaproteobacteria	__Rhizobiales	__Rhizobiaceae	__Rhizobium	__Rhizobium azooxidifex	1	1	NR_144599.1	NA	NA	0	0	0	0	0	0	0	0	69	0	0	0	0	0	0	0	0	0	0	0	0	0	0	0	0	0	0	0	0	0	0	0	96	0	0	0
denovo152	Bacteria; __Bacteroidetes; __Sphingobacteriia; __Sphingobacteriales; __Sphingobacteriaceae; __Pedobacter; __Pedobacter solisilvae	Bacteria	__Bacteroidetes	__Sphingobacteriia	__Sphingobacteriales	__Sphingobacteriaceae	__Pedobacter	__Pedobacter solisilvae	1	1	NR_159137.1	NA	NA	0	0	0	0	0	0	0	0	0	0	0	0	0	0	0	0	0	0	0	0	0	0	0	0	0	0	0	0	0	0	0	0	0	0	0	0
denovo153	Bacteria; __Actinobacteria; __Coriobacteriia; __Coriobacteriales; __Coriobacteriaceae; __Olegusella; __Olegusella massiliensis	Bacteria	__Actinobacteria	__Coriobacteriia	__Coriobacteriales	__Coriobacteriaceae	__Olegusella	__Olegusella massiliensis	1	1	NR_146815.1	NA	NA	0	0	0	0	0	0	0	0	0	0	0	0	0	0	0	0	0	0	0	0	0	145	0	0	0	0	0	0	0	0	0	0	0	0	0	0
denovo154	Bacteria; __Bacteroidetes; __Bacteroidia; __Bacteroidales; __Dysgonamonadaceae; __Proteiniphilum; __Proteiniphilum acetatigenes	Bacteria	__Bacteroidetes	__Bacteroidia	__Bacteroidales	__Dysgonamonadaceae	__Proteiniphilum	__Proteiniphilum acetatigenes	1	1	NR_043154.1	NA	NA	7	0	0	0	0	0	148	0	0	0	0	0	0	0	0	0	0	0	0	0	0	0	0	0	0	0	0	0	0	0	0	0	0	0	0	0
denovo155	Bacteria; __Bacteroidetes; __Cytophagia; __Cytophagales; __Cytophagaceae; __Arsenicibacter; __Arsenicibacter rosenii	Bacteria	__Bacteroidetes	__Cytophagia	__Cytophagales	__Cytophagaceae	__Arsenicibacter	__Arsenicibacter rosenii	1	1	NR_157987.1	NA	NA	0	0	0	0	0	0	0	0	0	0	0	0	0	0	0	0	0	0	0	0	0	0	0	0	0	0	0	0	0	0	0	0	0	0	0	0
denovo156	Bacteria; __Proteobacteria; __Alphaproteobacteria; __Rhodobacterales; __Rhodobacteraceae; __Amaricoccus; __Amaricoccus kaplicensis	Bacteria	__Proteobacteria	__Alphaproteobacteria	__Rhodobacterales	__Rhodobacteraceae	__Amaricoccus	__Amaricoccus kaplicensis	1	1	NR_029201.1	NA	NA	0	0	0	0	0	0	0	0	66	0	0	0	0	0	46	0	0	0	0	0	0	0	0	0	0	42	3	0	0	0	0	0	0	0	0	0
denovo157	Bacteria; __Bacteroidetes; __Flavobacteriia; __Flavobacteriales; __Flavobacteriaceae; __Chryseobacterium; __Chryseobacterium reticulitermitis	Bacteria	__Bacteroidetes	__Flavobacteriia	__Flavobacteriales	__Flavobacteriaceae	__Chryseobacterium	__Chryseobacterium reticulitermitis	1	1	NR_156964.1	NA	NA	0	0	0	0	0	0	92	0	0	0	0	0	0	0	0	0	0	0	0	0	0	0	0	0	0	0	0	0	0	0	0	0	0	0	0	0
denovo158	Bacteria; __Bacteroidetes; __Bacteroidia; __Bacteroidales; __Prevotellaceae; __Prevotella; __Prevotella nanceiensis	Bacteria	__Bacteroidetes	__Bacteroidia	__Bacteroidales	__Prevotellaceae	__Prevotella	__Prevotella nanceiensis	1	1	NR_113114.1	NA	NA	0	0	59	0	0	0	0	0	0	0	0	0	0	0	0	0	0	0	0	0	0	200	0	0	0	0	0	0	0	0	0	0	0	0	0	0
denovo159	Bacteria; __Firmicutes; __Clostridia; __Clostridiales; __Clostridiales Family XIII. Incertae Sedis; __Casaltella; __Casaltella massiliensis	Bacteria	__Firmicutes	__Clostridia	__Clostridiales	__Clostridiales Family XIII. Incertae Sedis	__Casaltella	__Casaltella massiliensis	1	1	NR_133037.1	NA	NA	0	0	0	0	0	0	0	0	0	0	0	0	0	0	0	0	0	0	0	0	0	0	0	0	0	0	63	0	0	0	0	0	65	0	0	0
denovo160	Bacteria; __Proteobacteria; __Alphaproteobacteria; __Rhizobiales; __Methylobacteriaceae; __Methylobacterium; __Methylobacterium bullatum	Bacteria	__Proteobacteria	__Alphaproteobacteria	__Rhizobiales	__Methylobacteriaceae	__Methylobacterium	__Methylobacterium bullatum	1	1	NR_117561.1	NA	NA	0	0	0	0	0	0	0	0	6	0	0	0	0	0	0	0	0	0	0	0	0	0	0	0	0	0	0	0	0	0	0	0	76	0	0	0
denovo161	Bacteria; __Bacteroidetes; __Bacteroidia; __Bacteroidales; __Porphyromonadaceae; __Porphyromonas; __Porphyromonas catoniae	Bacteria	__Bacteroidetes	__Bacteroidia	__Bacteroidales	__Porphyromonadaceae	__Porphyromonas	__Porphyromonas catoniae	1	1	NR_113082.1	NA	NA	0	0	0	0	0	0	0	0	0	0	0	0	0	0	147	0	0	0	0	0	0	0	0	0	0	0	0	0	0	0	0	0	0	0	0	0
denovo162	Bacteria; __Bacteroidetes; __Cytophagia; __Cytophagales; __Cytophagaceae; __Fibrella; __Fibrella aestuarina	Bacteria	__Bacteroidetes	__Cytophagia	__Cytophagales	__Cytophagaceae	__Fibrella	__Fibrella aestuarina	1	1	NR_102471.1	NA	NA	0	0	0	0	0	0	0	0	0	0	0	0	0	0	0	0	0	0	0	0	0	0	0	0	0	0	0	0	0	0	0	0	0	0	0	0
denovo163	Bacteria; __Firmicutes; __Clostridia; __Clostridiales; __Ruminococcaceae; __Anaerofilum; __Anaerofilum pentosovorans	Bacteria	__Firmicutes	__Clostridia	__Clostridiales	__Ruminococcaceae	__Anaerofilum	__Anaerofilum pentosovorans	1	1	NR_029313.1	NA	NA	0	0	0	0	0	0	0	0	0	0	0	0	0	0	0	0	0	0	0	0	0	292	0	0	0	0	0	0	0	0	0	0	0	0	0	0
denovo164	Bacteria; __Proteobacteria; __Alphaproteobacteria; __Sphingomonadales; __Sphingomonadaceae; __Sphingomonas; __Sphingomonas olei	Bacteria	__Proteobacteria	__Alphaproteobacteria	__Sphingomonadales	__Sphingomonadaceae	__Sphingomonas	__Sphingomonas olei	1	1	NR_157757.1	NA	NA	0	1	141	0	0	0	0	0	36	0	0	0	0	0	0	0	0	0	0	0	0	0	0	0	0	0	0	0	0	0	0	0	0	0	0	0
denovo165	Bacteria; __Proteobacteria; __Alphaproteobacteria; __Rhodobacterales; __Rhodobacteraceae; __Rhodovulum; __Rhodovulum kholense	Bacteria	__Proteobacteria	__Alphaproteobacteria	__Rhodobacterales	__Rhodobacteraceae	__Rhodovulum	__Rhodovulum kholense	1	1	NR_042645.1	NA	NA	0	0	0	0	0	0	0	0	50	0	0	0	0	0	0	0	0	0	0	0	0	0	0	0	0	0	0	0	0	0	0	0	0	0	0	0
denovo166	Bacteria; __Firmicutes; __Bacilli; __Bacillales; __Paenibacillaceae; __Paenibacillus; __Paenibacillus silvae	Bacteria	__Firmicutes	__Bacilli	__Bacillales	__Paenibacillaceae	__Paenibacillus	__Paenibacillus silvae	1	1	NR_156836.1	NA	NA	0	0	0	0	0	0	24	0	0	0	0	0	0	0	0	0	0	0	0	0	0	0	0	0	58	0	0	0	0	0	0	0	0	0	0	10
denovo167	Bacteria; __Actinobacteria; __Actinobacteria; __Actinomycetales; __Actinomycetaceae; __Actinomyces; __Actinomyces oris	Bacteria	__Actinobacteria	__Actinobacteria	__Actinomycetales	__Actinomycetaceae	__Actinomyces	__Actinomyces oris	1	1	NR_104896.1	NA	NA	0	0	24	0	0	0	0	9	112	0	0	0	0	1	0	0	0	0	0	0	0	0	0	0	0	0	0	0	0	0	0	0	0	0	0	0
denovo168	Bacteria; __Fusobacteria; __Fusobacteriia; __Fusobacteriales; __Leptotrichiaceae; __Leptotrichia; __Leptotrichia goodfellowii	Bacteria	__Fusobacteria	__Fusobacteriia	__Fusobacteriales	__Leptotrichiaceae	__Leptotrichia	__Leptotrichia goodfellowii	1	1	NR_113160.1	NA	NA	0	0	0	0	0	0	0	0	0	0	0	0	0	0	0	0	0	0	0	0	0	0	0	0	0	0	0	0	0	0	0	0	0	0	0	0
denovo169	Bacteria; __Firmicutes; __Bacilli; __Bacillales; __Bacillaceae; __Anoxybacillus; __Anoxybacillus flavithermus	Bacteria	__Firmicutes	__Bacilli	__Bacillales	__Bacillaceae	__Anoxybacillus	__Anoxybacillus flavithermus	1	1	NR_117774.1	NA	NA	6	0	0	0	0	0	0	0	0	0	0	0	0	0	0	0	0	0	0	0	0	0	0	0	0	0	0	0	0	0	7	0	0	0	0	0
denovo170	Bacteria; __Verrucomicrobia; __Spartobacteria; __Chthoniobacterales; __Chthoniobacteraceae; __Chthoniobacter; __Chthoniobacter flavus	Bacteria	__Verrucomicrobia	__Spartobacteria	__Chthoniobacterales	__Chthoniobacteraceae	__Chthoniobacter	__Chthoniobacter flavus	1	1	NR_115225.1	NA	NA	0	0	0	0	0	0	0	0	0	0	0	0	0	0	157	0	0	0	0	0	0	0	0	0	0	0	0	0	0	0	0	0	0	0	0	0
denovo171	Bacteria; __Acidobacteria; __Vicinamibacteria; __; __Vicinamibacteraceae; __Vicinamibacter; __Vicinamibacter silvestris	Bacteria	__Acidobacteria	__Vicinamibacteria	__	__Vicinamibacteraceae	__Vicinamibacter	__Vicinamibacter silvestris	1	1	NR_151905.1	NA	NA	0	0	0	0	0	0	0	0	0	0	0	0	0	0	215	0	0	0	0	0	0	0	0	0	0	0	0	0	0	0	0	0	0	0	0	0
denovo172	Bacteria; __Proteobacteria; __Alphaproteobacteria; __Rhodobacterales; __Rhodobacteraceae; __Rhodobacter; __Rhodobacter blasticus	Bacteria	__Proteobacteria	__Alphaproteobacteria	__Rhodobacterales	__Rhodobacteraceae	__Rhodobacter	__Rhodobacter blasticus	1	1	NR_043735.1	NA	NA	0	0	0	0	0	0	0	0	0	0	0	0	0	0	0	0	0	0	0	0	0	0	0	0	0	0	0	0	0	0	0	0	0	0	0	0
denovo173	Bacteria; __Proteobacteria; __Alphaproteobacteria; __Rhodobacterales; __Rhodobacteraceae; __Paracoccus; __Paracoccus hibiscisoli	Bacteria	__Proteobacteria	__Alphaproteobacteria	__Rhodobacterales	__Rhodobacteraceae	__Paracoccus	__Paracoccus hibiscisoli	1	1	NR_157668.1	NA	NA	1	31	1	0	0	0	0	0	49	0	0	0	5	0	0	0	0	0	2	0	0	12	0	0	5	0	0	0	0	1	0	0	5	0	0	0
denovo174	Bacteria; __Proteobacteria; __Alphaproteobacteria; __Rhizobiales; __Rhizobiaceae; __Rhizobium; __Rhizobium zeae	Bacteria	__Proteobacteria	__Alphaproteobacteria	__Rhizobiales	__Rhizobiaceae	__Rhizobium	__Rhizobium zeae	1	1	NR_157662.1	NA	NA	0	0	0	0	0	0	0	0	0	0	0	0	0	0	0	0	0	0	0	0	0	0	0	0	0	0	0	0	0	0	0	0	96	0	0	0
denovo175	Bacteria; __Actinobacteria; __Actinobacteria; __Pseudonocardiales; __Pseudonocardiaceae; __Pseudonocardia; __Pseudonocardia yuanmonensis	Bacteria	__Actinobacteria	__Actinobacteria	__Pseudonocardiales	__Pseudonocardiaceae	__Pseudonocardia	__Pseudonocardia yuanmonensis	1	1	NR_109503.1	NA	NA	0	0	0	0	0	0	3	0	0	0	0	0	0	0	0	0	0	0	0	0	0	76	0	0	0	0	0	0	0	0	0	0	0	0	0	0
denovo176	Bacteria; __Firmicutes; __Tissierellia; __Tissierellales; __Peptoniphilaceae; __Anaerococcus; __Anaerococcus prevotii	Bacteria	__Firmicutes	__Tissierellia	__Tissierellales	__Peptoniphilaceae	__Anaerococcus	__Anaerococcus prevotii	1	1	NR_074575.1	NA	NA	9	0	36	0	0	0	0	0	0	0	0	0	3	0	0	0	0	0	0	0	0	0	0	0	0	0	97	0	0	6	20	0	23	1	1	36
denovo177	Bacteria; __Firmicutes; __Bacilli; __Bacillales; __Bacillaceae; __Bacillus; __Bacillus coagulans	Bacteria	__Firmicutes	__Bacilli	__Bacillales	__Bacillaceae	__Bacillus	__Bacillus coagulans	1	1	NR_041523.1	NA	NA	0	0	0	0	0	0	83	0	0	0	0	0	0	0	0	0	0	0	0	0	0	0	0	0	0	0	0	0	0	0	0	0	0	0	0	0
denovo178	Bacteria; __Proteobacteria; __Betaproteobacteria; __Burkholderiales; __Burkholderiaceae; __Burkholderia; __Burkholderia ambifaria	Bacteria	__Proteobacteria	__Betaproteobacteria	__Burkholderiales	__Burkholderiaceae	__Burkholderia	__Burkholderia ambifaria	1	1	NR_074687.1	NA	NA	0	29	118	0	0	0	0	6	66	0	0	0	0	0	0	0	0	0	0	0	0	14	0	0	0	0	0	0	0	0	0	0	0	0	0	0
denovo179	Bacteria; __Proteobacteria; __Alphaproteobacteria; __Rhizobiales; __Rhizobiaceae; __Shinella; __Shinella curvata	Bacteria	__Proteobacteria	__Alphaproteobacteria	__Rhizobiales	__Rhizobiaceae	__Shinella	__Shinella curvata	1	1	NR_152074.1	NA	NA	0	0	0	0	0	0	0	0	0	0	0	0	3	0	0	0	0	0	0	0	0	0	0	0	0	23	0	0	0	0	0	0	72	0	0	0
denovo180	Bacteria; __Proteobacteria; __Gammaproteobacteria; __Enterobacterales; __Erwiniaceae; __Mixta; __Mixta calida	Bacteria	__Proteobacteria	__Gammaproteobacteria	__Enterobacterales	__Erwiniaceae	__Mixta	__Mixta calida	1	1	NR_117304.1	NA	NA	0	0	0	0	0	0	0	120	0	0	0	0	0	0	0	0	0	0	0	0	0	0	0	0	0	0	0	0	0	0	0	0	0	0	0	0
denovo181	Bacteria; __Actinobacteria; __Actinobacteria; __Micrococcales; __Intrasporangiaceae; __Lapillicoccus; __Lapillicoccus jejuensis	Bacteria	__Actinobacteria	__Actinobacteria	__Micrococcales	__Intrasporangiaceae	__Lapillicoccus	__Lapillicoccus jejuensis	1	1	NR_042559.1	NA	NA	0	0	0	0	0	0	0	0	0	0	0	0	4	0	0	0	0	0	0	0	0	37	0	0	0	90	0	0	0	0	0	0	0	0	0	0
denovo182	Bacteria; __Actinobacteria; __Actinobacteria; __Streptomycetales; __Streptomycetaceae; __Streptomyces; __Streptomyces xanthophaeus	Bacteria	__Actinobacteria	__Actinobacteria	__Streptomycetales	__Streptomycetaceae	__Streptomyces	__Streptomyces xanthophaeus	1	1	NR_043848.1	NA	NA	0	0	0	0	0	0	0	0	0	0	0	0	0	0	0	0	0	0	0	0	0	0	0	0	0	0	2	0	0	0	0	0	115	0	0	0
denovo183	Bacteria; __Proteobacteria; __Alphaproteobacteria; __Rhizobiales; __Rhizobiaceae; __Rhizobium; __Rhizobium arenae	Bacteria	__Proteobacteria	__Alphaproteobacteria	__Rhizobiales	__Rhizobiaceae	__Rhizobium	__Rhizobium arenae	1	1	NR_157647.1	NA	NA	0	0	2	0	0	0	0	0	0	0	0	0	0	0	0	0	0	0	0	0	0	0	0	0	0	1	0	0	0	0	0	0	30	0	0	0
denovo184	Bacteria; __Firmicutes; __Bacilli; __Lactobacillales; __Carnobacteriaceae; __Granulicatella; __Granulicatella elegans	Bacteria	__Firmicutes	__Bacilli	__Lactobacillales	__Carnobacteriaceae	__Granulicatella	__Granulicatella elegans	1	1	NR_028682.1	NA	NA	0	0	17	0	0	0	0	0	0	0	0	0	1	0	0	0	0	0	0	0	0	0	0	0	0	0	25	0	0	2	0	0	24	0	0	0
denovo185	Bacteria; __Acidobacteria; __Blastocatellia; __Blastocatellales; __Blastocatellaceae; __Blastocatella; __Blastocatella fastidiosa	Bacteria	__Acidobacteria	__Blastocatellia	__Blastocatellales	__Blastocatellaceae	__Blastocatella	__Blastocatella fastidiosa	1	1	NR_118350.1	NA	NA	0	0	0	0	0	0	0	0	183	0	0	0	0	0	0	0	0	0	0	0	0	29	0	0	0	0	0	0	0	0	0	0	0	0	0	0
denovo186	Bacteria; __Firmicutes; __Bacilli; __Bacillales; __Bacillaceae; __Bacillus; __Bacillus velezensis	Bacteria	__Firmicutes	__Bacilli	__Bacillales	__Bacillaceae	__Bacillus	__Bacillus velezensis	1	1	NR_075005.2	NA	NA	0	0	0	0	0	0	0	0	149	0	0	0	0	0	0	0	0	0	0	0	0	0	0	0	0	0	0	0	0	0	0	0	0	0	0	0
denovo187	Bacteria; __Firmicutes; __Bacilli; __Bacillales; __Paenibacillaceae; __Paenibacillus; __Paenibacillus cavernae	Bacteria	__Firmicutes	__Bacilli	__Bacillales	__Paenibacillaceae	__Paenibacillus	__Paenibacillus cavernae	1	1	NR_148613.1	NA	NA	0	0	0	0	0	0	0	0	0	0	0	0	0	0	0	0	0	0	0	0	0	0	0	0	0	0	0	0	0	0	0	0	0	0	0	0
denovo188	Bacteria; __Firmicutes; __Bacilli; __Bacillales; __Bacillales Family X. Incertae Sedis; __Thermicanus; __Thermicanus aegyptius	Bacteria	__Firmicutes	__Bacilli	__Bacillales	__Bacillales Family X. Incertae Sedis	__Thermicanus	__Thermicanus aegyptius	1	1	NR_025355.1	NA	NA	0	63	0	0	0	0	2	0	0	0	0	0	0	0	0	0	0	0	0	0	0	0	0	0	0	65	0	0	0	0	0	0	0	6	0	0
denovo189	Bacteria; __Chloroflexi; __Thermomicrobia; __Sphaerobacterales; __Sphaerobacteraceae; __Sphaerobacter; __Sphaerobacter thermophilus	Bacteria	__Chloroflexi	__Thermomicrobia	__Sphaerobacterales	__Sphaerobacteraceae	__Sphaerobacter	__Sphaerobacter thermophilus	1	1	NR_074379.1	NA	NA	0	0	0	0	0	0	0	0	0	0	0	0	0	0	0	0	0	0	0	0	0	0	0	0	0	0	0	0	0	0	0	0	0	0	0	0
denovo190	Bacteria; __Actinobacteria; __Actinobacteria; __Corynebacteriales; __Nocardiaceae; __Nocardia; __Nocardia coeliaca	Bacteria	__Actinobacteria	__Actinobacteria	__Corynebacteriales	__Nocardiaceae	__Nocardia	__Nocardia coeliaca	1	1	NR_104776.1	NA	NA	0	0	34	0	0	0	0	0	0	0	0	0	0	0	0	0	0	0	0	0	0	0	0	0	0	0	0	0	0	0	0	0	32	19	0	0
denovo191	Bacteria; __Actinobacteria; __Actinobacteria; __Micrococcales; __Promicromonosporaceae; __Krasilnikoviella; __Krasilnikoviella muralis	Bacteria	__Actinobacteria	__Actinobacteria	__Micrococcales	__Promicromonosporaceae	__Krasilnikoviella	__Krasilnikoviella muralis	1	1	NR_156060.1	NA	NA	0	0	0	0	0	0	0	134	0	0	0	0	0	0	0	0	0	0	0	0	0	0	0	0	0	0	0	0	0	0	0	0	0	0	0	0
denovo192	Bacteria; __Firmicutes; __Tissierellia; __Tissierellales; __Peptoniphilaceae; __Anaerococcus; __Anaerococcus provencensis	Bacteria	__Firmicutes	__Tissierellia	__Tissierellales	__Peptoniphilaceae	__Anaerococcus	__Anaerococcus provencensis	1	1	NR_133036.1	NA	NA	0	0	0	0	0	0	0	57	0	0	0	0	3	0	0	0	0	0	0	0	0	0	0	0	0	0	2	0	0	0	0	0	20	0	0	0
denovo193	Bacteria; __Firmicutes; __Clostridia; __Clostridiales; __Lachnospiraceae; __Kineothrix; __Kineothrix alysoides	Bacteria	__Firmicutes	__Clostridia	__Clostridiales	__Lachnospiraceae	__Kineothrix	__Kineothrix alysoides	1	1	NR_156081.1	NA	NA	0	0	0	0	0	0	0	0	0	0	0	0	0	0	0	0	0	0	0	0	0	0	0	0	0	0	0	0	0	0	0	148	0	0	0	0
denovo194	Bacteria; __Proteobacteria; __Alphaproteobacteria; __Rhizobiales; __Methylocystaceae; __Pleomorphomonas; __Pleomorphomonas carboxyditropha	Bacteria	__Proteobacteria	__Alphaproteobacteria	__Rhizobiales	__Methylocystaceae	__Pleomorphomonas	__Pleomorphomonas carboxyditropha	1	1	NR_159100.1	NA	NA	0	0	0	0	0	0	0	0	0	0	0	0	0	0	0	0	0	0	0	0	0	0	0	0	0	0	0	0	0	0	0	0	53	0	0	0
denovo195	Bacteria; __Proteobacteria; __Gammaproteobacteria; __Pseudomonadales; __Pseudomonadaceae; __Pseudomonas; __Pseudomonas deceptionensis	Bacteria	__Proteobacteria	__Gammaproteobacteria	__Pseudomonadales	__Pseudomonadaceae	__Pseudomonas	__Pseudomonas deceptionensis	1	1	NR_117552.1	NA	NA	4	0	0	0	0	0	47	0	0	0	0	0	0	0	0	0	0	0	0	0	0	0	0	0	0	0	46	0	0	0	0	0	53	0	0	0
denovo196	Bacteria; __Firmicutes; __Bacilli; __Lactobacillales; __Lactobacillaceae; __Lactobacillus; __Lactobacillus acetotolerans	Bacteria	__Firmicutes	__Bacilli	__Lactobacillales	__Lactobacillaceae	__Lactobacillus	__Lactobacillus acetotolerans	1	1	NR_117073.1	NA	NA	0	0	0	0	0	0	0	0	0	0	0	0	0	0	0	0	0	0	0	0	0	0	0	0	0	0	0	0	0	0	0	0	0	0	0	0
denovo197	Bacteria; __Actinobacteria; __Actinobacteria; __Corynebacteriales; __Corynebacteriaceae; __Corynebacterium; __Corynebacterium glaucum	Bacteria	__Actinobacteria	__Actinobacteria	__Corynebacteriales	__Corynebacteriaceae	__Corynebacterium	__Corynebacterium glaucum	1	1	NR_028971.1	NA	NA	0	0	0	0	0	0	0	0	0	0	0	0	0	0	150	0	0	0	0	0	0	0	0	0	0	0	0	0	0	0	16	0	0	0	0	0
denovo198	Bacteria; __Firmicutes; __Bacilli; __Lactobacillales; __Lactobacillaceae; __Lactobacillus; __Lactobacillus mellis	Bacteria	__Firmicutes	__Bacilli	__Lactobacillales	__Lactobacillaceae	__Lactobacillus	__Lactobacillus mellis	1	1	NR_126249.1	NA	NA	0	0	0	0	0	0	0	0	0	0	0	0	0	0	0	0	0	0	0	0	0	0	0	0	0	0	0	0	0	0	0	0	0	0	0	0
denovo199	Bacteria; __Firmicutes; __Bacilli; __Lactobacillales; __Lactobacillaceae; __Lactobacillus; __Lactobacillus panis	Bacteria	__Firmicutes	__Bacilli	__Lactobacillales	__Lactobacillaceae	__Lactobacillus	__Lactobacillus panis	1	1	NR_026310.1	NA	NA	0	0	0	0	0	0	0	0	0	0	0	0	0	0	0	0	0	0	0	0	0	0	0	0	133	0	0	0	0	0	0	0	0	0	0	0
denovo200	Bacteria; __Bacteroidetes; __Bacteroidia; __Bacteroidales; __Prevotellaceae; __Prevotella; __Prevotella jejuni	Bacteria	__Bacteroidetes	__Bacteroidia	__Bacteroidales	__Prevotellaceae	__Prevotella	__Prevotella jejuni	1	1	NR_109628.1	NA	NA	0	0	0	0	0	0	0	0	0	0	0	0	0	0	0	0	0	0	0	0	0	0	0	0	4	0	0	0	0	0	0	31	21	0	0	0
denovo201	Bacteria; __Proteobacteria; __Gammaproteobacteria; __Pasteurellales; __Pasteurellaceae; __Aggregatibacter; __Aggregatibacter segnis	Bacteria	__Proteobacteria	__Gammaproteobacteria	__Pasteurellales	__Pasteurellaceae	__Aggregatibacter	__Aggregatibacter segnis	1	1	NR_044749.1	NA	NA	0	0	0	0	0	0	0	0	0	0	0	0	0	0	98	0	0	0	0	0	0	0	0	0	0	0	0	0	0	0	0	0	0	0	0	0
denovo202	Bacteria; __Proteobacteria; __Gammaproteobacteria; __Xanthomonadales; __Rhodanobacteraceae; __Frateuria; __Frateuria aurantia	Bacteria	__Proteobacteria	__Gammaproteobacteria	__Xanthomonadales	__Rhodanobacteraceae	__Frateuria	__Frateuria aurantia	1	1	NR_074107.1	NA	NA	0	55	0	0	0	0	0	0	0	0	0	0	0	0	0	0	0	0	0	0	0	0	0	0	0	29	0	0	0	0	0	0	0	0	0	0
denovo203	Bacteria; __Actinobacteria; __Actinobacteria; __Corynebacteriales; __Mycobacteriaceae; __Mycolicibacterium; __Mycolicibacterium iranicum	Bacteria	__Actinobacteria	__Actinobacteria	__Corynebacteriales	__Mycobacteriaceae	__Mycolicibacterium	__Mycolicibacterium iranicum	1	1	NR_117909.1	NA	NA	0	48	0	0	0	0	0	0	33	0	0	0	0	0	0	0	0	0	0	0	0	0	0	0	5	0	0	0	0	0	0	0	0	0	0	0
denovo204	Bacteria; __Proteobacteria; __Alphaproteobacteria; __Sphingomonadales; __Sphingomonadaceae; __Novosphingobium; __Novosphingobium arabidopsis	Bacteria	__Proteobacteria	__Alphaproteobacteria	__Sphingomonadales	__Sphingomonadaceae	__Novosphingobium	__Novosphingobium arabidopsis	1	1	NR_133799.1	NA	NA	0	0	0	0	0	0	0	0	93	0	0	0	0	0	0	0	0	0	0	0	0	0	0	0	0	0	0	0	0	0	0	0	0	0	0	0
denovo205	Bacteria; __Firmicutes; __Bacilli; __Bacillales; __Bacillaceae; __Bacillus; __Bacillus infernus	Bacteria	__Firmicutes	__Bacilli	__Bacillales	__Bacillaceae	__Bacillus	__Bacillus infernus	1	1	NR_027227.1	NA	NA	0	0	0	0	0	0	0	0	0	0	0	0	0	0	0	0	0	0	47	0	0	0	0	0	0	0	0	0	0	0	0	0	0	0	0	0
denovo206	Bacteria; __Bacteroidetes; __Bacteroidia; __Bacteroidales; __Porphyromonadaceae; __Porphyromonas; __Porphyromonas pasteri	Bacteria	__Bacteroidetes	__Bacteroidia	__Bacteroidales	__Porphyromonadaceae	__Porphyromonas	__Porphyromonas pasteri	1	1	NR_136788.1	NA	NA	0	0	0	0	0	0	0	0	0	0	0	0	0	0	0	0	0	0	0	0	0	67	0	0	0	0	0	0	0	0	0	0	0	0	0	0
denovo207	Bacteria; __Proteobacteria; __Gammaproteobacteria; __Pseudomonadales; __Moraxellaceae; __Cavicella; __Cavicella subterranea	Bacteria	__Proteobacteria	__Gammaproteobacteria	__Pseudomonadales	__Moraxellaceae	__Cavicella	__Cavicella subterranea	1	1	NR_145637.1	NA	NA	0	0	0	0	0	0	0	0	0	0	0	0	0	0	0	0	0	0	0	0	0	0	0	0	0	0	0	0	0	0	0	0	0	0	0	0
denovo208	Bacteria; __Proteobacteria; __Alphaproteobacteria; __Sphingomonadales; __Sphingomonadaceae; __Sphingorhabdus; __Sphingorhabdus rigui	Bacteria	__Proteobacteria	__Alphaproteobacteria	__Sphingomonadales	__Sphingomonadaceae	__Sphingorhabdus	__Sphingorhabdus rigui	1	1	NR_117995.1	NA	NA	0	0	0	0	0	0	0	0	0	0	0	0	0	0	0	0	0	0	0	0	0	0	0	0	0	0	0	0	0	0	0	0	0	0	0	0
denovo209	Bacteria; __Actinobacteria; __Thermoleophilia; __Solirubrobacterales; __Conexibacteraceae; __Conexibacter; __Conexibacter arvalis	Bacteria	__Actinobacteria	__Thermoleophilia	__Solirubrobacterales	__Conexibacteraceae	__Conexibacter	__Conexibacter arvalis	1	1	NR_113264.1	NA	NA	0	0	0	0	0	0	0	0	0	0	0	0	0	0	0	0	0	0	0	0	0	0	0	0	0	0	0	0	0	0	0	0	0	0	0	0
denovo210	Bacteria; __Actinobacteria; __Actinobacteria; __Bifidobacteriales; __Bifidobacteriaceae; __Bifidobacterium; __Bifidobacterium pseudocatenulatum	Bacteria	__Actinobacteria	__Actinobacteria	__Bifidobacteriales	__Bifidobacteriaceae	__Bifidobacterium	__Bifidobacterium pseudocatenulatum	1	1	NR_037117.1	NA	NA	0	0	0	0	0	0	9	0	0	0	0	0	0	0	0	0	0	0	0	0	0	0	0	0	0	0	0	0	0	0	0	0	0	0	0	7
denovo211	Bacteria; __Actinobacteria; __Acidimicrobiia; __Acidimicrobiales; __Ilumatobacteraceae; __Ilumatobacter; __Ilumatobacter fluminis	Bacteria	__Actinobacteria	__Acidimicrobiia	__Acidimicrobiales	__Ilumatobacteraceae	__Ilumatobacter	__Ilumatobacter fluminis	1	1	NR_041633.1	NA	NA	0	0	0	0	0	0	0	0	0	0	0	0	0	0	0	0	0	0	0	0	0	0	0	0	0	0	0	0	0	0	0	32	54	0	0	0
denovo212	; __; __; __; __; __; __		__	__	__	__	__	__	1	1	NA	NA	NA	0	0	0	0	0	0	0	0	0	0	0	0	0	23	0	0	0	0	0	0	0	0	0	0	0	0	0	0	0	0	0	39	0	0	0	0
denovo213	Bacteria; __Actinobacteria; __Acidimicrobiia; __Acidimicrobiales; __Acidimicrobiaceae; __Aciditerrimonas; __Aciditerrimonas ferrireducens	Bacteria	__Actinobacteria	__Acidimicrobiia	__Acidimicrobiales	__Acidimicrobiaceae	__Aciditerrimonas	__Aciditerrimonas ferrireducens	1	1	NR_112972.1	NA	NA	0	0	0	0	0	0	0	0	114	0	0	0	0	0	0	0	0	0	0	0	0	0	0	0	0	0	0	0	0	0	0	0	0	0	0	0
denovo214	; __; __; __; __; __; __		__	__	__	__	__	__	1	1	NA	NA	NA	0	0	0	0	0	0	0	0	0	0	0	0	0	0	0	0	0	0	0	0	0	73	0	0	0	0	0	0	0	0	0	0	0	0	0	0
denovo215	Bacteria; __Fusobacteria; __Fusobacteriia; __Fusobacteriales; __Fusobacteriaceae; __Fusobacterium; __Fusobacterium nucleatum	Bacteria	__Fusobacteria	__Fusobacteriia	__Fusobacteriales	__Fusobacteriaceae	__Fusobacterium	__Fusobacterium nucleatum	1	1	NR_113141.1	NA	NA	0	4	0	0	0	0	0	26	0	0	0	0	0	0	0	0	0	0	0	0	0	101	0	0	0	0	0	0	0	0	0	0	0	0	0	0
denovo216	Bacteria; __Actinobacteria; __Actinobacteria; __Corynebacteriales; __Mycobacteriaceae; __Mycolicibacterium; __Mycolicibacterium doricum	Bacteria	__Actinobacteria	__Actinobacteria	__Corynebacteriales	__Mycobacteriaceae	__Mycolicibacterium	__Mycolicibacterium doricum	1	1	NR_025099.1	NA	NA	0	0	0	0	0	0	0	0	76	0	0	0	0	0	0	0	0	0	0	0	0	0	0	0	0	0	0	0	0	0	0	0	0	0	0	0
denovo217	Bacteria; __Actinobacteria; __Actinobacteria; __Nakamurellales; __Nakamurellaceae; __Nakamurella; __Nakamurella flavida	Bacteria	__Actinobacteria	__Actinobacteria	__Nakamurellales	__Nakamurellaceae	__Nakamurella	__Nakamurella flavida	1	1	NR_043717.1	NA	NA	0	0	0	0	0	0	0	0	0	0	0	0	0	0	0	0	0	0	0	0	0	0	0	0	0	0	0	0	0	0	0	0	0	0	0	0
denovo218	Bacteria; __Proteobacteria; __Gammaproteobacteria; __Enterobacterales; __Yersiniaceae; __Serratia; __Serratia oryzae	Bacteria	__Proteobacteria	__Gammaproteobacteria	__Enterobacterales	__Yersiniaceae	__Serratia	__Serratia oryzae	1	1	NR_157762.1	NA	NA	0	0	0	15	0	0	0	0	0	0	13	0	0	0	0	1	6	5	0	0	0	0	3	0	0	0	0	0	0	0	0	0	0	0	0	0
denovo219	Bacteria; __Bacteroidetes; __Chitinophagia; __Chitinophagales; __Chitinophagaceae; __Heliimonas; __Heliimonas saccharivorans	Bacteria	__Bacteroidetes	__Chitinophagia	__Chitinophagales	__Chitinophagaceae	__Heliimonas	__Heliimonas saccharivorans	1	1	NR_135701.1	NA	NA	0	0	0	0	0	0	0	0	0	0	0	0	0	0	0	0	0	0	0	0	0	0	0	0	0	0	0	0	0	0	0	0	0	0	0	0
denovo220	Bacteria; __Firmicutes; __Bacilli; __Bacillales; __Bacillaceae; __Bacillus; __Bacillus siralis	Bacteria	__Firmicutes	__Bacilli	__Bacillales	__Bacillaceae	__Bacillus	__Bacillus siralis	1	1	NR_028709.1	NA	NA	0	0	0	0	0	0	0	0	0	0	0	0	0	0	0	0	0	0	0	0	0	0	0	0	0	0	0	0	0	0	0	0	64	0	0	0
denovo221	Bacteria; __Firmicutes; __Bacilli; __Bacillales; __Paenibacillaceae; __Brevibacillus; __Brevibacillus laterosporus	Bacteria	__Firmicutes	__Bacilli	__Bacillales	__Paenibacillaceae	__Brevibacillus	__Brevibacillus laterosporus	1	1	NR_112727.1	NA	NA	0	0	0	0	0	0	0	0	0	0	1	0	0	0	0	0	0	0	0	0	0	0	0	0	0	0	0	0	0	0	0	0	59	0	0	0
denovo222	Bacteria; __Proteobacteria; __Betaproteobacteria; __Burkholderiales; __; __Aquabacterium; __Aquabacterium parvum	Bacteria	__Proteobacteria	__Betaproteobacteria	__Burkholderiales	__	__Aquabacterium	__Aquabacterium parvum	1	1	NR_024874.1	NA	NA	0	0	0	0	0	0	0	0	0	0	0	0	0	0	60	0	0	0	18	0	0	0	0	0	0	0	0	0	0	0	0	0	0	0	0	0
denovo223	Bacteria; __Actinobacteria; __Actinobacteria; __Geodermatophilales; __Geodermatophilaceae; __Blastococcus; __Blastococcus aggregatus	Bacteria	__Actinobacteria	__Actinobacteria	__Geodermatophilales	__Geodermatophilaceae	__Blastococcus	__Blastococcus aggregatus	1	1	NR_114864.1	NA	NA	0	0	100	0	0	0	0	2	0	0	0	0	0	0	0	0	0	0	0	0	0	0	0	0	0	0	0	0	0	0	0	0	0	0	0	13
denovo224	Bacteria; __Proteobacteria; __Gammaproteobacteria; __Pseudomonadales; __Moraxellaceae; __Acinetobacter; __Acinetobacter schindleri	Bacteria	__Proteobacteria	__Gammaproteobacteria	__Pseudomonadales	__Moraxellaceae	__Acinetobacter	__Acinetobacter schindleri	1	1	NR_025412.1	NA	NA	0	0	0	0	0	0	0	29	0	0	0	0	0	0	0	0	0	0	0	0	0	0	0	0	0	0	0	0	0	0	0	0	0	0	0	0
denovo225	Bacteria; __Firmicutes; __Bacilli; __Bacillales; __Bacillaceae; __Bacillus; __Bacillus hisashii	Bacteria	__Firmicutes	__Bacilli	__Bacillales	__Bacillaceae	__Bacillus	__Bacillus hisashii	1	1	NR_144578.1	NA	NA	0	0	8	0	0	0	8	0	0	0	0	0	0	0	0	0	0	0	0	0	0	0	0	0	0	0	0	0	0	0	0	0	22	0	0	0
denovo226	Bacteria; __Actinobacteria; __Actinobacteria; __Micrococcales; __Brevibacteriaceae; __Brevibacterium; __Brevibacterium paucivorans	Bacteria	__Actinobacteria	__Actinobacteria	__Micrococcales	__Brevibacteriaceae	__Brevibacterium	__Brevibacterium paucivorans	1	1	NR_025375.1	NA	NA	1	0	0	0	0	0	0	0	0	0	0	0	0	0	0	0	0	0	0	0	0	0	0	0	0	69	0	0	0	0	0	0	0	9	0	0
denovo227	Bacteria; __Firmicutes; __Tissierellia; __; __; __; __[Bacteroides] coagulans	Bacteria	__Firmicutes	__Tissierellia	__	__	__	__[Bacteroides] coagulans	1	1	NR_104900.1	NA	NA	3	0	0	0	0	0	66	0	0	0	0	0	0	0	0	0	0	0	0	0	0	0	0	0	0	0	0	0	0	0	0	0	0	0	0	0
denovo228	Bacteria; __Firmicutes; __Bacilli; __Bacillales; __Bacillaceae; __Anoxybacillus; __Anoxybacillus tepidamans	Bacteria	__Firmicutes	__Bacilli	__Bacillales	__Bacillaceae	__Anoxybacillus	__Anoxybacillus tepidamans	1	1	NR_116985.1	NA	NA	0	0	0	0	0	0	0	0	0	0	0	0	0	0	0	0	0	0	0	0	0	0	0	0	0	9	19	0	0	0	0	0	0	13	0	0
denovo229	; __; __; __; __; __; __		__	__	__	__	__	__	1	1	NA	NA	NA	0	0	0	0	0	0	0	0	0	0	0	0	0	0	0	0	0	0	0	0	0	161	0	0	0	0	0	0	0	0	0	0	0	0	0	0
denovo230	Bacteria; __Actinobacteria; __Actinobacteria; __Actinomycetales; __Actinomycetaceae; __Schaalia; __Schaalia odontolytica	Bacteria	__Actinobacteria	__Actinobacteria	__Actinomycetales	__Actinomycetaceae	__Schaalia	__Schaalia odontolytica	1	1	NR_114395.1	NA	NA	0	0	98	0	0	0	7	28	0	0	0	0	0	0	0	0	0	0	0	0	0	63	0	0	0	0	0	0	0	0	0	0	5	0	0	0
denovo231	Bacteria; __Firmicutes; __Bacilli; __Lactobacillales; __Leuconostocaceae; __Leuconostoc; __Leuconostoc mesenteroides	Bacteria	__Firmicutes	__Bacilli	__Lactobacillales	__Leuconostocaceae	__Leuconostoc	__Leuconostoc mesenteroides	1	1	NR_157602.1	NA	NA	0	0	0	0	0	0	0	78	0	0	0	0	0	0	0	0	0	0	0	1	0	0	0	0	0	0	0	0	0	0	0	0	0	0	0	0
denovo232	Bacteria; __Actinobacteria; __Actinobacteria; __Corynebacteriales; __Nocardiaceae; __Rhodococcus; __Rhodococcus pedocola	Bacteria	__Actinobacteria	__Actinobacteria	__Corynebacteriales	__Nocardiaceae	__Rhodococcus	__Rhodococcus pedocola	1	1	NR_149270.1	NA	NA	0	0	0	0	0	0	0	0	0	0	0	0	0	0	0	0	0	0	0	0	0	0	0	0	0	0	0	0	0	0	0	0	0	0	0	0
denovo233	Bacteria; __Firmicutes; __Bacilli; __Bacillales; __Staphylococcaceae; __Staphylococcus; __Staphylococcus sciuri	Bacteria	__Firmicutes	__Bacilli	__Bacillales	__Staphylococcaceae	__Staphylococcus	__Staphylococcus sciuri	1	1	NR_041328.1	NA	NA	0	0	0	0	0	0	0	0	63	0	0	0	0	0	0	0	0	0	0	0	0	0	0	0	0	0	0	0	0	0	0	0	0	0	0	0
denovo234	Bacteria; __Bacteroidetes; __Flavobacteriia; __Flavobacteriales; __Flavobacteriaceae; __Chryseobacterium; __Chryseobacterium taklimakanense	Bacteria	__Bacteroidetes	__Flavobacteriia	__Flavobacteriales	__Flavobacteriaceae	__Chryseobacterium	__Chryseobacterium taklimakanense	1	1	NR_044561.1	NA	NA	0	0	0	0	0	0	0	0	0	0	0	0	4	0	0	0	0	0	0	0	0	0	0	0	0	0	0	0	0	0	21	0	0	2	0	0
denovo235	Bacteria; __Actinobacteria; __Acidimicrobiia; __Acidimicrobiales; __Ilumatobacteraceae; __Ilumatobacter; __Ilumatobacter fluminis	Bacteria	__Actinobacteria	__Acidimicrobiia	__Acidimicrobiales	__Ilumatobacteraceae	__Ilumatobacter	__Ilumatobacter fluminis	1	1	NR_041633.1	NA	NA	0	0	0	0	0	0	0	0	0	0	0	0	0	0	0	0	0	0	0	0	0	0	0	0	0	0	0	0	0	0	0	0	0	0	0	0
denovo236	Bacteria; __Acidobacteria; __Blastocatellia; __Blastocatellales; __Blastocatellaceae; __Stenotrophobacter; __Stenotrophobacter terrae	Bacteria	__Acidobacteria	__Blastocatellia	__Blastocatellales	__Blastocatellaceae	__Stenotrophobacter	__Stenotrophobacter terrae	1	1	NR_146023.1	NA	NA	0	0	0	0	0	0	0	0	0	0	0	0	0	0	0	0	0	0	0	0	0	0	0	0	0	0	0	0	0	0	0	0	0	0	0	0
denovo237	Bacteria; __Proteobacteria; __Alphaproteobacteria; __Rhizobiales; __Rhizobiaceae; __Gellertiella; __Gellertiella hungarica	Bacteria	__Proteobacteria	__Alphaproteobacteria	__Rhizobiales	__Rhizobiaceae	__Gellertiella	__Gellertiella hungarica	1	1	NR_159172.1	NA	NA	0	0	0	0	0	0	0	0	0	0	0	0	0	0	0	0	0	0	0	0	0	0	0	0	0	0	0	0	0	0	0	0	0	0	0	0
denovo238	Bacteria; __Proteobacteria; __Epsilonproteobacteria; __Campylobacterales; __Helicobacteraceae; __Helicobacter; __Helicobacter pylori	Bacteria	__Proteobacteria	__Epsilonproteobacteria	__Campylobacterales	__Helicobacteraceae	__Helicobacter	__Helicobacter pylori	1	1	NR_044761.1	NA	NA	0	0	0	0	0	0	0	0	0	0	0	0	0	0	0	0	0	0	0	0	0	0	0	0	0	0	0	0	0	0	0	61	0	0	0	0
denovo239	Bacteria; __Proteobacteria; __Gammaproteobacteria; __Pseudomonadales; __Moraxellaceae; __Moraxella; __Moraxella nonliquefaciens	Bacteria	__Proteobacteria	__Gammaproteobacteria	__Pseudomonadales	__Moraxellaceae	__Moraxella	__Moraxella nonliquefaciens	1	1	NR_104938.1	NA	NA	0	0	0	0	0	0	0	0	0	0	0	0	0	0	73	0	0	0	0	0	0	0	0	0	0	0	0	0	0	0	0	0	0	0	0	0
denovo240	Bacteria; __Proteobacteria; __Alphaproteobacteria; __Caulobacterales; __Caulobacteraceae; __Brevundimonas; __Brevundimonas lenta	Bacteria	__Proteobacteria	__Alphaproteobacteria	__Caulobacterales	__Caulobacteraceae	__Brevundimonas	__Brevundimonas lenta	1	1	NR_044186.1	NA	NA	0	0	0	0	0	0	0	0	0	0	0	0	0	0	0	0	0	0	0	0	0	0	0	0	0	0	0	0	0	0	0	0	0	0	0	16
denovo241	Bacteria; __Actinobacteria; __Actinobacteria; __Micrococcales; __Micrococcaceae; __Arthrobacter; __Arthrobacter gandavensis	Bacteria	__Actinobacteria	__Actinobacteria	__Micrococcales	__Micrococcaceae	__Arthrobacter	__Arthrobacter gandavensis	1	1	NR_025475.1	NA	NA	0	0	0	0	0	0	0	0	0	0	0	0	0	0	0	0	0	0	0	0	0	0	0	0	0	0	3	0	0	0	0	0	0	0	0	0
denovo242	Bacteria; __Firmicutes; __Clostridia; __Clostridiales; __Lachnospiraceae; __Blautia; __[Ruminococcus] torques	Bacteria	__Firmicutes	__Clostridia	__Clostridiales	__Lachnospiraceae	__Blautia	__[Ruminococcus] torques	1	1	NR_036777.1	NA	NA	0	0	0	0	0	0	0	0	0	0	0	0	0	0	0	0	0	0	0	0	0	0	0	0	0	0	0	0	0	0	0	41	0	0	0	0
denovo243	Bacteria; __Bacteroidetes; __Bacteroidia; __Bacteroidales; __Porphyromonadaceae; __Porphyromonas; __Porphyromonas bennonis	Bacteria	__Bacteroidetes	__Bacteroidia	__Bacteroidales	__Porphyromonadaceae	__Porphyromonas	__Porphyromonas bennonis	1	1	NR_044491.1	NA	NA	0	0	0	0	0	0	0	0	0	0	0	0	0	0	0	0	0	0	0	0	0	0	0	0	0	40	0	0	0	0	0	0	0	0	0	0
denovo244	Bacteria; __Proteobacteria; __Alphaproteobacteria; __Sphingomonadales; __Sphingomonadaceae; __Novosphingobium; __Novosphingobium sediminicola	Bacteria	__Proteobacteria	__Alphaproteobacteria	__Sphingomonadales	__Sphingomonadaceae	__Novosphingobium	__Novosphingobium sediminicola	1	1	NR_108298.1	NA	NA	0	0	0	0	0	0	0	0	0	0	0	0	0	0	0	0	0	0	0	0	0	0	0	0	0	0	0	0	0	0	0	0	0	0	0	0
denovo245	Bacteria; __Proteobacteria; __Gammaproteobacteria; __Pseudomonadales; __Pseudomonadaceae; __Pseudomonas; __Pseudomonas marginalis	Bacteria	__Proteobacteria	__Gammaproteobacteria	__Pseudomonadales	__Pseudomonadaceae	__Pseudomonas	__Pseudomonas marginalis	1	1	NR_117821.1	NA	NA	0	0	0	0	0	0	0	0	0	0	1	0	0	0	0	20	0	27	0	0	0	0	0	0	0	0	0	0	0	0	0	0	0	0	0	0
denovo246	Bacteria; __Proteobacteria; __Gammaproteobacteria; __Pseudomonadales; __Moraxellaceae; __Acinetobacter; __Acinetobacter dispersus	Bacteria	__Proteobacteria	__Gammaproteobacteria	__Pseudomonadales	__Moraxellaceae	__Acinetobacter	__Acinetobacter dispersus	1	1	NR_148844.1	NA	NA	0	0	0	0	0	0	0	0	0	0	0	0	0	0	0	0	0	0	0	0	0	0	0	0	0	0	0	0	0	0	0	0	0	0	0	0
denovo247	Bacteria; __Proteobacteria; __Alphaproteobacteria; __Rhizobiales; __Bradyrhizobiaceae; __Bradyrhizobium; __Bradyrhizobium namibiense	Bacteria	__Proteobacteria	__Alphaproteobacteria	__Rhizobiales	__Bradyrhizobiaceae	__Bradyrhizobium	__Bradyrhizobium namibiense	1	1	NR_159233.1	NA	NA	0	0	19	0	0	0	0	0	11	0	0	0	0	0	0	0	0	0	26	0	0	0	0	0	0	10	0	0	0	0	0	0	0	0	0	0
denovo248	Bacteria; __Cyanobacteria; __; __Nostocales; __Calotrichaceae; __Dulcicalothrix; __Dulcicalothrix necridiiformans	Bacteria	__Cyanobacteria	__	__Nostocales	__Calotrichaceae	__Dulcicalothrix	__Dulcicalothrix necridiiformans	1	1	NR_164867.1	NA	NA	0	0	0	0	0	0	0	0	0	0	0	0	0	0	0	0	0	0	0	0	0	0	0	0	0	0	0	0	0	0	0	67	0	0	0	0
denovo249	Bacteria; __Bacteroidetes; __Bacteroidia; __Bacteroidales; __Prevotellaceae; __Prevotella; __Prevotella timonensis	Bacteria	__Bacteroidetes	__Bacteroidia	__Bacteroidales	__Prevotellaceae	__Prevotella	__Prevotella timonensis	1	1	NR_113123.1	NA	NA	0	0	27	0	0	0	0	0	0	0	0	0	0	0	0	0	0	0	0	0	0	0	0	0	0	0	0	0	0	0	0	0	0	0	0	3
denovo250	Bacteria; __Bacteroidetes; __Bacteroidia; __Bacteroidales; __Bacteroidaceae; __Bacteroides; __Bacteroides uniformis	Bacteria	__Bacteroidetes	__Bacteroidia	__Bacteroidales	__Bacteroidaceae	__Bacteroides	__Bacteroides uniformis	1	1	NR_112945.1	NA	NA	0	0	0	0	0	0	0	0	0	0	0	0	0	0	0	0	0	0	0	0	0	0	0	0	0	0	0	0	0	0	0	65	0	0	0	0
denovo251	Bacteria; __Proteobacteria; __Gammaproteobacteria; __Enterobacterales; __Yersiniaceae; __Serratia; __Serratia oryzae	Bacteria	__Proteobacteria	__Gammaproteobacteria	__Enterobacterales	__Yersiniaceae	__Serratia	__Serratia oryzae	1	1	NR_157762.1	NA	NA	0	0	0	2	0	0	0	0	0	33	0	32	1	1	0	4	0	1	0	0	1	0	1	58	0	0	0	0	0	0	0	0	0	0	0	0
denovo252	Bacteria; __Proteobacteria; __Alphaproteobacteria; __Rhodospirillales; __Geminicoccaceae; __Geminicoccus; __Geminicoccus roseus	Bacteria	__Proteobacteria	__Alphaproteobacteria	__Rhodospirillales	__Geminicoccaceae	__Geminicoccus	__Geminicoccus roseus	1	1	NR_042567.1	NA	NA	0	0	49	0	0	0	0	0	23	0	0	0	0	0	0	0	0	0	0	0	0	0	0	0	0	0	0	0	0	0	0	0	0	0	0	0
denovo253	Bacteria; __Bacteroidetes; __Flavobacteriia; __Flavobacteriales; __Flavobacteriaceae; __Chryseobacterium; __Chryseobacterium profundimaris	Bacteria	__Bacteroidetes	__Flavobacteriia	__Flavobacteriales	__Flavobacteriaceae	__Chryseobacterium	__Chryseobacterium profundimaris	1	1	NR_136427.1	NA	NA	0	0	0	0	0	0	0	0	0	0	0	0	0	0	0	0	0	0	0	0	0	16	0	0	0	0	0	0	0	0	0	0	0	0	0	0
denovo254	Bacteria; __Proteobacteria; __Alphaproteobacteria; __Caulobacterales; __Caulobacteraceae; __Phenylobacterium; __Phenylobacterium muchangponense	Bacteria	__Proteobacteria	__Alphaproteobacteria	__Caulobacterales	__Caulobacteraceae	__Phenylobacterium	__Phenylobacterium muchangponense	1	1	NR_117783.1	NA	NA	0	0	0	0	0	0	0	0	0	0	0	0	0	0	0	0	0	0	0	0	0	0	0	0	0	0	0	0	0	0	0	0	0	0	0	0
denovo255	Bacteria; __Proteobacteria; __Alphaproteobacteria; __Caulobacterales; __Caulobacteraceae; __Caulobacter; __Caulobacter mirabilis	Bacteria	__Proteobacteria	__Alphaproteobacteria	__Caulobacterales	__Caulobacteraceae	__Caulobacter	__Caulobacter mirabilis	1	1	NR_041964.1	NA	NA	0	0	0	0	0	0	0	0	0	0	0	0	0	0	0	0	0	0	0	0	0	0	0	0	0	0	0	0	0	0	0	0	2	0	0	0
denovo256	Bacteria; __Proteobacteria; __Gammaproteobacteria; __Enterobacterales; __Yersiniaceae; __Yersinia; __Yersinia enterocolitica	Bacteria	__Proteobacteria	__Gammaproteobacteria	__Enterobacterales	__Yersiniaceae	__Yersinia	__Yersinia enterocolitica	1	1	NR_116785.1	NA	NA	0	0	0	45	1	0	0	0	0	0	24	0	0	0	0	13	12	3	0	0	0	0	3	0	0	0	0	0	0	1	0	0	0	0	0	0
denovo257	Bacteria; __Proteobacteria; __Betaproteobacteria; __Burkholderiales; __Comamonadaceae; __Curvibacter; __Curvibacter fontanus	Bacteria	__Proteobacteria	__Betaproteobacteria	__Burkholderiales	__Comamonadaceae	__Curvibacter	__Curvibacter fontanus	1	1	NR_112221.1	NA	NA	0	8	0	0	0	0	0	55	0	0	0	0	0	0	60	0	0	0	0	0	0	0	0	0	0	0	0	0	0	0	0	0	0	0	0	0
denovo258	Bacteria; __Firmicutes; __Tissierellia; __Tissierellales; __Peptoniphilaceae; __Peptoniphilus; __Peptoniphilus asaccharolyticus	Bacteria	__Firmicutes	__Tissierellia	__Tissierellales	__Peptoniphilaceae	__Peptoniphilus	__Peptoniphilus asaccharolyticus	1	1	NR_113382.1	NA	NA	0	0	0	0	0	0	0	12	0	0	0	0	0	0	0	0	0	0	0	0	0	0	0	0	0	0	0	0	0	0	0	0	0	0	0	0
denovo259	Bacteria; __Chloroflexi; __Thermomicrobia; __Sphaerobacterales; __Sphaerobacteraceae; __Sphaerobacter; __Sphaerobacter thermophilus	Bacteria	__Chloroflexi	__Thermomicrobia	__Sphaerobacterales	__Sphaerobacteraceae	__Sphaerobacter	__Sphaerobacter thermophilus	1	1	NR_074379.1	NA	NA	0	0	0	0	0	0	0	0	42	0	0	0	0	0	0	0	0	0	0	0	0	0	0	0	0	0	0	0	0	0	0	0	0	0	0	0
denovo260	Bacteria; __Firmicutes; __Bacilli; __Bacillales; __Listeriaceae; __Brochothrix; __Brochothrix thermosphacta	Bacteria	__Firmicutes	__Bacilli	__Bacillales	__Listeriaceae	__Brochothrix	__Brochothrix thermosphacta	1	1	NR_113587.1	NA	NA	0	0	0	0	0	0	0	0	23	0	0	0	0	0	0	0	0	0	0	0	0	0	0	0	0	0	0	0	0	0	0	0	0	0	0	0
denovo261	Bacteria; __Proteobacteria; __Gammaproteobacteria; __Pseudomonadales; __Moraxellaceae; __Moraxella; __Moraxella porci	Bacteria	__Proteobacteria	__Gammaproteobacteria	__Pseudomonadales	__Moraxellaceae	__Moraxella	__Moraxella porci	1	1	NR_116918.1	NA	NA	0	0	0	0	0	0	0	0	0	0	0	0	0	0	0	0	0	0	0	0	0	0	0	0	0	0	0	0	0	0	0	0	0	0	0	0
denovo262	Bacteria; __Proteobacteria; __Alphaproteobacteria; __Rhodobacterales; __Rhodobacteraceae; __Rubellimicrobium; __Rubellimicrobium rubrum	Bacteria	__Proteobacteria	__Alphaproteobacteria	__Rhodobacterales	__Rhodobacteraceae	__Rubellimicrobium	__Rubellimicrobium rubrum	1	1	NR_164992.1	NA	NA	0	0	0	0	0	0	0	0	0	0	0	0	0	0	0	0	0	0	0	0	0	0	0	0	0	0	0	0	0	0	0	0	0	0	0	0
denovo263	Bacteria; __Proteobacteria; __Gammaproteobacteria; __Orbales; __Orbaceae; __Gilliamella; __Gilliamella apicola	Bacteria	__Proteobacteria	__Gammaproteobacteria	__Orbales	__Orbaceae	__Gilliamella	__Gilliamella apicola	1	1	NR_121727.1	NA	NA	0	0	0	0	0	0	0	0	0	0	0	0	0	0	0	0	0	0	0	0	0	0	0	0	0	0	0	0	0	0	0	0	0	0	0	0
denovo264	Bacteria; __Bacteroidetes; __Bacteroidia; __Bacteroidales; __Prevotellaceae; __Prevotella; __Prevotella stercorea	Bacteria	__Bacteroidetes	__Bacteroidia	__Bacteroidales	__Prevotellaceae	__Prevotella	__Prevotella stercorea	1	1	NR_041364.1	NA	NA	0	0	0	0	0	0	0	0	0	0	0	0	0	0	0	0	0	0	0	0	0	106	0	0	0	0	0	0	0	0	0	0	0	0	0	0
denovo265	Bacteria; __Actinobacteria; __Actinobacteria; __Micrococcales; __Promicromonosporaceae; __Isoptericola; __Isoptericola cucumis	Bacteria	__Actinobacteria	__Actinobacteria	__Micrococcales	__Promicromonosporaceae	__Isoptericola	__Isoptericola cucumis	1	1	NR_151863.1	NA	NA	9	0	0	0	0	0	0	0	0	0	0	0	0	0	0	0	0	0	0	0	0	35	0	0	0	0	0	0	0	0	0	0	0	0	0	0
denovo266	Bacteria; __Firmicutes; __Tissierellia; __Tissierellales; __Peptoniphilaceae; __Anaerococcus; __Anaerococcus nagyae	Bacteria	__Firmicutes	__Tissierellia	__Tissierellales	__Peptoniphilaceae	__Anaerococcus	__Anaerococcus nagyae	1	1	NR_146835.1	NA	NA	0	0	0	0	0	0	0	0	0	0	0	0	0	0	102	0	0	0	0	0	0	0	0	0	0	0	0	0	0	0	0	0	0	0	0	0
denovo267	Bacteria; __Actinobacteria; __Actinobacteria; __Micrococcales; __Micrococcaceae; __Kocuria; __Kocuria palustris	Bacteria	__Actinobacteria	__Actinobacteria	__Micrococcales	__Micrococcaceae	__Kocuria	__Kocuria palustris	1	1	NR_026451.1	NA	NA	0	3	13	0	0	0	0	0	0	0	0	0	0	0	44	0	0	0	0	0	0	0	0	0	0	0	0	0	0	0	0	0	0	2	0	0
denovo268	Bacteria; __Proteobacteria; __Alphaproteobacteria; __Caulobacterales; __Caulobacteraceae; __Phenylobacterium; __Phenylobacterium aquaticum	Bacteria	__Proteobacteria	__Alphaproteobacteria	__Caulobacterales	__Caulobacteraceae	__Phenylobacterium	__Phenylobacterium aquaticum	1	1	NR_152001.1	NA	NA	0	0	0	0	0	0	0	0	0	0	0	0	0	1	0	0	0	0	0	0	0	0	0	0	0	0	15	0	0	2	0	0	4	4	0	22
denovo269	Bacteria; __Proteobacteria; __Gammaproteobacteria; __Enterobacterales; __Yersiniaceae; __Yersinia; __Yersinia enterocolitica	Bacteria	__Proteobacteria	__Gammaproteobacteria	__Enterobacterales	__Yersiniaceae	__Yersinia	__Yersinia enterocolitica	1	1	NR_104903.1	NA	NA	0	0	0	1	0	0	0	0	0	0	0	0	0	0	0	0	0	0	0	0	0	0	0	0	0	0	3	4	11	0	0	0	0	0	7	0
denovo270	Bacteria; __Bacteroidetes; __Flavobacteriia; __Flavobacteriales; __Flavobacteriaceae; __Chryseobacterium; __Chryseobacterium shandongense	Bacteria	__Bacteroidetes	__Flavobacteriia	__Flavobacteriales	__Flavobacteriaceae	__Chryseobacterium	__Chryseobacterium shandongense	1	1	NR_135879.1	NA	NA	0	49	0	0	0	0	0	0	0	0	0	0	0	0	0	0	0	0	0	0	0	0	0	0	0	0	0	0	0	0	0	0	0	0	0	0
denovo271	Bacteria; __Proteobacteria; __Gammaproteobacteria; __Chromatiales; __Chromatiaceae; __Thiohalocapsa; __Thiohalocapsa halophila	Bacteria	__Proteobacteria	__Gammaproteobacteria	__Chromatiales	__Chromatiaceae	__Thiohalocapsa	__Thiohalocapsa halophila	1	1	NR_028863.1	NA	NA	0	0	0	0	0	0	0	0	42	0	0	0	0	0	0	0	0	0	0	0	0	0	0	0	0	0	0	0	0	0	0	0	0	0	0	0
denovo272	Bacteria; __Firmicutes; __Clostridia; __Clostridiales; __Clostridiaceae; __Clostridium; __Clostridium swellfunianum	Bacteria	__Firmicutes	__Clostridia	__Clostridiales	__Clostridiaceae	__Clostridium	__Clostridium swellfunianum	1	1	NR_126179.1	NA	NA	0	0	0	0	0	0	19	0	0	0	0	0	0	0	0	0	0	0	0	0	0	0	0	0	0	0	0	0	0	0	0	0	0	0	0	0
denovo273	Bacteria; __Bacteroidetes; __Flavobacteriia; __Flavobacteriales; __Flavobacteriaceae; __Elizabethkingia; __Elizabethkingia anophelis	Bacteria	__Bacteroidetes	__Flavobacteriia	__Flavobacteriales	__Flavobacteriaceae	__Elizabethkingia	__Elizabethkingia anophelis	1	1	NR_136481.1	NA	NA	0	0	0	0	0	0	0	0	0	0	0	1	0	0	0	0	0	0	0	0	0	0	0	0	0	0	0	0	1	0	0	0	0	0	10	0
denovo274	Bacteria; __Firmicutes; __Clostridia; __Clostridiales; __; __Levyella; __Levyella massiliensis	Bacteria	__Firmicutes	__Clostridia	__Clostridiales	__	__Levyella	__Levyella massiliensis	1	1	NR_133039.1	NA	NA	0	0	0	0	0	0	0	0	0	0	0	0	0	0	0	0	0	0	0	0	0	0	0	0	0	0	0	0	0	0	0	0	0	0	0	0
denovo275	; __; __; __; __; __; __		__	__	__	__	__	__	1	1	NA	NA	NA	0	0	0	0	0	0	0	44	0	0	0	0	0	0	0	0	0	0	0	0	0	0	0	0	0	0	0	0	0	0	0	0	0	0	0	0
denovo276	Bacteria; __Bacteroidetes; __Bacteroidia; __Bacteroidales; __Prevotellaceae; __Prevotella; __Prevotella buccalis	Bacteria	__Bacteroidetes	__Bacteroidia	__Bacteroidales	__Prevotellaceae	__Prevotella	__Prevotella buccalis	1	1	NR_113098.1	NA	NA	0	0	0	0	0	0	0	0	0	0	0	0	0	0	0	0	0	0	0	0	0	0	0	0	0	0	15	0	0	0	0	0	8	0	0	0
denovo277	Bacteria; __Bacteroidetes; __Bacteroidia; __Bacteroidales; __Prevotellaceae; __Prevotella; __Prevotella melaninogenica	Bacteria	__Bacteroidetes	__Bacteroidia	__Bacteroidales	__Prevotellaceae	__Prevotella	__Prevotella melaninogenica	1	1	NR_102895.1	NA	NA	0	19	8	0	0	0	0	0	0	0	0	0	0	0	0	0	0	0	0	0	0	11	0	0	0	0	0	0	0	0	0	0	0	0	0	0
denovo278	Bacteria; __Bacteroidetes; __Chitinophagia; __Chitinophagales; __Chitinophagaceae; __Vibrionimonas; __Vibrionimonas magnilacihabitans	Bacteria	__Bacteroidetes	__Chitinophagia	__Chitinophagales	__Chitinophagaceae	__Vibrionimonas	__Vibrionimonas magnilacihabitans	1	1	NR_133888.1	NA	NA	0	0	0	0	0	0	0	0	0	0	0	0	0	0	0	0	0	0	0	0	0	0	0	0	0	0	0	0	0	0	0	11	48	0	0	0
denovo279	Bacteria; __Proteobacteria; __Alphaproteobacteria; __Rhodospirillales; __Acetobacteraceae; __Belnapia; __Belnapia soli	Bacteria	__Proteobacteria	__Alphaproteobacteria	__Rhodospirillales	__Acetobacteraceae	__Belnapia	__Belnapia soli	1	1	NR_109456.1	NA	NA	0	0	0	0	0	0	0	0	0	0	0	0	0	0	0	0	0	0	0	0	0	0	0	0	0	0	0	0	0	0	0	0	0	0	0	0
denovo280	Bacteria; __Firmicutes; __Negativicutes; __Acidaminococcales; __Acidaminococcaceae; __Phascolarctobacterium; __Phascolarctobacterium succinatutens	Bacteria	__Firmicutes	__Negativicutes	__Acidaminococcales	__Acidaminococcaceae	__Phascolarctobacterium	__Phascolarctobacterium succinatutens	1	1	NR_112902.1	NA	NA	0	0	0	0	0	0	0	0	0	0	0	0	0	0	0	0	0	0	0	0	0	0	0	0	0	0	0	0	0	0	0	50	0	0	0	0
denovo281	Bacteria; __Proteobacteria; __Gammaproteobacteria; __Pseudomonadales; __Pseudomonadaceae; __Pseudomonas; __Pseudomonas stutzeri	Bacteria	__Proteobacteria	__Gammaproteobacteria	__Pseudomonadales	__Pseudomonadaceae	__Pseudomonas	__Pseudomonas stutzeri	1	1	NR_103934.2	NA	NA	0	0	33	0	0	0	0	0	0	0	0	0	0	0	0	0	0	0	0	0	0	0	0	0	0	0	0	0	0	0	0	25	0	0	0	0
denovo282	Bacteria; __Firmicutes; __Clostridia; __Clostridiales; __Lachnospiraceae; __Blautia; __[Ruminococcus] gnavus	Bacteria	__Firmicutes	__Clostridia	__Clostridiales	__Lachnospiraceae	__Blautia	__[Ruminococcus] gnavus	1	1	NR_036800.1	NA	NA	1	0	29	0	0	0	0	0	0	0	0	0	0	0	0	0	0	0	0	0	0	0	0	0	0	0	0	0	0	0	0	0	0	0	0	0
denovo283	Bacteria; __Proteobacteria; __Oligoflexia; __Bacteriovoracales; __Bacteriovoracaceae; __Peredibacter; __Peredibacter starrii	Bacteria	__Proteobacteria	__Oligoflexia	__Bacteriovoracales	__Bacteriovoracaceae	__Peredibacter	__Peredibacter starrii	1	1	NR_024943.1	NA	NA	0	0	0	0	0	0	0	0	0	0	0	0	0	0	0	0	0	0	0	0	0	0	0	0	0	0	0	0	0	0	0	0	0	0	0	0
denovo284	Bacteria; __Proteobacteria; __Alphaproteobacteria; __Sphingomonadales; __Sphingomonadaceae; __Sphingomonas; __Sphingomonas fennica	Bacteria	__Proteobacteria	__Alphaproteobacteria	__Sphingomonadales	__Sphingomonadaceae	__Sphingomonas	__Sphingomonas fennica	1	1	NR_041948.1	NA	NA	0	0	0	0	0	0	0	0	0	0	0	0	0	0	0	0	0	0	0	0	0	16	0	0	0	0	0	0	0	0	0	0	0	0	0	0
denovo285	Bacteria; __Proteobacteria; __Gammaproteobacteria; __Enterobacterales; __Morganellaceae; __Morganella; __Morganella morganii	Bacteria	__Proteobacteria	__Gammaproteobacteria	__Enterobacterales	__Morganellaceae	__Morganella	__Morganella morganii	1	1	NR_113580.1	NA	NA	0	0	0	0	0	0	0	0	0	0	0	0	0	0	0	0	0	0	0	0	0	0	0	0	32	0	0	0	0	0	0	0	0	0	0	0
denovo286	Bacteria; __Actinobacteria; __Actinobacteria; __Micromonosporales; __Micromonosporaceae; __Krasilnikovia; __Krasilnikovia cinnamomea	Bacteria	__Actinobacteria	__Actinobacteria	__Micromonosporales	__Micromonosporaceae	__Krasilnikovia	__Krasilnikovia cinnamomea	1	1	NR_041337.1	NA	NA	0	0	0	0	0	0	0	0	0	0	0	0	0	0	0	0	0	0	0	0	0	0	0	0	0	0	30	0	0	0	0	0	0	0	0	0
denovo287	Bacteria; __Proteobacteria; __Alphaproteobacteria; __Rhodospirillales; __Acetobacteraceae; __Roseomonas; __Roseomonas aquatica	Bacteria	__Proteobacteria	__Alphaproteobacteria	__Rhodospirillales	__Acetobacteraceae	__Roseomonas	__Roseomonas aquatica	1	1	NR_042501.1	NA	NA	0	0	0	0	0	0	0	0	0	0	0	0	0	0	0	0	0	0	24	0	0	0	0	0	0	0	0	0	0	0	0	0	0	0	0	0
denovo288	Bacteria; __Proteobacteria; __Alphaproteobacteria; __Rhizobiales; __Hyphomicrobiaceae; __Pedomicrobium; __Pedomicrobium ferrugineum	Bacteria	__Proteobacteria	__Alphaproteobacteria	__Rhizobiales	__Hyphomicrobiaceae	__Pedomicrobium	__Pedomicrobium ferrugineum	1	1	NR_104840.1	NA	NA	0	0	0	0	0	0	0	0	0	0	0	0	0	0	0	0	0	0	0	0	0	0	0	0	0	0	0	0	0	0	0	0	0	0	0	0
denovo289	Bacteria; __Actinobacteria; __Actinobacteria; __Pseudonocardiales; __Pseudonocardiaceae; __Pseudonocardia; __Pseudonocardia oroxyli	Bacteria	__Actinobacteria	__Actinobacteria	__Pseudonocardiales	__Pseudonocardiaceae	__Pseudonocardia	__Pseudonocardia oroxyli	1	1	NR_043737.1	NA	NA	0	0	0	0	0	0	0	0	0	0	0	0	0	0	0	0	0	0	0	0	0	0	0	0	0	0	0	0	0	0	0	0	0	0	0	0
denovo290	Bacteria; __Proteobacteria; __Betaproteobacteria; __Neisseriales; __Chromobacteriaceae; __Aquitalea; __Aquitalea pelogenes	Bacteria	__Proteobacteria	__Betaproteobacteria	__Neisseriales	__Chromobacteriaceae	__Aquitalea	__Aquitalea pelogenes	1	1	NR_148648.1	NA	NA	0	0	0	0	0	0	0	0	0	0	0	0	0	0	0	0	0	0	0	0	0	0	0	0	0	0	0	0	0	0	0	0	0	0	0	0
denovo291	Bacteria; __Proteobacteria; __Alphaproteobacteria; __; __; __Phreatobacter; __Phreatobacter oligotrophus	Bacteria	__Proteobacteria	__Alphaproteobacteria	__	__	__Phreatobacter	__Phreatobacter oligotrophus	1	1	NR_133817.1	NA	NA	0	0	0	0	0	0	0	0	54	0	0	0	0	0	0	0	0	0	0	0	0	0	0	0	0	0	0	0	0	0	0	0	2	0	0	0
denovo292	Bacteria; __Bacteroidetes; __Bacteroidia; __Bacteroidales; __Prevotellaceae; __Prevotella; __Prevotella bivia	Bacteria	__Bacteroidetes	__Bacteroidia	__Bacteroidales	__Prevotellaceae	__Prevotella	__Prevotella bivia	1	1	NR_113096.1	NA	NA	0	0	0	0	0	0	0	0	0	0	0	0	0	0	0	0	0	0	0	0	0	0	0	0	0	0	4	0	0	8	0	0	16	0	0	0
denovo293	Bacteria; __Bacteroidetes; __Bacteroidia; __Bacteroidales; __Rikenellaceae; __Tidjanibacter; __Tidjanibacter massiliensis	Bacteria	__Bacteroidetes	__Bacteroidia	__Bacteroidales	__Rikenellaceae	__Tidjanibacter	__Tidjanibacter massiliensis	1	1	NR_147372.1	NA	NA	0	0	0	0	0	0	0	0	0	0	0	0	0	0	0	0	0	0	0	0	0	0	0	0	0	0	0	0	0	0	0	41	0	0	0	0
denovo294	Bacteria; __Proteobacteria; __Alphaproteobacteria; __Rhizobiales; __Chelatococcaceae; __Chelatococcus; __Chelatococcus composti	Bacteria	__Proteobacteria	__Alphaproteobacteria	__Rhizobiales	__Chelatococcaceae	__Chelatococcus	__Chelatococcus composti	1	1	NR_156158.1	NA	NA	0	0	0	0	0	0	0	0	0	0	0	0	0	0	0	0	0	0	0	0	0	0	0	0	0	0	0	0	0	0	0	0	0	0	0	0
denovo295	Bacteria; __Proteobacteria; __Alphaproteobacteria; __Sphingomonadales; __Sphingomonadaceae; __Sphingobium; __Sphingobium rhizovicinum	Bacteria	__Proteobacteria	__Alphaproteobacteria	__Sphingomonadales	__Sphingomonadaceae	__Sphingobium	__Sphingobium rhizovicinum	1	1	NR_044226.1	NA	NA	0	0	0	0	0	0	0	0	0	0	0	0	0	0	0	0	0	0	0	0	0	0	0	0	0	0	0	0	0	0	0	0	0	32	0	0
denovo296	Bacteria; __Firmicutes; __Tissierellia; __Tissierellales; __Peptoniphilaceae; __Anaerococcus; __Anaerococcus provencensis	Bacteria	__Firmicutes	__Tissierellia	__Tissierellales	__Peptoniphilaceae	__Anaerococcus	__Anaerococcus provencensis	1	1	NR_133036.1	NA	NA	0	0	0	0	0	0	0	0	0	0	0	0	5	0	0	0	0	0	0	0	0	0	0	0	0	0	0	0	0	0	0	29	0	0	0	0
denovo297	Bacteria; __Proteobacteria; __Betaproteobacteria; __Burkholderiales; __Comamonadaceae; __Simplicispira; __Simplicispira metamorpha	Bacteria	__Proteobacteria	__Betaproteobacteria	__Burkholderiales	__Comamonadaceae	__Simplicispira	__Simplicispira metamorpha	1	1	NR_113643.1	NA	NA	0	0	0	0	0	0	0	0	0	0	0	0	0	0	0	0	0	0	0	0	0	0	0	0	0	0	0	0	0	0	0	0	0	0	0	0
denovo298	Bacteria; __Proteobacteria; __Alphaproteobacteria; __; __; __Phreatobacter; __Phreatobacter oligotrophus	Bacteria	__Proteobacteria	__Alphaproteobacteria	__	__	__Phreatobacter	__Phreatobacter oligotrophus	1	1	NR_133817.1	NA	NA	0	0	0	0	0	0	0	0	0	0	0	0	0	0	0	0	0	0	0	0	0	0	0	0	0	0	0	0	0	0	0	0	11	0	0	0
denovo299	Bacteria; __Bacteroidetes; __Cytophagia; __Cytophagales; __Cytophagaceae; __Marinoscillum; __Marinoscillum luteum	Bacteria	__Bacteroidetes	__Cytophagia	__Cytophagales	__Cytophagaceae	__Marinoscillum	__Marinoscillum luteum	1	1	NR_108992.1	NA	NA	0	0	0	0	0	0	41	0	0	0	0	0	0	0	0	0	0	0	0	0	0	0	0	0	0	0	0	0	0	0	0	0	0	0	0	0
denovo300	Bacteria; __Proteobacteria; __Gammaproteobacteria; __Aeromonadales; __Aeromonadaceae; __Aeromonas; __Aeromonas sanarellii	Bacteria	__Proteobacteria	__Gammaproteobacteria	__Aeromonadales	__Aeromonadaceae	__Aeromonas	__Aeromonas sanarellii	1	1	NR_116584.1	NA	NA	0	0	0	0	0	0	0	0	0	0	0	0	0	0	0	0	0	0	0	0	0	0	0	0	0	0	0	0	0	0	0	0	0	0	0	0
denovo301	Bacteria; __Proteobacteria; __Alphaproteobacteria; __Rhizobiales; __Methylobacteriaceae; __Methylorubrum; __Methylorubrum populi	Bacteria	__Proteobacteria	__Alphaproteobacteria	__Rhizobiales	__Methylobacteriaceae	__Methylorubrum	__Methylorubrum populi	1	1	NR_074257.1	NA	NA	0	0	0	0	0	0	0	0	44	0	0	0	0	0	0	0	0	0	0	0	0	0	0	0	0	0	0	0	0	0	7	0	0	1	0	0
denovo302	Bacteria; __Firmicutes; __Clostridia; __Clostridiales; __Lachnospiraceae; __Tyzzerella; __[Clostridium] colinum	Bacteria	__Firmicutes	__Clostridia	__Clostridiales	__Lachnospiraceae	__Tyzzerella	__[Clostridium] colinum	1	1	NR_026151.1	NA	NA	0	0	0	0	0	0	0	0	38	0	0	0	0	0	0	0	0	0	0	0	0	0	0	0	0	0	0	0	0	0	0	0	0	0	0	0
denovo303	Bacteria; __Bacteroidetes; __Chitinophagia; __Chitinophagales; __Chitinophagaceae; __Rurimicrobium; __Rurimicrobium arvi	Bacteria	__Bacteroidetes	__Chitinophagia	__Chitinophagales	__Chitinophagaceae	__Rurimicrobium	__Rurimicrobium arvi	1	1	NR_159218.1	NA	NA	0	0	0	0	0	0	0	0	0	0	0	0	0	0	0	0	0	0	0	0	0	0	0	0	0	0	0	0	0	0	0	0	0	0	0	0
denovo304	Bacteria; __Actinobacteria; __Actinobacteria; __Corynebacteriales; __Corynebacteriaceae; __Corynebacterium; __Corynebacterium durum	Bacteria	__Actinobacteria	__Actinobacteria	__Corynebacteriales	__Corynebacteriaceae	__Corynebacterium	__Corynebacterium durum	1	1	NR_026539.1	NA	NA	0	32	0	0	0	0	0	0	1	0	0	0	0	0	28	0	0	0	0	0	0	0	0	0	0	0	0	0	0	0	0	0	0	0	0	0
denovo305	Bacteria; __Firmicutes; __Bacilli; __Lactobacillales; __Streptococcaceae; __Streptococcus; __Streptococcus agalactiae	Bacteria	__Firmicutes	__Bacilli	__Lactobacillales	__Streptococcaceae	__Streptococcus	__Streptococcus agalactiae	1	1	NR_113262.1	NA	NA	0	0	0	0	0	0	0	0	0	0	0	0	0	0	0	0	0	0	0	0	0	0	0	0	0	0	0	0	0	0	0	0	26	0	0	0
denovo306	Bacteria; __Proteobacteria; __Gammaproteobacteria; __Pasteurellales; __Pasteurellaceae; __Haemophilus; __Haemophilus parahaemolyticus	Bacteria	__Proteobacteria	__Gammaproteobacteria	__Pasteurellales	__Pasteurellaceae	__Haemophilus	__Haemophilus parahaemolyticus	1	1	NR_114764.1	NA	NA	0	7	11	0	0	0	0	0	0	0	0	0	0	0	0	0	0	0	0	0	0	0	0	0	0	0	0	0	0	0	0	0	0	0	0	0
denovo307	Bacteria; __Acidobacteria; __Acidobacteriia; __Bryobacterales; __Bryobacteraceae; __Paludibaculum; __Paludibaculum fermentans	Bacteria	__Acidobacteria	__Acidobacteriia	__Bryobacterales	__Bryobacteraceae	__Paludibaculum	__Paludibaculum fermentans	1	1	NR_134120.1	NA	NA	0	0	0	0	0	0	0	0	0	0	0	0	0	0	0	0	0	0	0	0	0	0	0	0	0	0	0	0	0	0	0	0	0	0	0	0
denovo308	Bacteria; __Firmicutes; __Clostridia; __Clostridiales; __Lachnospiraceae; __Acetatifactor; __Acetatifactor muris	Bacteria	__Firmicutes	__Clostridia	__Clostridiales	__Lachnospiraceae	__Acetatifactor	__Acetatifactor muris	1	1	NR_117905.1	NA	NA	0	0	0	0	0	0	0	0	0	0	0	0	0	0	0	0	0	0	0	0	0	0	0	0	0	0	0	0	0	0	0	52	0	0	0	0
denovo309	Bacteria; __Firmicutes; __Bacilli; __Bacillales; __Thermoactinomycetaceae; __Laceyella; __Laceyella sacchari	Bacteria	__Firmicutes	__Bacilli	__Bacillales	__Thermoactinomycetaceae	__Laceyella	__Laceyella sacchari	1	1	NR_041997.1	NA	NA	0	0	0	0	0	0	0	0	0	0	0	0	0	0	0	0	0	0	0	0	0	0	0	0	0	0	0	0	0	0	0	0	0	0	0	43
denovo310	Bacteria; __Firmicutes; __Bacilli; __Lactobacillales; __Lactobacillaceae; __Lactobacillus; __Lactobacillus ingluviei	Bacteria	__Firmicutes	__Bacilli	__Lactobacillales	__Lactobacillaceae	__Lactobacillus	__Lactobacillus ingluviei	1	1	NR_028810.1	NA	NA	0	0	0	0	0	0	0	0	0	0	0	0	0	0	0	0	0	0	0	0	0	0	0	0	0	0	0	0	0	0	0	0	0	0	0	0
denovo311	Bacteria; __Actinobacteria; __Actinobacteria; __Corynebacteriales; __Corynebacteriaceae; __Corynebacterium; __Corynebacterium testudinoris	Bacteria	__Actinobacteria	__Actinobacteria	__Corynebacteriales	__Corynebacteriaceae	__Corynebacterium	__Corynebacterium testudinoris	1	1	NR_025434.1	NA	NA	0	0	7	0	0	0	0	0	0	0	0	0	0	0	0	0	0	0	0	0	0	0	0	0	0	0	0	0	0	0	0	0	0	0	0	0
denovo312	Bacteria; __Actinobacteria; __Actinobacteria; __Micrococcales; __Brevibacteriaceae; __Brevibacterium; __Brevibacterium casei	Bacteria	__Actinobacteria	__Actinobacteria	__Micrococcales	__Brevibacteriaceae	__Brevibacterium	__Brevibacterium casei	1	1	NR_041996.1	NA	NA	0	0	0	0	0	0	0	0	4	0	0	0	0	0	0	0	0	0	0	0	0	0	0	0	0	0	0	0	0	0	0	0	25	0	0	0
denovo313	Bacteria; __Actinobacteria; __Actinobacteria; __Streptosporangiales; __Streptosporangiaceae; __Streptosporangium; __Streptosporangium jiaoheense	Bacteria	__Actinobacteria	__Actinobacteria	__Streptosporangiales	__Streptosporangiaceae	__Streptosporangium	__Streptosporangium jiaoheense	1	1	NR_149273.1	NA	NA	0	0	0	0	0	0	0	0	0	0	0	0	0	0	0	0	0	0	0	0	0	0	0	0	0	0	0	0	0	0	0	0	0	0	0	0
denovo314	; __; __; __; __; __; __		__	__	__	__	__	__	1	1	NA	NA	NA	0	0	0	0	0	0	16	0	0	0	0	0	0	0	0	0	0	0	0	0	0	0	0	0	0	0	0	0	0	0	0	0	0	0	0	0
denovo315	Bacteria; __Firmicutes; __Tissierellia; __Tissierellales; __Peptoniphilaceae; __Murdochiella; __Murdochiella massiliensis	Bacteria	__Firmicutes	__Tissierellia	__Tissierellales	__Peptoniphilaceae	__Murdochiella	__Murdochiella massiliensis	1	1	NR_148568.1	NA	NA	0	0	0	0	0	0	0	0	0	0	0	0	0	0	0	0	0	0	0	0	0	0	0	0	0	0	0	0	0	0	0	0	0	0	0	0
denovo316	Bacteria; __Bacteroidetes; __Flavobacteriia; __Flavobacteriales; __Flavobacteriaceae; __Chryseobacterium; __Chryseobacterium hominis	Bacteria	__Bacteroidetes	__Flavobacteriia	__Flavobacteriales	__Flavobacteriaceae	__Chryseobacterium	__Chryseobacterium hominis	1	1	NR_042517.2	NA	NA	0	0	0	0	0	0	0	0	36	0	0	0	0	0	0	0	0	0	0	0	0	0	0	0	0	0	0	0	0	0	0	0	0	0	0	0
denovo317	; __; __; __; __; __; __		__	__	__	__	__	__	1	1	NA	NA	NA	0	0	0	0	0	0	0	0	2	0	0	0	0	0	0	0	0	0	0	0	0	0	0	0	0	0	0	0	0	0	0	0	0	0	0	0
denovo318	Bacteria; __Firmicutes; __Tissierellia; __Tissierellales; __Peptoniphilaceae; __Anaerococcus; __Anaerococcus octavius	Bacteria	__Firmicutes	__Tissierellia	__Tissierellales	__Peptoniphilaceae	__Anaerococcus	__Anaerococcus octavius	1	1	NR_026360.1	NA	NA	2	0	0	0	0	0	0	0	0	0	0	0	5	0	0	0	0	0	0	0	0	0	0	0	0	0	0	0	0	0	0	0	0	0	0	0
denovo319	Bacteria; __Proteobacteria; __Betaproteobacteria; __Rhodocyclales; __Zoogloeaceae; __Azoarcus; __Azoarcus olearius	Bacteria	__Proteobacteria	__Betaproteobacteria	__Rhodocyclales	__Zoogloeaceae	__Azoarcus	__Azoarcus olearius	1	1	NR_108183.1	NA	NA	0	0	0	0	0	0	0	0	59	0	0	0	0	0	0	0	0	0	0	0	0	0	0	0	0	0	0	0	0	0	0	0	0	0	0	0
denovo320	Bacteria; __Actinobacteria; __Actinobacteria; __Micrococcales; __Bogoriellaceae; __Georgenia; __Georgenia deserti	Bacteria	__Actinobacteria	__Actinobacteria	__Micrococcales	__Bogoriellaceae	__Georgenia	__Georgenia deserti	1	1	NR_163612.1	NA	NA	0	0	0	0	0	0	0	0	0	0	0	0	0	0	0	0	0	0	0	0	0	7	0	0	0	0	0	0	0	0	0	0	0	0	0	0
denovo321	Bacteria; __Firmicutes; __Clostridia; __Clostridiales; __Lachnospiraceae; __Lachnoclostridium; __Lachnoclostridium pacaense	Bacteria	__Firmicutes	__Clostridia	__Clostridiales	__Lachnospiraceae	__Lachnoclostridium	__Lachnoclostridium pacaense	1	1	NR_147396.1	NA	NA	0	0	0	0	0	0	0	0	0	0	0	0	0	0	0	0	0	0	0	0	0	0	0	0	0	0	0	0	0	0	0	11	0	0	0	0
denovo322	Bacteria; __Firmicutes; __Clostridia; __Clostridiales; __Ruminococcaceae; __Faecalibacterium; __Faecalibacterium prausnitzii	Bacteria	__Firmicutes	__Clostridia	__Clostridiales	__Ruminococcaceae	__Faecalibacterium	__Faecalibacterium prausnitzii	1	1	NR_028961.1	NA	NA	0	0	0	0	0	0	0	0	0	0	0	0	0	0	0	0	0	0	0	0	0	0	0	0	0	0	0	0	0	0	0	29	0	0	0	0
denovo323	Bacteria; __Bacteroidetes; __Cytophagia; __Cytophagales; __Cytophagaceae; __Flectobacillus; __Flectobacillus roseus	Bacteria	__Bacteroidetes	__Cytophagia	__Cytophagales	__Cytophagaceae	__Flectobacillus	__Flectobacillus roseus	1	1	NR_116312.1	NA	NA	0	0	0	0	0	0	0	0	0	0	0	0	0	0	0	0	0	0	0	0	0	0	0	0	0	0	0	0	0	0	0	0	0	0	0	0
denovo324	Bacteria; __Firmicutes; __Negativicutes; __Veillonellales; __Veillonellaceae; __Dialister; __Dialister propionicifaciens	Bacteria	__Firmicutes	__Negativicutes	__Veillonellales	__Veillonellaceae	__Dialister	__Dialister propionicifaciens	1	1	NR_043231.1	NA	NA	0	4	0	0	0	0	0	47	0	0	0	0	0	0	0	0	0	0	0	0	0	0	0	0	0	0	0	0	0	0	0	0	0	0	0	0
denovo325	Bacteria; __Proteobacteria; __Gammaproteobacteria; __Pseudomonadales; __Moraxellaceae; __Psychrobacter; __Psychrobacter cibarius	Bacteria	__Proteobacteria	__Gammaproteobacteria	__Pseudomonadales	__Moraxellaceae	__Psychrobacter	__Psychrobacter cibarius	1	1	NR_043057.1	NA	NA	7	0	13	0	0	0	0	0	0	0	0	0	0	3	0	0	0	0	0	0	0	0	0	0	0	0	0	0	0	0	0	0	0	0	0	0
denovo326	Bacteria; __Proteobacteria; __Gammaproteobacteria; __Pseudomonadales; __Pseudomonadaceae; __Pseudomonas; __Pseudomonas palleroniana	Bacteria	__Proteobacteria	__Gammaproteobacteria	__Pseudomonadales	__Pseudomonadaceae	__Pseudomonas	__Pseudomonas palleroniana	1	1	NR_029050.1	NA	NA	0	0	0	0	0	0	0	0	0	0	0	0	0	0	0	0	0	0	0	0	0	0	0	0	0	0	0	0	0	0	0	0	0	0	0	0
denovo327	Bacteria; __Proteobacteria; __Gammaproteobacteria; __Pseudomonadales; __Pseudomonadaceae; __Pseudomonas; __Pseudomonas soli	Bacteria	__Proteobacteria	__Gammaproteobacteria	__Pseudomonadales	__Pseudomonadaceae	__Pseudomonas	__Pseudomonas soli	1	1	NR_134794.1	NA	NA	0	0	0	0	0	0	0	0	0	0	0	0	0	0	0	0	0	0	0	0	0	0	0	0	0	0	0	0	0	0	0	0	0	0	0	0
denovo328	; __; __; __; __; __; __		__	__	__	__	__	__	1	1	NA	NA	NA	0	0	0	0	0	0	0	0	0	0	0	0	0	0	0	0	0	0	0	0	0	0	0	0	0	0	0	0	0	0	0	0	0	0	0	0
denovo329	Bacteria; __Firmicutes; __Clostridia; __Clostridiales; __Peptostreptococcaceae; __Intestinibacter; __Intestinibacter bartlettii	Bacteria	__Firmicutes	__Clostridia	__Clostridiales	__Peptostreptococcaceae	__Intestinibacter	__Intestinibacter bartlettii	1	1	NR_027573.1	NA	NA	0	0	0	0	0	0	0	0	0	0	0	0	0	0	0	0	0	0	0	0	0	0	0	0	0	0	0	0	0	0	0	0	0	0	0	31
denovo330	Bacteria; __Actinobacteria; __Rubrobacteria; __Rubrobacterales; __Rubrobacteraceae; __Rubrobacter; __Rubrobacter spartanus	Bacteria	__Actinobacteria	__Rubrobacteria	__Rubrobacterales	__Rubrobacteraceae	__Rubrobacter	__Rubrobacter spartanus	1	1	NR_158052.1	NA	NA	0	0	0	0	0	0	0	0	0	0	0	0	0	0	0	0	0	0	0	0	0	0	0	0	0	0	0	0	0	0	0	0	0	0	0	0
denovo331	Bacteria; __Proteobacteria; __Betaproteobacteria; __Burkholderiales; __Burkholderiaceae; __Robbsia; __Robbsia andropogonis	Bacteria	__Proteobacteria	__Betaproteobacteria	__Burkholderiales	__Burkholderiaceae	__Robbsia	__Robbsia andropogonis	1	1	NR_104960.1	NA	NA	0	0	0	0	0	0	0	0	0	0	0	0	0	0	0	0	0	0	0	0	0	24	0	0	0	0	0	0	0	0	0	0	0	0	0	0
denovo332	Bacteria; __Actinobacteria; __Acidimicrobiia; __Acidimicrobiales; __Acidimicrobiaceae; __Aciditerrimonas; __Aciditerrimonas ferrireducens	Bacteria	__Actinobacteria	__Acidimicrobiia	__Acidimicrobiales	__Acidimicrobiaceae	__Aciditerrimonas	__Aciditerrimonas ferrireducens	1	1	NR_112972.1	NA	NA	0	0	0	0	0	0	0	0	0	0	0	0	0	0	0	0	0	0	0	0	0	0	0	0	0	0	0	0	0	0	0	0	0	0	0	23
denovo333	Bacteria; __Actinobacteria; __Actinobacteria; __Corynebacteriales; __Corynebacteriaceae; __Corynebacterium; __Corynebacterium jeikeium	Bacteria	__Actinobacteria	__Actinobacteria	__Corynebacteriales	__Corynebacteriaceae	__Corynebacterium	__Corynebacterium jeikeium	1	1	NR_037035.1	NA	NA	4	0	0	0	0	0	0	0	0	0	0	0	0	0	0	0	0	0	0	0	0	0	0	0	0	0	0	0	0	0	0	0	19	0	0	0
denovo334	Bacteria; __Firmicutes; __Clostridia; __Clostridiales; __Eubacteriaceae; __Acetobacterium; __Acetobacterium carbinolicum	Bacteria	__Firmicutes	__Clostridia	__Clostridiales	__Eubacteriaceae	__Acetobacterium	__Acetobacterium carbinolicum	1	1	NR_115316.1	NA	NA	0	0	0	0	0	0	0	0	0	0	0	0	0	0	0	0	0	0	0	0	0	0	0	0	0	0	0	0	0	0	0	0	0	0	0	0
denovo335	Bacteria; __Firmicutes; __Bacilli; __Bacillales; __Bacillaceae; __Bacillus; __Bacillus cohnii	Bacteria	__Firmicutes	__Bacilli	__Bacillales	__Bacillaceae	__Bacillus	__Bacillus cohnii	1	1	NR_113776.1	NA	NA	0	0	0	0	0	0	20	0	0	0	0	0	0	0	0	0	0	0	0	0	0	0	0	0	0	0	0	0	0	0	0	0	0	0	0	0
denovo336	Bacteria; __Proteobacteria; __Alphaproteobacteria; __Rhodospirillales; __Rhodospirillaceae; __Haematospirillum; __Haematospirillum jordaniae	Bacteria	__Proteobacteria	__Alphaproteobacteria	__Rhodospirillales	__Rhodospirillaceae	__Haematospirillum	__Haematospirillum jordaniae	1	1	NR_145528.1	NA	NA	0	0	0	0	0	0	0	0	0	0	0	0	0	0	0	0	0	0	0	0	0	0	0	0	0	0	0	0	0	0	0	0	0	0	0	0
denovo337	Bacteria; __Bacteroidetes; __Bacteroidia; __Bacteroidales; __Muribaculaceae; __Muribaculum; __Muribaculum intestinale	Bacteria	__Bacteroidetes	__Bacteroidia	__Bacteroidales	__Muribaculaceae	__Muribaculum	__Muribaculum intestinale	1	1	NR_144616.1	NA	NA	0	0	0	0	0	0	0	0	0	0	0	0	0	0	0	0	0	0	0	0	0	0	0	0	0	0	0	0	0	0	0	0	0	0	0	0
denovo338	Bacteria; __Proteobacteria; __Gammaproteobacteria; __Enterobacterales; __Budviciaceae; __Leminorella; __Leminorella grimontii	Bacteria	__Proteobacteria	__Gammaproteobacteria	__Enterobacterales	__Budviciaceae	__Leminorella	__Leminorella grimontii	1	1	NR_025333.1	NA	NA	0	0	0	0	0	0	0	0	0	0	0	0	0	0	0	0	0	0	0	0	0	0	0	0	0	0	0	0	0	0	0	0	0	0	0	0
denovo339	Bacteria; __Proteobacteria; __Alphaproteobacteria; __Rhodobacterales; __Rhodobacteraceae; __Haematobacter; __Haematobacter massiliensis	Bacteria	__Proteobacteria	__Alphaproteobacteria	__Rhodobacterales	__Rhodobacteraceae	__Haematobacter	__Haematobacter massiliensis	1	1	NR_115743.1	NA	NA	0	0	0	0	0	0	0	0	0	0	0	0	0	0	0	0	0	0	0	0	0	0	0	0	0	26	0	0	0	0	0	0	0	0	0	0
denovo340	Bacteria; __Firmicutes; __Bacilli; __Lactobacillales; __Carnobacteriaceae; __Desemzia; __Desemzia incerta	Bacteria	__Firmicutes	__Bacilli	__Lactobacillales	__Carnobacteriaceae	__Desemzia	__Desemzia incerta	1	1	NR_044938.1	NA	NA	0	0	0	0	0	0	0	0	0	0	0	0	0	0	0	0	0	0	0	0	0	0	0	0	0	0	0	0	0	0	0	0	0	0	0	0
denovo341	Bacteria; __Proteobacteria; __Betaproteobacteria; __Burkholderiales; __Oxalobacteraceae; __Massilia; __Massilia aurea	Bacteria	__Proteobacteria	__Betaproteobacteria	__Burkholderiales	__Oxalobacteraceae	__Massilia	__Massilia aurea	1	1	NR_042502.1	NA	NA	0	0	0	0	0	0	0	0	0	0	0	0	0	0	0	0	0	0	0	0	0	0	0	0	0	0	0	0	0	0	0	49	0	0	0	0
denovo342	Bacteria; __Proteobacteria; __Alphaproteobacteria; __Rhizobiales; __Methylobacteriaceae; __Microvirga; __Microvirga brassicacearum	Bacteria	__Proteobacteria	__Alphaproteobacteria	__Rhizobiales	__Methylobacteriaceae	__Microvirga	__Microvirga brassicacearum	1	1	NR_165776.1	NA	NA	0	0	0	0	0	0	0	0	0	0	0	0	0	0	0	0	0	0	4	0	0	0	0	0	0	0	0	0	0	0	0	0	0	0	0	14
denovo343	Bacteria; __Proteobacteria; __Gammaproteobacteria; __Enterobacterales; __Morganellaceae; __Providencia; __Providencia vermicola	Bacteria	__Proteobacteria	__Gammaproteobacteria	__Enterobacterales	__Morganellaceae	__Providencia	__Providencia vermicola	1	1	NR_042415.1	NA	NA	0	0	0	0	0	0	0	0	0	0	0	0	0	0	0	0	0	0	0	0	0	0	0	0	0	0	0	0	0	0	0	0	0	0	0	0
denovo344	Bacteria; __Firmicutes; __Bacilli; __Bacillales; __Paenibacillaceae; __Paenibacillus; __Paenibacillus psychroresistens	Bacteria	__Firmicutes	__Bacilli	__Bacillales	__Paenibacillaceae	__Paenibacillus	__Paenibacillus psychroresistens	1	1	NR_165669.1	NA	NA	0	0	24	0	0	0	0	0	0	0	0	0	0	0	0	0	0	0	0	0	0	0	0	0	0	0	0	0	0	0	0	0	0	0	0	0
denovo345	Bacteria; __Proteobacteria; __Betaproteobacteria; __Burkholderiales; __Oxalobacteraceae; __Duganella; __Duganella zoogloeoides	Bacteria	__Proteobacteria	__Betaproteobacteria	__Burkholderiales	__Oxalobacteraceae	__Duganella	__Duganella zoogloeoides	1	1	NR_114106.1	NA	NA	0	0	5	0	0	0	0	0	0	0	0	0	0	0	0	0	0	0	0	0	0	0	0	0	0	0	0	0	0	0	0	0	0	0	0	0
denovo346	Bacteria; __Proteobacteria; __Alphaproteobacteria; __Rickettsiales; __; __Lyticum; __Lyticum flagellatum	Bacteria	__Proteobacteria	__Alphaproteobacteria	__Rickettsiales	__	__Lyticum	__Lyticum flagellatum	1	1	NR_125566.1	NA	NA	0	0	0	0	0	0	0	0	51	0	0	0	0	0	0	0	0	0	0	0	0	0	0	0	0	0	0	0	0	0	0	0	0	0	0	0
denovo347	Bacteria; __Proteobacteria; __Alphaproteobacteria; __Rhodospirillales; __Rhodospirillaceae; __Caenispirillum; __Caenispirillum bisanense	Bacteria	__Proteobacteria	__Alphaproteobacteria	__Rhodospirillales	__Rhodospirillaceae	__Caenispirillum	__Caenispirillum bisanense	1	1	NR_044081.1	NA	NA	0	0	0	0	0	0	0	0	0	0	0	0	0	0	0	0	0	0	0	0	0	0	0	0	0	0	0	0	0	0	0	0	0	0	0	0
denovo348	Bacteria; __Firmicutes; __Bacilli; __Bacillales; __Bacillaceae; __Bacillus; __Bacillus loiseleuriae	Bacteria	__Firmicutes	__Bacilli	__Bacillales	__Bacillaceae	__Bacillus	__Bacillus loiseleuriae	1	1	NR_149779.1	NA	NA	11	0	0	0	0	0	0	0	0	0	0	0	0	0	0	0	0	0	0	0	0	0	0	0	0	0	0	0	0	0	0	0	0	0	0	0
denovo349	Bacteria; __Proteobacteria; __Deltaproteobacteria; __Desulfobacterales; __Desulfobulbaceae; __Desulfobulbus; __Desulfobulbus oligotrophicus	Bacteria	__Proteobacteria	__Deltaproteobacteria	__Desulfobacterales	__Desulfobulbaceae	__Desulfobulbus	__Desulfobulbus oligotrophicus	1	1	NR_156089.1	NA	NA	0	0	11	0	0	0	0	0	0	0	0	0	0	0	0	0	0	0	0	0	0	0	0	0	0	0	0	0	0	0	0	0	0	0	0	0
denovo350	Bacteria; __Proteobacteria; __Alphaproteobacteria; __Rhodospirillales; __Acetobacteraceae; __Roseomonas; __Roseomonas gilardii	Bacteria	__Proteobacteria	__Alphaproteobacteria	__Rhodospirillales	__Acetobacteraceae	__Roseomonas	__Roseomonas gilardii	1	1	NR_029061.1	NA	NA	3	0	0	0	0	0	6	0	0	0	0	0	9	1	0	0	0	0	0	0	0	0	0	0	0	0	24	0	0	0	0	0	0	0	0	0
denovo351	Bacteria; __Actinobacteria; __Actinobacteria; __Micrococcales; __Dermacoccaceae; __Calidifontibacter; __Calidifontibacter indicus	Bacteria	__Actinobacteria	__Actinobacteria	__Micrococcales	__Dermacoccaceae	__Calidifontibacter	__Calidifontibacter indicus	1	1	NR_115977.1	NA	NA	0	0	0	0	0	0	0	0	0	0	0	0	0	0	0	0	0	0	0	0	0	0	0	0	0	0	0	0	0	0	0	0	0	0	0	0
denovo352	Bacteria; __Gemmatimonadetes; __Longimicrobia; __Longimicrobiales; __Longimicrobiaceae; __Longimicrobium; __Longimicrobium terrae	Bacteria	__Gemmatimonadetes	__Longimicrobia	__Longimicrobiales	__Longimicrobiaceae	__Longimicrobium	__Longimicrobium terrae	1	1	NR_149251.1	NA	NA	0	0	0	0	0	0	0	0	0	0	0	0	0	0	0	0	0	0	0	0	0	0	0	0	0	0	0	0	0	0	0	0	0	0	0	0
denovo353	Bacteria; __Proteobacteria; __Gammaproteobacteria; __Cellvibrionales; __Microbulbiferaceae; __Microbulbifer; __Microbulbifer maritimus	Bacteria	__Proteobacteria	__Gammaproteobacteria	__Cellvibrionales	__Microbulbiferaceae	__Microbulbifer	__Microbulbifer maritimus	1	1	NR_025772.1	NA	NA	0	0	0	0	0	0	0	0	0	0	0	0	0	0	0	0	0	0	0	0	0	0	0	0	0	0	0	0	0	0	0	0	0	0	0	0
denovo354	Bacteria; __Proteobacteria; __Gammaproteobacteria; __Pseudomonadales; __Moraxellaceae; __Acinetobacter; __Acinetobacter ursingii	Bacteria	__Proteobacteria	__Gammaproteobacteria	__Pseudomonadales	__Moraxellaceae	__Acinetobacter	__Acinetobacter ursingii	1	1	NR_025392.1	NA	NA	0	0	0	0	0	0	0	0	0	0	0	0	0	0	0	0	0	0	0	0	0	0	0	0	0	0	0	0	0	0	0	0	0	0	0	0
denovo355	Bacteria; __Bacteroidetes; __Bacteroidia; __Bacteroidales; __Bacteroidaceae; __Bacteroides; __Bacteroides faecichinchillae	Bacteria	__Bacteroidetes	__Bacteroidia	__Bacteroidales	__Bacteroidaceae	__Bacteroides	__Bacteroides faecichinchillae	1	1	NR_113206.1	NA	NA	0	0	0	0	0	0	0	0	0	0	0	0	0	0	0	0	0	0	0	0	0	0	0	0	0	0	0	0	0	0	0	0	0	0	0	0
denovo356	Bacteria; __Proteobacteria; __Betaproteobacteria; __Burkholderiales; __Oxalobacteraceae; __Undibacterium; __Undibacterium squillarum	Bacteria	__Proteobacteria	__Betaproteobacteria	__Burkholderiales	__Oxalobacteraceae	__Undibacterium	__Undibacterium squillarum	1	1	NR_134224.1	NA	NA	0	0	0	0	0	0	8	0	0	0	0	0	0	0	0	0	0	0	0	0	0	0	0	0	0	17	0	0	0	0	0	0	0	0	0	0
denovo357	Bacteria; __Proteobacteria; __Gammaproteobacteria; __Enterobacterales; __Yersiniaceae; __Serratia; __Serratia liquefaciens	Bacteria	__Proteobacteria	__Gammaproteobacteria	__Enterobacterales	__Yersiniaceae	__Serratia	__Serratia liquefaciens	1	1	NR_122057.1	NA	NA	0	0	0	3	0	0	0	0	0	17	0	18	0	0	0	0	0	0	0	0	0	0	0	19	0	0	0	0	2	1	0	0	0	0	0	0
denovo358	Bacteria; __Proteobacteria; __Betaproteobacteria; __Burkholderiales; __Comamonadaceae; __Zhizhongheella; __Zhizhongheella caldifontis	Bacteria	__Proteobacteria	__Betaproteobacteria	__Burkholderiales	__Comamonadaceae	__Zhizhongheella	__Zhizhongheella caldifontis	1	1	NR_134232.1	NA	NA	0	0	0	0	0	0	8	0	0	0	0	0	0	0	0	0	0	0	0	0	0	0	0	0	0	0	0	0	0	0	0	13	0	0	0	0
denovo359	Bacteria; __Proteobacteria; __Betaproteobacteria; __Burkholderiales; __Comamonadaceae; __Curvibacter; __Curvibacter gracilis	Bacteria	__Proteobacteria	__Betaproteobacteria	__Burkholderiales	__Comamonadaceae	__Curvibacter	__Curvibacter gracilis	1	1	NR_028655.1	NA	NA	0	0	0	0	0	0	0	0	0	0	0	0	0	0	0	0	0	0	0	0	0	0	0	0	0	0	0	0	0	0	0	0	20	0	0	0
denovo360	Bacteria; __Actinobacteria; __Actinobacteria; __Corynebacteriales; __Mycobacteriaceae; __Mycobacterium; __Mycobacterium gordonae	Bacteria	__Actinobacteria	__Actinobacteria	__Corynebacteriales	__Mycobacteriaceae	__Mycobacterium	__Mycobacterium gordonae	1	1	NR_118331.1	NA	NA	0	0	11	0	0	0	0	0	0	0	0	0	0	0	0	0	0	0	0	0	0	0	0	0	0	0	0	0	0	0	0	0	0	0	0	0
denovo361	Bacteria; __Proteobacteria; __Gammaproteobacteria; __; __; __Acidibacter; __Acidibacter ferrireducens	Bacteria	__Proteobacteria	__Gammaproteobacteria	__	__	__Acidibacter	__Acidibacter ferrireducens	1	1	NR_126260.1	NA	NA	0	0	0	0	0	0	0	0	0	0	0	0	0	0	0	0	0	0	0	0	0	28	0	0	0	0	0	0	0	0	0	0	0	0	0	0
denovo362	Bacteria; __Proteobacteria; __Betaproteobacteria; __Burkholderiales; __Burkholderiaceae; __Lautropia; __Lautropia mirabilis	Bacteria	__Proteobacteria	__Betaproteobacteria	__Burkholderiales	__Burkholderiaceae	__Lautropia	__Lautropia mirabilis	1	1	NR_104897.1	NA	NA	0	0	0	0	0	0	0	0	33	0	0	0	0	0	0	0	0	0	0	0	0	0	0	0	0	0	0	0	0	0	0	0	0	0	0	0
denovo363	Bacteria; __Firmicutes; __Clostridia; __Clostridiales; __Lachnospiraceae; __Oribacterium; __Oribacterium sinus	Bacteria	__Firmicutes	__Clostridia	__Clostridiales	__Lachnospiraceae	__Oribacterium	__Oribacterium sinus	1	1	NR_029097.1	NA	NA	0	0	0	0	0	0	0	0	0	0	0	0	0	0	0	0	0	0	0	0	0	0	0	0	0	0	9	0	0	0	0	0	0	0	0	0
denovo364	Bacteria; __Firmicutes; __Negativicutes; __Veillonellales; __Veillonellaceae; __Dialister; __Dialister micraerophilus	Bacteria	__Firmicutes	__Negativicutes	__Veillonellales	__Veillonellaceae	__Dialister	__Dialister micraerophilus	1	1	NR_113356.1	NA	NA	0	0	0	0	0	0	0	16	0	0	0	0	0	0	0	0	0	0	0	0	0	0	0	0	0	0	0	0	0	0	0	0	0	0	0	0
denovo365	Bacteria; __Bacteroidetes; __Bacteroidia; __Bacteroidales; __Prevotellaceae; __Prevotella; __Prevotella colorans	Bacteria	__Bacteroidetes	__Bacteroidia	__Bacteroidales	__Prevotellaceae	__Prevotella	__Prevotella colorans	1	1	NR_151886.1	NA	NA	0	0	8	0	0	0	0	0	0	0	0	0	0	0	0	0	0	0	0	0	0	0	0	0	0	0	0	0	0	0	0	0	0	0	0	0
denovo366	Bacteria; __Bacteroidetes; __Flavobacteriia; __Flavobacteriales; __Flavobacteriaceae; __Flavobacterium; __Flavobacterium zhairuonensis	Bacteria	__Bacteroidetes	__Flavobacteriia	__Flavobacteriales	__Flavobacteriaceae	__Flavobacterium	__Flavobacterium zhairuonensis	1	1	NR_165723.1	NA	NA	0	0	0	0	0	0	0	0	6	0	0	0	0	0	0	0	0	0	0	0	0	0	0	0	0	0	0	0	0	0	0	0	0	0	0	0
denovo367	Bacteria; __Actinobacteria; __Actinobacteria; __Propionibacteriales; __Nocardioidaceae; __Nocardioides; __Nocardioides halotolerans	Bacteria	__Actinobacteria	__Actinobacteria	__Propionibacteriales	__Nocardioidaceae	__Nocardioides	__Nocardioides halotolerans	1	1	NR_044234.1	NA	NA	0	0	0	0	0	0	0	0	0	0	0	0	0	0	0	0	0	0	0	0	0	0	0	0	0	0	0	0	0	0	0	0	0	0	0	0
denovo368	Bacteria; __Bacteroidetes; __Bacteroidia; __Bacteroidales; __Prevotellaceae; __Prevotella; __Prevotella corporis	Bacteria	__Bacteroidetes	__Bacteroidia	__Bacteroidales	__Prevotellaceae	__Prevotella	__Prevotella corporis	1	1	NR_113099.1	NA	NA	0	0	0	0	0	0	0	0	0	0	0	0	0	0	0	0	0	0	0	0	0	0	0	0	0	0	0	0	0	0	0	0	0	0	0	0
denovo369	Bacteria; __Bacteroidetes; __Bacteroidia; __Bacteroidales; __Porphyromonadaceae; __Microbacter; __Microbacter margulisiae	Bacteria	__Bacteroidetes	__Bacteroidia	__Bacteroidales	__Porphyromonadaceae	__Microbacter	__Microbacter margulisiae	1	1	NR_126211.2	NA	NA	0	0	0	0	0	0	26	0	0	0	0	0	0	0	0	0	0	0	0	0	0	0	0	0	0	0	0	0	0	0	0	0	0	0	0	0
denovo370	Bacteria; __Actinobacteria; __Actinobacteria; __Actinomycetales; __Actinomycetaceae; __Actinomyces; __Actinomyces polynesiensis	Bacteria	__Actinobacteria	__Actinobacteria	__Actinomycetales	__Actinomycetaceae	__Actinomyces	__Actinomyces polynesiensis	1	1	NR_144691.1	NA	NA	0	0	0	0	0	0	0	0	0	0	0	0	0	0	0	0	0	0	0	0	0	24	0	0	0	0	0	0	0	0	0	0	0	0	0	0
denovo371	Bacteria; __Bacteroidetes; __Sphingobacteriia; __Sphingobacteriales; __Sphingobacteriaceae; __Arcticibacter; __Arcticibacter pallidicorallinus	Bacteria	__Bacteroidetes	__Sphingobacteriia	__Sphingobacteriales	__Sphingobacteriaceae	__Arcticibacter	__Arcticibacter pallidicorallinus	1	1	NR_133966.1	NA	NA	0	0	0	0	0	0	0	0	0	0	0	0	0	0	0	0	0	0	0	0	0	0	0	0	0	0	0	0	0	0	0	0	0	0	0	0
denovo372	Bacteria; __Firmicutes; __Bacilli; __Lactobacillales; __Lactobacillaceae; __Lactobacillus; __Lactobacillus silagincola	Bacteria	__Firmicutes	__Bacilli	__Lactobacillales	__Lactobacillaceae	__Lactobacillus	__Lactobacillus silagincola	1	1	NR_158059.1	NA	NA	0	33	0	0	0	0	0	0	0	0	0	0	0	0	0	0	0	0	0	0	0	0	0	0	0	0	0	0	0	0	0	0	0	0	0	0
denovo373	Bacteria; __Firmicutes; __Bacilli; __Lactobacillales; __Aerococcaceae; __Eremococcus; __Eremococcus coleocola	Bacteria	__Firmicutes	__Bacilli	__Lactobacillales	__Aerococcaceae	__Eremococcus	__Eremococcus coleocola	1	1	NR_026481.1	NA	NA	0	0	0	0	0	0	0	0	0	0	0	0	0	0	0	0	0	0	0	0	0	0	0	0	0	0	0	0	0	0	0	0	10	0	0	0
denovo374	Bacteria; __Proteobacteria; __Alphaproteobacteria; __Rhizobiales; __Hyphomicrobiaceae; __Devosia; __Devosia insulae	Bacteria	__Proteobacteria	__Alphaproteobacteria	__Rhizobiales	__Hyphomicrobiaceae	__Devosia	__Devosia insulae	1	1	NR_044036.1	NA	NA	0	0	0	0	0	0	0	0	0	0	0	0	0	0	0	0	0	0	0	0	0	0	0	0	0	0	0	0	0	0	0	0	0	0	0	0
denovo375	Bacteria; __Firmicutes; __Tissierellia; __Tissierellales; __Peptoniphilaceae; __Gallicola; __Gallicola barnesae	Bacteria	__Firmicutes	__Tissierellia	__Tissierellales	__Peptoniphilaceae	__Gallicola	__Gallicola barnesae	1	1	NR_040843.1	NA	NA	0	0	0	0	0	0	0	0	0	0	0	0	0	0	0	0	0	0	0	0	0	0	0	0	0	0	0	0	0	0	0	0	0	0	0	0
denovo376	Bacteria; __Acidobacteria; __Acidobacteriia; __Bryobacterales; __Bryobacteraceae; __Paludibaculum; __Paludibaculum fermentans	Bacteria	__Acidobacteria	__Acidobacteriia	__Bryobacterales	__Bryobacteraceae	__Paludibaculum	__Paludibaculum fermentans	1	1	NR_134120.1	NA	NA	0	10	0	0	0	0	0	0	0	0	0	0	0	0	0	0	0	0	0	0	0	0	0	0	0	0	0	0	0	0	0	0	0	0	0	0
denovo377	Bacteria; __Proteobacteria; __Gammaproteobacteria; __Xanthomonadales; __Xanthomonadaceae; __Stenotrophomonas; __Stenotrophomonas pavanii	Bacteria	__Proteobacteria	__Gammaproteobacteria	__Xanthomonadales	__Xanthomonadaceae	__Stenotrophomonas	__Stenotrophomonas pavanii	1	1	NR_116793.1	NA	NA	0	0	0	0	0	0	0	0	0	0	0	0	0	0	0	9	0	9	0	0	0	0	0	0	0	0	0	0	0	0	0	0	0	0	0	0
denovo378	; __; __; __; __; __; __		__	__	__	__	__	__	1	1	NA	NA	NA	0	0	11	0	0	0	0	0	0	0	0	0	0	0	0	0	0	0	0	0	0	0	0	0	0	0	0	0	0	0	0	0	0	0	0	0
denovo379	Bacteria; __Proteobacteria; __Betaproteobacteria; __Burkholderiales; __Comamonadaceae; __Variovorax; __Variovorax boronicumulans	Bacteria	__Proteobacteria	__Betaproteobacteria	__Burkholderiales	__Comamonadaceae	__Variovorax	__Variovorax boronicumulans	1	1	NR_114214.1	NA	NA	0	0	0	0	0	0	0	0	0	0	0	0	0	0	0	0	0	0	3	0	0	0	0	0	10	0	0	0	0	0	0	0	0	0	0	0
denovo380	Bacteria; __Proteobacteria; __Alphaproteobacteria; __Rhizobiales; __Xanthobacteraceae; __Pseudoxanthobacter; __Pseudoxanthobacter soli	Bacteria	__Proteobacteria	__Alphaproteobacteria	__Rhizobiales	__Xanthobacteraceae	__Pseudoxanthobacter	__Pseudoxanthobacter soli	1	1	NR_044225.1	NA	NA	0	0	0	0	0	0	0	0	0	0	0	0	0	0	0	0	0	0	0	0	0	0	0	0	0	0	0	0	0	0	0	0	0	0	0	0
denovo381	Bacteria; __Actinobacteria; __Actinobacteria; __Micrococcales; __Bogoriellaceae; __Georgenia; __Georgenia deserti	Bacteria	__Actinobacteria	__Actinobacteria	__Micrococcales	__Bogoriellaceae	__Georgenia	__Georgenia deserti	1	1	NR_163612.1	NA	NA	0	0	0	0	0	0	1	0	0	0	0	0	0	0	0	0	0	0	0	0	0	0	0	0	0	0	0	0	0	0	0	0	0	0	0	0
denovo382	Bacteria; __Proteobacteria; __Betaproteobacteria; __Neisseriales; __Neisseriaceae; __Snodgrassella; __Snodgrassella alvi	Bacteria	__Proteobacteria	__Betaproteobacteria	__Neisseriales	__Neisseriaceae	__Snodgrassella	__Snodgrassella alvi	1	1	NR_121735.2	NA	NA	0	0	0	0	0	0	0	0	0	0	0	0	0	0	0	0	0	0	0	0	0	0	0	0	0	0	0	0	0	0	0	0	0	3	0	0
denovo383	Bacteria; __Proteobacteria; __Betaproteobacteria; __Burkholderiales; __Burkholderiaceae; __Ralstonia; __Ralstonia insidiosa	Bacteria	__Proteobacteria	__Betaproteobacteria	__Burkholderiales	__Burkholderiaceae	__Ralstonia	__Ralstonia insidiosa	1	1	NR_025242.1	NA	NA	0	15	0	0	0	0	0	0	0	0	0	0	0	0	0	0	0	0	0	0	0	0	0	0	0	0	0	0	0	0	0	0	0	0	0	0
denovo384	Bacteria; __Actinobacteria; __Actinobacteria; __Propionibacteriales; __Nocardioidaceae; __Nocardioides; __Nocardioides solisilvae	Bacteria	__Actinobacteria	__Actinobacteria	__Propionibacteriales	__Nocardioidaceae	__Nocardioides	__Nocardioides solisilvae	1	1	NR_136850.1	NA	NA	0	0	0	0	0	0	0	0	0	0	0	0	0	0	0	0	0	0	0	0	0	0	0	0	0	0	0	0	0	0	0	0	0	0	0	0
denovo385	Bacteria; __Proteobacteria; __Alphaproteobacteria; __Rhizobiales; __; __Hartmannibacter; __Hartmannibacter diazotrophicus	Bacteria	__Proteobacteria	__Alphaproteobacteria	__Rhizobiales	__	__Hartmannibacter	__Hartmannibacter diazotrophicus	1	1	NR_134057.1	NA	NA	0	0	0	0	0	0	0	0	18	0	0	0	0	0	0	0	0	0	0	0	0	0	0	0	0	0	0	0	0	0	0	0	0	0	0	0
denovo386	Bacteria; __Firmicutes; __Bacilli; __Lactobacillales; __Streptococcaceae; __Streptococcus; __Streptococcus sinensis	Bacteria	__Firmicutes	__Bacilli	__Lactobacillales	__Streptococcaceae	__Streptococcus	__Streptococcus sinensis	1	1	NR_028833.1	NA	NA	0	0	0	0	0	0	0	0	0	0	0	0	0	0	0	0	0	0	0	0	0	0	0	0	0	0	0	0	0	0	0	0	0	0	0	0
denovo387	Bacteria; __Proteobacteria; __Alphaproteobacteria; __Sphingomonadales; __Sphingomonadaceae; __Sphingomonas; __Sphingomonas palustris	Bacteria	__Proteobacteria	__Alphaproteobacteria	__Sphingomonadales	__Sphingomonadaceae	__Sphingomonas	__Sphingomonas palustris	1	1	NR_157774.1	NA	NA	0	0	13	0	0	0	0	0	0	0	0	0	0	0	0	0	0	0	0	0	0	0	0	0	0	0	0	0	0	0	0	0	0	3	0	0
denovo388	Bacteria; __Firmicutes; __Bacilli; __Bacillales; __Bacillaceae; __Bacillus; __Bacillus wiedmannii	Bacteria	__Firmicutes	__Bacilli	__Bacillales	__Bacillaceae	__Bacillus	__Bacillus wiedmannii	1	1	NR_152692.1	NA	NA	0	0	0	0	0	0	0	0	0	0	0	0	0	0	0	0	0	0	0	0	0	0	0	0	0	0	0	0	0	0	0	0	3	0	0	0
denovo389	Bacteria; __Firmicutes; __Negativicutes; __Selenomonadales; __Selenomonadaceae; __Megamonas; __Megamonas funiformis	Bacteria	__Firmicutes	__Negativicutes	__Selenomonadales	__Selenomonadaceae	__Megamonas	__Megamonas funiformis	1	1	NR_041590.1	NA	NA	0	0	0	0	0	0	0	0	0	0	0	0	0	0	0	0	0	0	0	0	0	0	0	0	0	0	0	0	0	0	0	0	0	0	0	0
denovo390	Bacteria; __Firmicutes; __Clostridia; __Clostridiales; __Lachnospiraceae; __Anaerostipes; __Anaerostipes hadrus	Bacteria	__Firmicutes	__Clostridia	__Clostridiales	__Lachnospiraceae	__Anaerostipes	__Anaerostipes hadrus	1	1	NR_117139.2	NA	NA	0	0	0	0	0	0	0	0	0	0	0	0	0	0	0	0	0	0	0	0	0	8	0	0	0	0	0	0	0	0	0	0	0	0	0	0
denovo391	Bacteria; __Actinobacteria; __Actinobacteria; __Propionibacteriales; __Nocardioidaceae; __Nocardioides; __Nocardioides caricicola	Bacteria	__Actinobacteria	__Actinobacteria	__Propionibacteriales	__Nocardioidaceae	__Nocardioides	__Nocardioides caricicola	1	1	NR_116795.1	NA	NA	0	0	0	0	0	0	0	0	10	0	0	0	0	0	0	0	0	0	0	0	0	0	0	0	0	0	0	0	0	0	0	0	0	0	0	0
denovo392	Bacteria; __Chloroflexi; __Thermomicrobia; __Sphaerobacterales; __Sphaerobacteraceae; __Sphaerobacter; __Sphaerobacter thermophilus	Bacteria	__Chloroflexi	__Thermomicrobia	__Sphaerobacterales	__Sphaerobacteraceae	__Sphaerobacter	__Sphaerobacter thermophilus	1	1	NR_074379.1	NA	NA	0	0	0	0	0	0	0	0	0	0	0	0	0	0	0	0	0	0	0	0	0	0	0	0	0	0	0	0	0	0	0	0	0	0	0	0
denovo393	Bacteria; __Bacteroidetes; __Chitinophagia; __Chitinophagales; __Chitinophagaceae; __Ilyomonas; __Ilyomonas limi	Bacteria	__Bacteroidetes	__Chitinophagia	__Chitinophagales	__Chitinophagaceae	__Ilyomonas	__Ilyomonas limi	1	1	NR_164990.1	NA	NA	0	0	0	0	0	0	0	0	0	0	0	0	0	0	0	0	0	0	0	0	0	0	0	0	0	0	0	0	0	0	0	0	0	0	0	0
denovo394	Bacteria; __Bacteroidetes; __Flavobacteriia; __Flavobacteriales; __Flavobacteriaceae; __Chryseobacterium; __Chryseobacterium zhengzhouense	Bacteria	__Bacteroidetes	__Flavobacteriia	__Flavobacteriales	__Flavobacteriaceae	__Chryseobacterium	__Chryseobacterium zhengzhouense	1	1	NR_164868.1	NA	NA	0	0	0	0	0	0	0	0	0	0	0	0	0	0	0	0	0	0	0	0	0	0	0	0	0	0	0	0	0	0	0	0	0	0	0	0
denovo395	Bacteria; __Proteobacteria; __Gammaproteobacteria; __Legionellales; __Legionellaceae; __Legionella; __Legionella cardiaca	Bacteria	__Proteobacteria	__Gammaproteobacteria	__Legionellales	__Legionellaceae	__Legionella	__Legionella cardiaca	1	1	NR_109426.1	NA	NA	0	0	0	0	0	0	0	0	0	0	0	0	0	0	0	0	0	0	0	0	0	0	0	0	0	0	0	0	0	0	7	0	0	0	0	0
denovo396	Bacteria; __Bacteroidetes; __Flavobacteriia; __Flavobacteriales; __Flavobacteriaceae; __Chryseobacterium; __Chryseobacterium jeonii	Bacteria	__Bacteroidetes	__Flavobacteriia	__Flavobacteriales	__Flavobacteriaceae	__Chryseobacterium	__Chryseobacterium jeonii	1	1	NR_025810.1	NA	NA	0	0	0	0	0	0	9	0	0	0	0	0	0	0	0	0	0	0	0	0	0	0	0	0	0	0	0	0	0	0	3	0	0	0	0	0
denovo397	Bacteria; __Proteobacteria; __Gammaproteobacteria; __Pseudomonadales; __Moraxellaceae; __Psychrobacter; __Psychrobacter aquimaris	Bacteria	__Proteobacteria	__Gammaproteobacteria	__Pseudomonadales	__Moraxellaceae	__Psychrobacter	__Psychrobacter aquimaris	1	1	NR_043140.1	NA	NA	3	0	0	0	0	0	0	0	0	0	0	0	0	0	0	0	0	0	0	0	0	0	0	0	0	0	2	0	0	0	0	0	0	0	0	0
denovo398	Bacteria; __Deinococcus-Thermus; __Deinococci; __Deinococcales; __Deinococcaceae; __Deinococcus; __Deinococcus aetherius	Bacteria	__Deinococcus-Thermus	__Deinococci	__Deinococcales	__Deinococcaceae	__Deinococcus	__Deinococcus aetherius	1	1	NR_112189.1	NA	NA	0	0	7	0	0	0	0	0	0	0	0	0	0	0	0	0	0	0	0	0	0	0	0	0	0	0	0	0	0	0	0	0	0	0	0	0
denovo399	Bacteria; __Firmicutes; __Tissierellia; __; __; __Ezakiella; __Ezakiella massiliensis	Bacteria	__Firmicutes	__Tissierellia	__	__	__Ezakiella	__Ezakiella massiliensis	1	1	NR_159077.1	NA	NA	0	0	0	0	0	0	0	0	0	0	0	0	0	0	0	0	0	0	0	0	0	0	0	0	0	0	10	0	0	0	0	0	0	0	0	0
denovo400	Bacteria; __Proteobacteria; __Alphaproteobacteria; __Rhizobiales; __Hyphomicrobiaceae; __Aquabacter; __Aquabacter spiritensis	Bacteria	__Proteobacteria	__Alphaproteobacteria	__Rhizobiales	__Hyphomicrobiaceae	__Aquabacter	__Aquabacter spiritensis	1	1	NR_104747.1	NA	NA	0	0	0	0	0	0	0	0	0	0	0	0	0	0	0	0	0	0	0	0	0	0	0	0	0	0	0	0	0	0	0	0	0	0	0	0
denovo401	Bacteria; __Proteobacteria; __Betaproteobacteria; __Nitrosomonadales; __Sterolibacteriaceae; __Methyloversatilis; __Methyloversatilis discipulorum	Bacteria	__Proteobacteria	__Betaproteobacteria	__Nitrosomonadales	__Sterolibacteriaceae	__Methyloversatilis	__Methyloversatilis discipulorum	1	1	NR_136517.2	NA	NA	0	0	0	0	0	0	0	0	0	0	0	0	0	0	0	0	0	0	0	0	0	0	0	0	0	0	0	0	0	0	4	0	0	0	0	0
denovo402	Bacteria; __Actinobacteria; __Actinobacteria; __Pseudonocardiales; __Pseudonocardiaceae; __Saccharothrix; __Saccharothrix ghardaiensis	Bacteria	__Actinobacteria	__Actinobacteria	__Pseudonocardiales	__Pseudonocardiaceae	__Saccharothrix	__Saccharothrix ghardaiensis	1	1	NR_149193.1	NA	NA	0	0	0	0	0	0	0	0	0	0	0	0	0	0	0	0	0	0	0	0	0	0	0	0	0	0	9	0	0	0	0	0	0	0	0	0
denovo403	Bacteria; __Actinobacteria; __Actinobacteria; __Kineosporiales; __Kineosporiaceae; __Kineosporia; __Kineosporia rhizophila	Bacteria	__Actinobacteria	__Actinobacteria	__Kineosporiales	__Kineosporiaceae	__Kineosporia	__Kineosporia rhizophila	1	1	NR_117176.1	NA	NA	0	0	0	0	0	0	0	0	0	0	0	0	0	0	0	0	0	0	0	0	0	0	0	0	0	0	0	0	0	0	0	0	0	0	0	0
denovo404	Bacteria; __Firmicutes; __Bacilli; __Bacillales; __Paenibacillaceae; __Gorillibacterium; __Gorillibacterium massiliense	Bacteria	__Firmicutes	__Bacilli	__Bacillales	__Paenibacillaceae	__Gorillibacterium	__Gorillibacterium massiliense	1	1	NR_146838.1	NA	NA	0	0	0	0	0	0	0	0	0	0	0	0	0	0	0	0	0	0	0	0	0	0	0	0	0	0	0	0	0	0	0	0	0	0	0	0
denovo405	Bacteria; __Cyanobacteria; __; __Chroococcidiopsidales; __Chroococcidiopsidaceae; __Aliterella; __Aliterella antarctica	Bacteria	__Cyanobacteria	__	__Chroococcidiopsidales	__Chroococcidiopsidaceae	__Aliterella	__Aliterella antarctica	1	1	NR_151904.1	NA	NA	0	0	0	0	0	0	0	0	0	0	0	0	0	0	0	0	0	0	0	0	0	0	0	0	0	0	12	0	0	0	0	0	0	0	0	0
denovo406	Bacteria; __Proteobacteria; __Gammaproteobacteria; __Aeromonadales; __Aeromonadaceae; __Aeromonas; __Aeromonas sanarellii	Bacteria	__Proteobacteria	__Gammaproteobacteria	__Aeromonadales	__Aeromonadaceae	__Aeromonas	__Aeromonas sanarellii	1	1	NR_116584.1	NA	NA	0	0	0	0	0	0	0	0	0	0	0	0	0	0	0	0	0	0	0	0	0	0	0	0	0	0	0	0	0	0	0	0	0	0	0	0
denovo407	Bacteria; __Actinobacteria; __Actinobacteria; __Corynebacteriales; __Corynebacteriaceae; __Corynebacterium; __Corynebacterium crudilactis	Bacteria	__Actinobacteria	__Actinobacteria	__Corynebacteriales	__Corynebacteriaceae	__Corynebacterium	__Corynebacterium crudilactis	1	1	NR_153680.1	NA	NA	0	0	0	0	0	0	0	0	0	0	0	0	0	0	0	0	0	0	0	0	0	0	0	0	0	0	0	0	0	0	0	0	0	0	0	0
denovo408	Bacteria; __Proteobacteria; __Betaproteobacteria; __Neisseriales; __Chromobacteriaceae; __Vogesella; __Vogesella mureinivorans	Bacteria	__Proteobacteria	__Betaproteobacteria	__Neisseriales	__Chromobacteriaceae	__Vogesella	__Vogesella mureinivorans	1	1	NR_104556.1	NA	NA	0	0	0	0	0	0	0	0	0	0	0	0	0	0	0	0	0	0	0	0	0	0	0	0	0	0	0	0	0	0	0	0	0	0	0	0
denovo409	Bacteria; __Actinobacteria; __Actinobacteria; __Streptomycetales; __Streptomycetaceae; __Streptacidiphilus; __Streptacidiphilus anmyonensis	Bacteria	__Actinobacteria	__Actinobacteria	__Streptomycetales	__Streptomycetaceae	__Streptacidiphilus	__Streptacidiphilus anmyonensis	1	1	NR_044011.1	NA	NA	0	0	0	0	0	0	0	0	7	0	0	0	0	0	0	0	0	0	0	0	0	0	0	0	0	0	0	0	0	0	0	0	0	0	0	0
denovo410	Bacteria; __Proteobacteria; __Gammaproteobacteria; __Pseudomonadales; __Moraxellaceae; __Acinetobacter; __Acinetobacter baumannii	Bacteria	__Proteobacteria	__Gammaproteobacteria	__Pseudomonadales	__Moraxellaceae	__Acinetobacter	__Acinetobacter baumannii	1	1	NR_117677.1	NA	NA	0	15	0	0	0	0	0	0	0	0	0	0	0	0	0	0	0	0	0	0	0	0	0	0	0	0	0	0	0	0	0	0	0	0	0	0
denovo411	Bacteria; __Actinobacteria; __Actinobacteria; __Micrococcales; __Dermacoccaceae; __Kytococcus; __Kytococcus sedentarius	Bacteria	__Actinobacteria	__Actinobacteria	__Micrococcales	__Dermacoccaceae	__Kytococcus	__Kytococcus sedentarius	1	1	NR_074714.2	NA	NA	0	0	0	0	0	0	0	0	0	0	0	0	0	0	0	0	0	0	0	0	0	0	0	0	0	0	0	0	0	0	0	0	0	0	0	0
denovo412	Bacteria; __Proteobacteria; __Alphaproteobacteria; __Rhodospirillales; __Rhodospirillaceae; __Lacibacterium; __Lacibacterium aquatile	Bacteria	__Proteobacteria	__Alphaproteobacteria	__Rhodospirillales	__Rhodospirillaceae	__Lacibacterium	__Lacibacterium aquatile	1	1	NR_125556.1	NA	NA	17	0	0	0	0	0	0	0	0	0	0	0	0	0	0	0	0	0	0	0	0	0	0	0	0	0	0	0	0	0	0	0	0	0	0	0
denovo413	Bacteria; __Planctomycetes; __Planctomycetia; __Isosphaerales; __Isosphaeraceae; __Singulisphaera; __Singulisphaera acidiphila	Bacteria	__Planctomycetes	__Planctomycetia	__Isosphaerales	__Isosphaeraceae	__Singulisphaera	__Singulisphaera acidiphila	1	1	NR_102439.1	NA	NA	0	0	0	0	0	0	0	0	0	0	0	0	0	0	0	0	0	0	0	0	0	0	0	0	0	0	10	0	0	0	0	0	0	0	0	0
denovo414	Bacteria; __Actinobacteria; __Actinobacteria; __Kineosporiales; __Kineosporiaceae; __Kineococcus; __Kineococcus xinjiangensis	Bacteria	__Actinobacteria	__Actinobacteria	__Kineosporiales	__Kineosporiaceae	__Kineococcus	__Kineococcus xinjiangensis	1	1	NR_044522.1	NA	NA	0	0	0	0	0	0	0	0	0	0	0	0	0	0	0	0	0	0	0	0	0	0	0	0	0	0	0	0	0	0	0	0	0	0	0	0
denovo415	; __; __; __; __; __; __		__	__	__	__	__	__	1	1	NA	NA	NA	0	0	0	0	0	0	0	0	0	0	0	0	0	0	7	0	0	0	0	0	0	0	0	0	0	0	0	0	0	0	0	0	0	0	0	0
denovo416	Bacteria; __Proteobacteria; __Alphaproteobacteria; __Caulobacterales; __Caulobacteraceae; __Asticcacaulis; __Asticcacaulis excentricus	Bacteria	__Proteobacteria	__Alphaproteobacteria	__Caulobacterales	__Caulobacteraceae	__Asticcacaulis	__Asticcacaulis excentricus	1	1	NR_074137.1	NA	NA	0	0	0	0	0	0	0	0	0	0	0	0	0	0	0	0	0	0	0	0	0	0	0	0	0	0	0	0	0	0	0	0	0	0	0	0
denovo417	Bacteria; __Firmicutes; __Tissierellia; __Tissierellales; __Peptoniphilaceae; __Parvimonas; __Parvimonas micra	Bacteria	__Firmicutes	__Tissierellia	__Tissierellales	__Peptoniphilaceae	__Parvimonas	__Parvimonas micra	1	1	NR_114338.1	NA	NA	0	7	0	0	0	0	0	0	0	0	0	0	0	0	0	0	0	0	0	0	0	0	0	0	0	0	0	0	0	0	0	0	0	0	0	0
denovo418	Bacteria; __Proteobacteria; __Betaproteobacteria; __Burkholderiales; __Comamonadaceae; __Schlegelella; __Schlegelella aquatica	Bacteria	__Proteobacteria	__Betaproteobacteria	__Burkholderiales	__Comamonadaceae	__Schlegelella	__Schlegelella aquatica	1	1	NR_043802.1	NA	NA	0	0	0	0	0	0	0	0	0	0	0	0	0	0	0	0	0	0	0	0	0	0	0	0	0	0	0	0	0	0	0	0	0	0	0	0
denovo419	Bacteria; __Proteobacteria; __Gammaproteobacteria; __Enterobacterales; __Yersiniaceae; __Serratia; __Serratia oryzae	Bacteria	__Proteobacteria	__Gammaproteobacteria	__Enterobacterales	__Yersiniaceae	__Serratia	__Serratia oryzae	1	1	NR_157762.1	NA	NA	0	0	0	1	0	0	0	0	0	0	1	0	0	0	0	1	3	0	0	0	0	0	0	0	0	0	0	0	0	0	0	0	0	0	0	0
denovo420	Bacteria; __Proteobacteria; __Gammaproteobacteria; __Enterobacterales; __Hafniaceae; __Hafnia; __Hafnia psychrotolerans	Bacteria	__Proteobacteria	__Gammaproteobacteria	__Enterobacterales	__Hafniaceae	__Hafnia	__Hafnia psychrotolerans	1	1	NR_134741.1	NA	NA	0	0	0	4	0	0	0	0	0	0	1	0	0	0	0	1	0	0	0	0	0	0	0	0	0	0	0	0	0	0	0	0	0	0	0	0
denovo421	Bacteria; __Bacteroidetes; __Bacteroidia; __Bacteroidales; __Prevotellaceae; __Prevotella; __Prevotella nigrescens	Bacteria	__Bacteroidetes	__Bacteroidia	__Bacteroidales	__Prevotellaceae	__Prevotella	__Prevotella nigrescens	1	1	NR_113116.1	NA	NA	0	0	10	0	0	0	0	0	0	0	0	0	0	0	0	0	0	0	0	0	0	0	0	0	0	0	0	0	0	0	0	0	0	0	0	0
denovo422	Bacteria; __Proteobacteria; __Alphaproteobacteria; __Rhizobiales; __Brucellaceae; __Brucella; __Brucella ovis	Bacteria	__Proteobacteria	__Alphaproteobacteria	__Rhizobiales	__Brucellaceae	__Brucella	__Brucella ovis	1	1	NR_036772.1	NA	NA	0	0	0	0	0	0	0	0	0	1	0	0	0	0	0	0	0	0	0	0	0	0	0	8	0	0	0	0	0	0	0	0	0	0	0	0
denovo423	Bacteria; __Proteobacteria; __Alphaproteobacteria; __Rhizobiales; __; __Methyloceanibacter; __Methyloceanibacter caenitepidi	Bacteria	__Proteobacteria	__Alphaproteobacteria	__Rhizobiales	__	__Methyloceanibacter	__Methyloceanibacter caenitepidi	1	1	NR_125465.1	NA	NA	0	0	0	0	0	0	0	0	0	0	0	0	0	0	0	0	0	0	0	0	0	0	0	0	0	0	0	0	0	0	0	0	0	0	0	0
denovo424	Bacteria; __Proteobacteria; __Betaproteobacteria; __Neisseriales; __Neisseriaceae; __Kingella; __Kingella oralis	Bacteria	__Proteobacteria	__Betaproteobacteria	__Neisseriales	__Neisseriaceae	__Kingella	__Kingella oralis	1	1	NR_025891.1	NA	NA	0	0	0	0	0	0	7	0	0	0	0	0	0	0	0	0	0	0	0	0	0	0	0	0	0	0	0	0	0	0	0	0	0	0	0	0
denovo425	Bacteria; __Bacteroidetes; __Flavobacteriia; __Flavobacteriales; __Flavobacteriaceae; __Elizabethkingia; __Elizabethkingia anophelis	Bacteria	__Bacteroidetes	__Flavobacteriia	__Flavobacteriales	__Flavobacteriaceae	__Elizabethkingia	__Elizabethkingia anophelis	1	1	NR_136481.1	NA	NA	0	0	0	0	0	0	0	0	0	0	0	0	0	0	0	0	0	0	0	0	0	0	0	0	0	0	0	0	0	0	0	0	0	0	0	0
denovo426	Bacteria; __Firmicutes; __Tissierellia; __Tissierellales; __Peptoniphilaceae; __Peptoniphilus; __Peptoniphilus coxii	Bacteria	__Firmicutes	__Tissierellia	__Tissierellales	__Peptoniphilaceae	__Peptoniphilus	__Peptoniphilus coxii	1	1	NR_117556.1	NA	NA	0	0	0	0	0	0	0	0	0	0	0	0	0	0	0	0	0	0	0	0	0	0	0	0	0	0	0	0	0	0	0	0	0	0	0	0
denovo427	Bacteria; __Proteobacteria; __Gammaproteobacteria; __Legionellales; __Legionellaceae; __Legionella; __Legionella nautarum	Bacteria	__Proteobacteria	__Gammaproteobacteria	__Legionellales	__Legionellaceae	__Legionella	__Legionella nautarum	1	1	NR_044961.1	NA	NA	0	0	0	0	0	0	0	0	0	0	0	0	0	0	0	0	0	0	0	0	0	0	0	0	0	0	0	0	0	0	0	0	0	0	0	0
denovo428	Bacteria; __Bacteroidetes; __Flavobacteriia; __Flavobacteriales; __Flavobacteriaceae; __Chryseobacterium; __Chryseobacterium anthropi	Bacteria	__Bacteroidetes	__Flavobacteriia	__Flavobacteriales	__Flavobacteriaceae	__Chryseobacterium	__Chryseobacterium anthropi	1	1	NR_115099.1	NA	NA	0	0	0	0	0	0	0	0	23	0	0	0	0	0	0	0	0	0	0	0	0	0	0	0	0	0	0	0	0	0	0	0	0	0	0	0
denovo429	Bacteria; __Synergistetes; __Synergistia; __Synergistales; __Synergistaceae; __Fretibacterium; __Fretibacterium fastidiosum	Bacteria	__Synergistetes	__Synergistia	__Synergistales	__Synergistaceae	__Fretibacterium	__Fretibacterium fastidiosum	1	1	NR_108538.1	NA	NA	0	0	9	0	0	0	0	0	0	0	0	0	0	0	0	0	0	0	0	0	0	0	0	0	0	0	0	0	0	0	0	0	0	0	0	0
denovo430	; __; __; __; __; __; __		__	__	__	__	__	__	1	1	NA	NA	NA	0	0	0	0	0	0	0	0	0	0	0	0	0	0	0	0	0	0	0	0	0	0	0	0	0	0	0	0	0	0	0	0	0	6	0	0
denovo431	Bacteria; __Gemmatimonadetes; __Gemmatimonadetes; __Gemmatimonadales; __Gemmatimonadaceae; __Gemmatimonas; __Gemmatimonas aurantiaca	Bacteria	__Gemmatimonadetes	__Gemmatimonadetes	__Gemmatimonadales	__Gemmatimonadaceae	__Gemmatimonas	__Gemmatimonas aurantiaca	1	1	NR_074708.2	NA	NA	0	0	0	0	0	0	6	0	0	0	0	0	0	0	0	0	0	0	0	0	0	0	0	0	0	0	0	0	0	0	0	0	0	0	0	0
denovo432	Bacteria; __Actinobacteria; __Actinobacteria; __Actinomycetales; __Actinomycetaceae; __Actinomyces; __Actinomyces israelii	Bacteria	__Actinobacteria	__Actinobacteria	__Actinomycetales	__Actinomycetaceae	__Actinomyces	__Actinomyces israelii	1	1	NR_114401.1	NA	NA	0	0	0	0	0	0	0	0	0	0	0	0	0	0	0	0	0	0	0	0	0	0	0	0	0	0	0	0	0	0	0	0	0	0	0	0
denovo433	Bacteria; __Proteobacteria; __Betaproteobacteria; __Burkholderiales; __Comamonadaceae; __Rhodoferax; __Rhodoferax antarcticus	Bacteria	__Proteobacteria	__Betaproteobacteria	__Burkholderiales	__Comamonadaceae	__Rhodoferax	__Rhodoferax antarcticus	1	1	NR_104835.1	NA	NA	0	0	0	0	0	0	0	0	0	0	0	1	0	0	0	0	0	0	0	0	0	0	0	2	0	0	0	0	0	0	0	0	0	0	0	0
denovo434	Bacteria; __Bacteroidetes; __Sphingobacteriia; __Sphingobacteriales; __Sphingobacteriaceae; __Pedobacter; __Pedobacter solisilvae	Bacteria	__Bacteroidetes	__Sphingobacteriia	__Sphingobacteriales	__Sphingobacteriaceae	__Pedobacter	__Pedobacter solisilvae	1	1	NR_159137.1	NA	NA	0	0	0	0	0	0	0	0	0	0	0	0	0	0	0	0	0	0	0	0	0	0	0	0	0	0	0	0	0	0	0	0	0	0	0	0
denovo435	Bacteria; __Bacteroidetes; __Chitinophagia; __Chitinophagales; __Chitinophagaceae; __Rurimicrobium; __Rurimicrobium arvi	Bacteria	__Bacteroidetes	__Chitinophagia	__Chitinophagales	__Chitinophagaceae	__Rurimicrobium	__Rurimicrobium arvi	1	1	NR_159218.1	NA	NA	0	0	0	0	0	0	0	0	0	0	0	0	0	0	0	0	0	0	0	0	0	0	0	0	0	0	0	0	0	0	0	0	0	0	0	0
denovo436	Bacteria; __Bacteroidetes; __Sphingobacteriia; __Sphingobacteriales; __Sphingobacteriaceae; __Pedobacter; __Pedobacter solisilvae	Bacteria	__Bacteroidetes	__Sphingobacteriia	__Sphingobacteriales	__Sphingobacteriaceae	__Pedobacter	__Pedobacter solisilvae	1	1	NR_159137.1	NA	NA	0	0	0	0	0	0	0	0	0	0	0	0	0	0	0	0	0	0	0	0	0	0	0	0	0	0	0	0	0	0	0	0	0	0	0	0
denovo437	Bacteria; __Proteobacteria; __Alphaproteobacteria; __Rhodobacterales; __Rhodobacteraceae; __Amaricoccus; __Amaricoccus macauensis	Bacteria	__Proteobacteria	__Alphaproteobacteria	__Rhodobacterales	__Rhodobacteraceae	__Amaricoccus	__Amaricoccus macauensis	1	1	NR_029202.1	NA	NA	0	0	3	0	0	0	0	0	0	0	0	0	0	0	0	0	0	0	0	0	0	0	0	0	0	0	0	0	0	0	0	0	0	0	0	0
denovo438	Bacteria; __Actinobacteria; __Actinobacteria; __Bifidobacteriales; __Bifidobacteriaceae; __Gardnerella; __Gardnerella vaginalis	Bacteria	__Actinobacteria	__Actinobacteria	__Bifidobacteriales	__Bifidobacteriaceae	__Gardnerella	__Gardnerella vaginalis	1	1	NR_118377.1	NA	NA	0	0	9	0	0	0	0	0	0	0	0	0	0	0	0	0	0	0	0	0	0	0	0	0	0	0	0	0	0	0	0	0	0	0	0	0
denovo439	Bacteria; __Firmicutes; __Bacilli; __Lactobacillales; __Lactobacillaceae; __Lactobacillus; __Lactobacillus coryniformis	Bacteria	__Firmicutes	__Bacilli	__Lactobacillales	__Lactobacillaceae	__Lactobacillus	__Lactobacillus coryniformis	1	1	NR_029018.1	NA	NA	0	0	0	0	0	0	0	0	0	0	0	0	0	0	0	0	0	0	0	0	0	0	0	0	0	0	0	0	0	0	0	0	0	0	0	0
denovo440	Bacteria; __Bacteroidetes; __Sphingobacteriia; __Sphingobacteriales; __Sphingobacteriaceae; __Pedobacter; __Pedobacter solisilvae	Bacteria	__Bacteroidetes	__Sphingobacteriia	__Sphingobacteriales	__Sphingobacteriaceae	__Pedobacter	__Pedobacter solisilvae	1	1	NR_159137.1	NA	NA	0	0	0	0	0	0	0	0	0	0	0	0	0	0	0	0	0	0	0	0	0	0	0	0	0	0	0	0	0	0	0	0	0	0	0	0
denovo441	Bacteria; __Actinobacteria; __Acidimicrobiia; __Acidimicrobiales; __Iamiaceae; __Iamia; __Iamia majanohamensis	Bacteria	__Actinobacteria	__Acidimicrobiia	__Acidimicrobiales	__Iamiaceae	__Iamia	__Iamia majanohamensis	1	1	NR_041634.1	NA	NA	0	0	0	0	0	0	0	0	0	0	0	0	0	0	0	0	0	0	0	0	0	0	0	0	0	0	0	0	0	0	0	0	3	0	0	0
denovo442	Bacteria; __Firmicutes; __Clostridia; __Clostridiales; __Clostridiaceae; __Clostridium; __Clostridium saudiense	Bacteria	__Firmicutes	__Clostridia	__Clostridiales	__Clostridiaceae	__Clostridium	__Clostridium saudiense	1	1	NR_144696.1	NA	NA	0	0	0	0	0	0	0	0	0	0	0	0	0	0	0	0	0	0	0	0	0	0	0	0	0	0	0	0	0	0	0	0	0	0	0	0
denovo443	Bacteria; __Proteobacteria; __Gammaproteobacteria; __Pseudomonadales; __Pseudomonadaceae; __Pseudomonas; __Pseudomonas chengduensis	Bacteria	__Proteobacteria	__Gammaproteobacteria	__Pseudomonadales	__Pseudomonadaceae	__Pseudomonas	__Pseudomonas chengduensis	1	1	NR_125523.1	NA	NA	0	0	0	0	0	0	0	0	0	0	1	0	0	0	0	0	0	2	0	0	0	0	0	0	0	0	0	0	0	0	0	0	0	0	0	0
denovo444	Bacteria; __Proteobacteria; __Betaproteobacteria; __Burkholderiales; __Oxalobacteraceae; __Lacisediminimonas; __Lacisediminimonas profundi	Bacteria	__Proteobacteria	__Betaproteobacteria	__Burkholderiales	__Oxalobacteraceae	__Lacisediminimonas	__Lacisediminimonas profundi	1	1	NR_165788.1	NA	NA	0	0	0	0	0	0	0	0	0	0	0	0	0	0	0	0	0	0	0	0	0	0	0	0	0	0	0	0	0	0	0	0	0	0	0	0
denovo445	Bacteria; __Proteobacteria; __Gammaproteobacteria; __Enterobacterales; __Enterobacteriaceae; __Rosenbergiella; __Rosenbergiella epipactidis	Bacteria	__Proteobacteria	__Gammaproteobacteria	__Enterobacterales	__Enterobacteriaceae	__Rosenbergiella	__Rosenbergiella epipactidis	1	1	NR_126303.1	NA	NA	0	0	0	0	0	0	0	0	0	0	0	0	0	0	0	0	0	0	0	0	0	6	0	0	0	0	0	0	0	0	0	0	0	0	0	0
denovo446	Bacteria; __Proteobacteria; __Gammaproteobacteria; __Enterobacterales; __Yersiniaceae; __Yersinia; __Yersinia entomophaga	Bacteria	__Proteobacteria	__Gammaproteobacteria	__Enterobacterales	__Yersiniaceae	__Yersinia	__Yersinia entomophaga	1	1	NR_115759.1	NA	NA	0	0	0	1	0	0	0	0	0	0	1	0	0	0	0	0	0	1	0	0	0	0	0	0	0	0	0	0	0	0	0	0	0	0	0	0
denovo447	Bacteria; __Proteobacteria; __Betaproteobacteria; __Burkholderiales; __; __Aquincola; __Aquincola tertiaricarbonis	Bacteria	__Proteobacteria	__Betaproteobacteria	__Burkholderiales	__	__Aquincola	__Aquincola tertiaricarbonis	1	1	NR_043913.1	NA	NA	0	0	0	0	0	0	0	0	0	0	0	0	0	0	0	0	0	0	0	0	0	0	0	3	0	0	0	0	0	0	0	0	0	0	0	0
denovo448	Bacteria; __Proteobacteria; __Gammaproteobacteria; __Aeromonadales; __Aeromonadaceae; __Aeromonas; __Aeromonas taiwanensis	Bacteria	__Proteobacteria	__Gammaproteobacteria	__Aeromonadales	__Aeromonadaceae	__Aeromonas	__Aeromonas taiwanensis	1	1	NR_116585.1	NA	NA	0	0	0	0	0	0	0	0	0	0	0	0	0	0	0	0	0	0	0	0	0	0	0	0	0	0	0	0	0	0	0	0	0	0	0	0
denovo449	Bacteria; __Proteobacteria; __Alphaproteobacteria; __Rhodospirillales; __Acetobacteraceae; __Gluconobacter; __Gluconobacter japonicus	Bacteria	__Proteobacteria	__Alphaproteobacteria	__Rhodospirillales	__Acetobacteraceae	__Gluconobacter	__Gluconobacter japonicus	1	1	NR_118638.1	NA	NA	0	0	0	0	0	0	0	0	0	0	0	0	0	0	0	0	0	0	0	0	0	0	0	0	0	0	0	0	2	0	0	0	0	0	5	0
denovo450	Bacteria; __Actinobacteria; __Actinobacteria; __Corynebacteriales; __Corynebacteriaceae; __Corynebacterium; __Corynebacterium otitidis	Bacteria	__Actinobacteria	__Actinobacteria	__Corynebacteriales	__Corynebacteriaceae	__Corynebacterium	__Corynebacterium otitidis	1	1	NR_026120.1	NA	NA	0	0	0	0	0	0	0	0	0	0	0	0	0	0	0	0	0	0	0	0	0	0	0	0	0	0	0	0	0	0	0	0	0	0	0	0
denovo451	Bacteria; __Actinobacteria; __Actinobacteria; __Propionibacteriales; __Nocardioidaceae; __Marmoricola; __Marmoricola scoriae	Bacteria	__Actinobacteria	__Actinobacteria	__Propionibacteriales	__Nocardioidaceae	__Marmoricola	__Marmoricola scoriae	1	1	NR_116965.1	NA	NA	0	0	0	0	0	0	0	0	0	0	0	0	0	0	0	0	0	0	0	0	0	3	0	0	0	0	0	0	0	0	0	0	0	0	0	0
denovo452	Bacteria; __Proteobacteria; __Alphaproteobacteria; __Rhizobiales; __Xanthobacteraceae; __Pseudoxanthobacter; __Pseudoxanthobacter soli	Bacteria	__Proteobacteria	__Alphaproteobacteria	__Rhizobiales	__Xanthobacteraceae	__Pseudoxanthobacter	__Pseudoxanthobacter soli	1	1	NR_044225.1	NA	NA	0	0	0	0	0	0	0	0	0	0	0	0	0	0	0	0	0	0	0	0	0	0	0	0	0	0	0	0	0	0	0	0	0	0	0	0
denovo453	Bacteria; __Actinobacteria; __Actinobacteria; __Streptomycetales; __Streptomycetaceae; __Streptomyces; __Streptomyces asenjonii	Bacteria	__Actinobacteria	__Actinobacteria	__Streptomycetales	__Streptomycetaceae	__Streptomyces	__Streptomyces asenjonii	1	1	NR_152642.1	NA	NA	0	0	3	0	0	0	0	0	0	0	0	0	0	0	0	0	0	0	0	0	0	0	0	0	0	0	0	0	0	0	0	0	0	0	0	0
denovo454	Bacteria; __Proteobacteria; __Gammaproteobacteria; __Enterobacterales; __Yersiniaceae; __Yersinia; __Yersinia enterocolitica	Bacteria	__Proteobacteria	__Gammaproteobacteria	__Enterobacterales	__Yersiniaceae	__Yersinia	__Yersinia enterocolitica	1	1	NR_104903.1	NA	NA	0	0	0	0	0	0	0	0	0	0	0	0	0	0	0	0	0	0	0	0	0	0	0	0	0	0	0	0	0	0	0	0	0	0	0	0
denovo455	Bacteria; __Proteobacteria; __Gammaproteobacteria; __Pseudomonadales; __Pseudomonadaceae; __Pseudomonas; __Pseudomonas xiamenensis	Bacteria	__Proteobacteria	__Gammaproteobacteria	__Pseudomonadales	__Pseudomonadaceae	__Pseudomonas	__Pseudomonas xiamenensis	1	1	NR_043533.1	NA	NA	0	0	0	0	0	0	0	0	0	0	0	0	0	0	0	0	0	0	0	0	0	0	0	0	0	0	0	0	0	0	0	0	0	0	0	0
denovo456	Bacteria; __Acidobacteria; __Thermoanaerobaculia; __Thermoanaerobaculales; __Thermoanaerobaculaceae; __Thermoanaerobaculum; __Thermoanaerobaculum aquaticum	Bacteria	__Acidobacteria	__Thermoanaerobaculia	__Thermoanaerobaculales	__Thermoanaerobaculaceae	__Thermoanaerobaculum	__Thermoanaerobaculum aquaticum	1	1	NR_109681.1	NA	NA	0	0	0	0	0	0	0	0	0	0	0	0	0	0	0	0	0	0	0	0	0	0	0	0	0	0	0	0	0	0	0	0	0	0	0	0
denovo457	Bacteria; __Proteobacteria; __Gammaproteobacteria; __Pseudomonadales; __Pseudomonadaceae; __Pseudomonas; __Pseudomonas chengduensis	Bacteria	__Proteobacteria	__Gammaproteobacteria	__Pseudomonadales	__Pseudomonadaceae	__Pseudomonas	__Pseudomonas chengduensis	1	1	NR_125523.1	NA	NA	0	0	0	0	0	0	0	0	0	0	0	0	0	0	0	6	0	6	0	0	0	0	0	0	0	0	0	0	0	0	0	0	0	0	0	0
denovo458	Bacteria; __Proteobacteria; __Alphaproteobacteria; __Rhizobiales; __Phyllobacteriaceae; __Phyllobacterium; __Phyllobacterium endophyticum	Bacteria	__Proteobacteria	__Alphaproteobacteria	__Rhizobiales	__Phyllobacteriaceae	__Phyllobacterium	__Phyllobacterium endophyticum	1	1	NR_109517.1	NA	NA	0	0	0	0	0	0	0	0	0	0	0	3	1	0	0	0	0	0	0	0	0	0	0	2	0	0	0	0	0	0	0	0	0	0	0	0
denovo459	Bacteria; __Proteobacteria; __Betaproteobacteria; __Neisseriales; __Neisseriaceae; __Neisseria; __Neisseria elongata	Bacteria	__Proteobacteria	__Betaproteobacteria	__Neisseriales	__Neisseriaceae	__Neisseria	__Neisseria elongata	1	1	NR_104944.1	NA	NA	0	0	0	0	0	0	0	0	0	0	0	0	0	0	0	0	0	0	0	0	0	0	0	0	0	0	0	0	0	0	0	3	0	0	0	0
denovo460	Bacteria; __Bacteroidetes; __Cytophagia; __Cytophagales; __Cytophagaceae; __Spirosoma; __Spirosoma horti	Bacteria	__Bacteroidetes	__Cytophagia	__Cytophagales	__Cytophagaceae	__Spirosoma	__Spirosoma horti	1	1	NR_159898.1	NA	NA	0	0	0	0	0	0	0	0	0	0	0	0	3	0	0	0	0	0	0	0	0	0	0	0	0	0	0	0	0	0	0	0	0	0	0	0
denovo461	Bacteria; __Chloroflexi; __Anaerolineae; __Anaerolineales; __Anaerolineaceae; __Bellilinea; __Bellilinea caldifistulae	Bacteria	__Chloroflexi	__Anaerolineae	__Anaerolineales	__Anaerolineaceae	__Bellilinea	__Bellilinea caldifistulae	1	1	NR_041354.1	NA	NA	0	0	0	0	0	0	15	0	0	0	0	0	0	0	0	0	0	0	0	0	0	0	0	0	0	0	0	0	0	0	0	0	0	0	0	0
denovo462	Bacteria; __Proteobacteria; __Gammaproteobacteria; __Xanthomonadales; __Xanthomonadaceae; __Stenotrophomonas; __Stenotrophomonas maltophilia	Bacteria	__Proteobacteria	__Gammaproteobacteria	__Xanthomonadales	__Xanthomonadaceae	__Stenotrophomonas	__Stenotrophomonas maltophilia	1	1	NR_040804.1	NA	NA	0	0	0	0	0	0	0	0	0	0	0	0	0	0	0	0	0	3	0	0	0	0	0	0	0	0	0	0	0	0	0	0	0	0	0	0
denovo463	Bacteria; __Proteobacteria; __Gammaproteobacteria; __Enterobacterales; __Yersiniaceae; __Serratia; __Serratia oryzae	Bacteria	__Proteobacteria	__Gammaproteobacteria	__Enterobacterales	__Yersiniaceae	__Serratia	__Serratia oryzae	1	1	NR_157762.1	NA	NA	0	0	0	0	0	0	0	0	0	3	0	0	0	0	0	0	0	0	0	0	0	0	0	0	0	0	0	0	0	0	0	0	0	0	0	0
denovo464	Bacteria; __Proteobacteria; __Gammaproteobacteria; __Aeromonadales; __Aeromonadaceae; __Aeromonas; __Aeromonas hydrophila	Bacteria	__Proteobacteria	__Gammaproteobacteria	__Aeromonadales	__Aeromonadaceae	__Aeromonas	__Aeromonas hydrophila	1	1	NR_074841.1	NA	NA	0	0	0	0	0	0	0	0	0	0	0	0	0	0	0	0	0	0	0	0	0	0	0	0	0	0	0	0	0	0	0	0	0	0	0	0
denovo465	Bacteria; __Proteobacteria; __Gammaproteobacteria; __Xanthomonadales; __Rhodanobacteraceae; __Chiayiivirga; __Chiayiivirga flava	Bacteria	__Proteobacteria	__Gammaproteobacteria	__Xanthomonadales	__Rhodanobacteraceae	__Chiayiivirga	__Chiayiivirga flava	1	1	NR_132298.1	NA	NA	0	0	0	0	0	0	0	0	0	0	0	0	0	0	0	0	0	0	0	0	0	0	0	0	0	0	0	0	0	0	0	0	0	0	0	0
denovo466	Bacteria; __Bacteroidetes; __Sphingobacteriia; __Sphingobacteriales; __Sphingobacteriaceae; __Mucilaginibacter; __Mucilaginibacter terrigena	Bacteria	__Bacteroidetes	__Sphingobacteriia	__Sphingobacteriales	__Sphingobacteriaceae	__Mucilaginibacter	__Mucilaginibacter terrigena	1	1	NR_165740.1	NA	NA	0	0	0	0	0	0	0	0	0	0	0	0	0	0	0	0	0	0	0	0	0	0	0	0	0	0	0	0	0	0	0	0	0	0	0	0
denovo467	Bacteria; __Firmicutes; __Bacilli; __Bacillales; __Paenibacillaceae; __Cohnella; __Cohnella yongneupensis	Bacteria	__Firmicutes	__Bacilli	__Bacillales	__Paenibacillaceae	__Cohnella	__Cohnella yongneupensis	1	1	NR_115997.1	NA	NA	0	0	0	0	0	0	0	0	0	0	0	0	0	0	0	0	0	0	0	0	0	0	0	0	0	0	0	0	0	0	0	0	0	0	0	0
denovo468	Bacteria; __Bacteroidetes; __Bacteroidia; __Bacteroidales; __Bacteroidaceae; __Bacteroides; __Bacteroides salyersiae	Bacteria	__Bacteroidetes	__Bacteroidia	__Bacteroidales	__Bacteroidaceae	__Bacteroides	__Bacteroides salyersiae	1	1	NR_043016.1	NA	NA	0	0	0	0	0	0	0	0	0	0	0	0	0	0	0	0	0	0	0	0	0	0	0	0	0	0	0	0	0	0	0	3	0	0	0	0
denovo469	; __; __; __; __; __; __		__	__	__	__	__	__	1	1	NA	NA	NA	0	0	0	0	0	0	0	0	0	0	0	0	0	0	0	0	0	0	0	0	0	0	0	0	0	0	0	0	0	0	0	0	0	0	0	0
denovo470	Bacteria; __Firmicutes; __Clostridia; __Clostridiales; __Peptococcaceae; __Peptococcus; __Peptococcus niger	Bacteria	__Firmicutes	__Clostridia	__Clostridiales	__Peptococcaceae	__Peptococcus	__Peptococcus niger	1	1	NR_113393.1	NA	NA	0	0	0	0	0	0	0	0	0	0	0	0	0	0	0	0	0	0	0	0	0	0	0	0	0	0	0	0	0	0	0	0	0	0	0	0
denovo471	Bacteria; __Proteobacteria; __Gammaproteobacteria; __Pseudomonadales; __Pseudomonadaceae; __Pseudomonas; __Pseudomonas veronii	Bacteria	__Proteobacteria	__Gammaproteobacteria	__Pseudomonadales	__Pseudomonadaceae	__Pseudomonas	__Pseudomonas veronii	1	1	NR_028706.1	NA	NA	0	0	0	0	0	0	0	0	0	0	0	0	0	0	0	2	0	4	0	0	0	0	0	0	0	0	0	0	0	0	0	0	0	0	0	0
denovo472	Bacteria; __Firmicutes; __Bacilli; __Lactobacillales; __Aerococcaceae; __Facklamia; __Facklamia hominis	Bacteria	__Firmicutes	__Bacilli	__Lactobacillales	__Aerococcaceae	__Facklamia	__Facklamia hominis	1	1	NR_026393.1	NA	NA	0	0	0	0	0	0	0	0	0	0	0	0	0	3	0	0	0	0	0	0	0	0	0	0	0	0	0	0	0	0	0	0	3	0	0	0
denovo473	Bacteria; __Bacteroidetes; __Chitinophagia; __Chitinophagales; __Chitinophagaceae; __Ferruginibacter; __Ferruginibacter paludis	Bacteria	__Bacteroidetes	__Chitinophagia	__Chitinophagales	__Chitinophagaceae	__Ferruginibacter	__Ferruginibacter paludis	1	1	NR_136802.1	NA	NA	0	0	0	0	0	0	0	0	3	0	0	0	0	0	0	0	0	0	0	0	0	0	0	0	0	0	0	0	0	0	0	0	0	0	0	0
denovo474	Bacteria; __Proteobacteria; __Betaproteobacteria; __Rhodocyclales; __Zoogloeaceae; __Zoogloea; __Zoogloea resiniphila	Bacteria	__Proteobacteria	__Betaproteobacteria	__Rhodocyclales	__Zoogloeaceae	__Zoogloea	__Zoogloea resiniphila	1	1	NR_027188.1	NA	NA	0	0	0	0	0	0	0	0	0	0	0	0	0	0	0	0	0	0	0	0	0	0	0	0	0	0	0	0	0	0	0	0	0	0	0	0
denovo475	Bacteria; __Proteobacteria; __Gammaproteobacteria; __Xanthomonadales; __Xanthomonadaceae; __Lysobacter; __Lysobacter oculi	Bacteria	__Proteobacteria	__Gammaproteobacteria	__Xanthomonadales	__Xanthomonadaceae	__Lysobacter	__Lysobacter oculi	1	1	NR_165778.1	NA	NA	1	0	0	0	0	0	0	0	0	0	0	0	0	0	0	0	0	0	0	0	0	0	0	0	0	0	0	0	0	0	0	2	0	0	0	0
denovo476	Bacteria; __Bacteroidetes; __Cytophagia; __Cytophagales; __Cytophagaceae; __Larkinella; __Larkinella arboricola	Bacteria	__Bacteroidetes	__Cytophagia	__Cytophagales	__Cytophagaceae	__Larkinella	__Larkinella arboricola	1	1	NR_116968.1	NA	NA	0	0	6	0	0	0	0	0	0	0	0	0	0	0	0	0	0	0	0	0	0	0	0	0	0	0	0	0	0	0	0	0	0	0	0	0
denovo477	Bacteria; __Bacteroidetes; __Bacteroidia; __Bacteroidales; __Prevotellaceae; __Prevotella; __Prevotella shahii	Bacteria	__Bacteroidetes	__Bacteroidia	__Bacteroidales	__Prevotellaceae	__Prevotella	__Prevotella shahii	1	1	NR_024815.1	NA	NA	0	0	0	0	0	0	0	0	0	0	0	0	0	0	0	0	0	0	0	0	0	0	0	0	0	0	0	0	0	0	0	0	0	0	0	0
denovo478	Bacteria; __Proteobacteria; __Alphaproteobacteria; __Rhizobiales; __Phyllobacteriaceae; __Aminobacter; __Aminobacter niigataensis	Bacteria	__Proteobacteria	__Alphaproteobacteria	__Rhizobiales	__Phyllobacteriaceae	__Aminobacter	__Aminobacter niigataensis	1	1	NR_025302.1	NA	NA	0	0	0	0	0	0	0	0	0	0	0	2	2	0	0	0	0	0	0	0	0	0	0	2	0	0	0	0	0	0	0	0	0	0	0	0
denovo479	; __; __; __; __; __; __		__	__	__	__	__	__	1	1	NA	NA	NA	0	0	6	0	0	0	0	0	0	0	0	0	0	0	0	0	0	0	0	0	0	0	0	0	0	0	0	0	0	0	0	0	0	0	0	0
denovo480	Bacteria; __Proteobacteria; __Gammaproteobacteria; __Pseudomonadales; __Pseudomonadaceae; __Pseudomonas; __Pseudomonas canadensis	Bacteria	__Proteobacteria	__Gammaproteobacteria	__Pseudomonadales	__Pseudomonadaceae	__Pseudomonas	__Pseudomonas canadensis	1	1	NR_156852.1	NA	NA	0	0	0	0	0	0	0	0	0	0	0	0	0	0	0	0	0	0	0	0	0	0	0	0	0	0	0	0	0	0	0	0	0	0	0	0
denovo481	Bacteria; __Proteobacteria; __Alphaproteobacteria; __Rhizobiales; __Phyllobacteriaceae; __Phyllobacterium; __Phyllobacterium myrsinacearum	Bacteria	__Proteobacteria	__Alphaproteobacteria	__Rhizobiales	__Phyllobacteriaceae	__Phyllobacterium	__Phyllobacterium myrsinacearum	1	1	NR_113874.1	NA	NA	0	0	0	0	0	0	0	0	0	0	0	0	0	0	0	0	0	0	0	0	0	0	0	3	0	0	0	0	0	0	0	0	0	0	0	0
denovo482	Bacteria; __Firmicutes; __Bacilli; __Lactobacillales; __Lactobacillaceae; __Lactobacillus; __Lactobacillus iners	Bacteria	__Firmicutes	__Bacilli	__Lactobacillales	__Lactobacillaceae	__Lactobacillus	__Lactobacillus iners	1	1	NR_036982.1	NA	NA	0	0	0	0	0	0	0	0	0	0	0	0	0	0	0	0	0	0	0	0	0	0	0	0	0	0	0	0	0	0	0	0	0	0	0	0
denovo483	Bacteria; __Bacteroidetes; __Cytophagia; __Cytophagales; __Hymenobacteraceae; __Pontibacter; __Pontibacter humi	Bacteria	__Bacteroidetes	__Cytophagia	__Cytophagales	__Hymenobacteraceae	__Pontibacter	__Pontibacter humi	1	1	NR_134791.1	NA	NA	0	0	0	0	0	0	0	0	0	0	0	0	0	0	0	0	0	0	0	0	0	0	0	0	0	0	0	0	0	0	0	3	0	0	0	0
denovo484	Bacteria; __Actinobacteria; __Actinobacteria; __Micrococcales; __Microbacteriaceae; __Curtobacterium; __Curtobacterium herbarum	Bacteria	__Actinobacteria	__Actinobacteria	__Micrococcales	__Microbacteriaceae	__Curtobacterium	__Curtobacterium herbarum	1	1	NR_025461.1	NA	NA	0	0	0	0	0	0	0	0	0	0	0	0	0	0	0	0	0	0	0	0	0	0	0	0	0	0	0	0	0	0	0	0	0	0	0	0
denovo485	Bacteria; __Proteobacteria; __Alphaproteobacteria; __Caulobacterales; __Caulobacteraceae; __Caulobacter; __Caulobacter profundus	Bacteria	__Proteobacteria	__Alphaproteobacteria	__Caulobacterales	__Caulobacteraceae	__Caulobacter	__Caulobacter profundus	1	1	NR_133716.1	NA	NA	0	0	0	0	0	0	0	0	0	0	0	0	0	0	0	0	0	0	0	0	0	0	0	0	0	0	0	0	0	0	0	0	0	0	0	0
denovo486	Bacteria; __Actinobacteria; __Thermoleophilia; __Solirubrobacterales; __Parviterribacteraceae; __Parviterribacter; __Parviterribacter multiflagellatus	Bacteria	__Actinobacteria	__Thermoleophilia	__Solirubrobacterales	__Parviterribacteraceae	__Parviterribacter	__Parviterribacter multiflagellatus	1	1	NR_148602.1	NA	NA	0	0	0	0	0	0	0	0	0	0	0	0	0	3	0	0	0	0	0	0	0	0	0	0	0	0	0	0	0	0	0	0	0	0	0	0
denovo487	Bacteria; __Proteobacteria; __Gammaproteobacteria; __Enterobacterales; __Enterobacteriaceae; __Enterobacter; __Enterobacter mori	Bacteria	__Proteobacteria	__Gammaproteobacteria	__Enterobacterales	__Enterobacteriaceae	__Enterobacter	__Enterobacter mori	1	1	NR_146667.2	NA	NA	0	0	0	0	0	0	0	0	0	0	0	0	0	0	0	0	0	0	0	0	0	0	0	0	0	0	0	0	3	0	0	0	0	0	0	0
denovo488	Bacteria; __Bacteroidetes; __Sphingobacteriia; __Sphingobacteriales; __Sphingobacteriaceae; __Pedobacter; __Pedobacter lotistagni	Bacteria	__Bacteroidetes	__Sphingobacteriia	__Sphingobacteriales	__Sphingobacteriaceae	__Pedobacter	__Pedobacter lotistagni	1	1	NR_136442.1	NA	NA	0	0	0	0	0	0	0	0	0	0	0	0	0	0	0	0	0	0	0	0	0	0	0	0	0	0	0	0	0	0	0	0	0	0	0	0
denovo489	; __; __; __; __; __; __		__	__	__	__	__	__	1	1	NA	NA	NA	0	0	0	0	0	0	0	0	0	0	0	0	0	0	0	0	0	0	0	0	0	0	0	0	0	0	0	0	0	0	0	0	0	0	0	0
denovo490	Bacteria; __Proteobacteria; __Gammaproteobacteria; __Enterobacterales; __; __Phytobacter; __Phytobacter ursingii	Bacteria	__Proteobacteria	__Gammaproteobacteria	__Enterobacterales	__	__Phytobacter	__Phytobacter ursingii	1	1	NR_159305.1	NA	NA	0	0	0	0	0	0	0	0	0	0	0	0	0	0	0	0	0	0	0	0	0	0	0	0	0	0	0	3	0	0	0	0	0	0	0	0
denovo491	Bacteria; __Proteobacteria; __Gammaproteobacteria; __Pseudomonadales; __Pseudomonadaceae; __Pseudomonas; __Pseudomonas orientalis	Bacteria	__Proteobacteria	__Gammaproteobacteria	__Pseudomonadales	__Pseudomonadaceae	__Pseudomonas	__Pseudomonas orientalis	1	1	NR_024909.1	NA	NA	0	0	0	0	0	0	0	0	0	0	0	0	0	0	0	3	0	0	0	0	0	0	0	0	0	0	0	0	0	0	0	0	0	0	0	0
denovo492	; __; __; __; __; __; __		__	__	__	__	__	__	1	1	NA	NA	NA	0	0	0	0	0	0	0	0	0	0	0	0	0	0	0	0	0	0	0	0	0	0	0	0	0	0	0	0	0	0	0	0	0	0	0	3
denovo493	Bacteria; __Proteobacteria; __Gammaproteobacteria; __Enterobacterales; __Yersiniaceae; __Serratia; __Serratia oryzae	Bacteria	__Proteobacteria	__Gammaproteobacteria	__Enterobacterales	__Yersiniaceae	__Serratia	__Serratia oryzae	1	1	NR_157762.1	NA	NA	0	0	0	0	0	0	0	0	0	0	4	0	0	0	0	1	0	0	0	0	0	0	0	0	0	0	0	0	0	0	0	0	0	0	0	0
denovo494	Bacteria; __Proteobacteria; __Alphaproteobacteria; __Rhizobiales; __Methylobacteriaceae; __Microvirga; __Microvirga subterranea	Bacteria	__Proteobacteria	__Alphaproteobacteria	__Rhizobiales	__Methylobacteriaceae	__Microvirga	__Microvirga subterranea	1	1	NR_104766.1	NA	NA	0	0	3	0	0	0	0	0	0	0	0	0	0	0	0	0	0	0	0	0	0	0	0	0	0	0	0	0	0	0	0	0	0	0	0	0
denovo495	Bacteria; __Proteobacteria; __Gammaproteobacteria; __Pseudomonadales; __Pseudomonadaceae; __Pseudomonas; __Pseudomonas grimontii	Bacteria	__Proteobacteria	__Gammaproteobacteria	__Pseudomonadales	__Pseudomonadaceae	__Pseudomonas	__Pseudomonas grimontii	1	1	NR_025102.1	NA	NA	0	0	0	0	0	0	0	0	0	0	1	0	0	0	0	0	1	0	0	0	0	0	0	0	0	0	0	0	0	0	0	0	0	0	0	0
denovo496	Bacteria; __Proteobacteria; __Gammaproteobacteria; __Enterobacterales; __Enterobacteriaceae; __Raoultella; __Raoultella ornithinolytica	Bacteria	__Proteobacteria	__Gammaproteobacteria	__Enterobacterales	__Enterobacteriaceae	__Raoultella	__Raoultella ornithinolytica	1	1	NR_044799.1	NA	NA	0	0	0	0	0	0	0	0	0	0	0	0	0	0	0	0	0	0	0	0	0	0	0	0	0	0	0	0	0	0	0	0	0	0	1	0
denovo497	Bacteria; __Bacteroidetes; __Flavobacteriia; __Flavobacteriales; __Flavobacteriaceae; __Bergeyella; __Bergeyella porcorum	Bacteria	__Bacteroidetes	__Flavobacteriia	__Flavobacteriales	__Flavobacteriaceae	__Bergeyella	__Bergeyella porcorum	1	1	NR_136869.1	NA	NA	0	0	0	0	0	0	1	0	0	0	0	0	0	0	0	0	0	0	0	0	0	0	0	0	0	0	0	0	0	0	0	0	0	0	0	0
denovo498	Bacteria; __Firmicutes; __Bacilli; __Bacillales; __Staphylococcaceae; __Jeotgalicoccus; __Jeotgalicoccus schoeneichii	Bacteria	__Firmicutes	__Bacilli	__Bacillales	__Staphylococcaceae	__Jeotgalicoccus	__Jeotgalicoccus schoeneichii	1	1	NR_151981.1	NA	NA	0	0	0	0	0	0	3	0	0	0	0	0	0	0	0	0	0	0	0	0	0	0	0	0	0	0	0	0	0	0	0	0	0	0	0	0
denovo499	Bacteria; __Proteobacteria; __Gammaproteobacteria; __Pseudomonadales; __Pseudomonadaceae; __Pseudomonas; __Pseudomonas orientalis	Bacteria	__Proteobacteria	__Gammaproteobacteria	__Pseudomonadales	__Pseudomonadaceae	__Pseudomonas	__Pseudomonas orientalis	1	1	NR_024909.1	NA	NA	0	0	0	0	0	0	0	0	0	0	0	0	0	0	0	1	0	2	0	0	0	0	0	0	0	0	0	0	0	0	0	0	0	0	0	0
denovo500	Bacteria; __Actinobacteria; __Actinobacteria; __Corynebacteriales; __Mycobacteriaceae; __Mycobacterium; __Mycobacterium florentinum	Bacteria	__Actinobacteria	__Actinobacteria	__Corynebacteriales	__Mycobacteriaceae	__Mycobacterium	__Mycobacterium florentinum	1	1	NR_042223.1	NA	NA	0	0	3	0	0	0	0	0	0	0	0	0	0	0	0	0	0	0	0	0	0	0	0	0	0	0	0	0	0	0	0	0	0	0	0	0
denovo501	Bacteria; __Bacteroidetes; __Sphingobacteriia; __Sphingobacteriales; __Sphingobacteriaceae; __Sphingobacterium; __Sphingobacterium ginsenosidimutans	Bacteria	__Bacteroidetes	__Sphingobacteriia	__Sphingobacteriales	__Sphingobacteriaceae	__Sphingobacterium	__Sphingobacterium ginsenosidimutans	1	1	NR_108689.1	NA	NA	0	0	0	0	0	0	0	0	0	0	0	0	0	0	0	0	0	0	0	0	0	0	0	0	0	0	0	0	0	0	0	0	0	0	0	0
denovo502	Bacteria; __Firmicutes; __Clostridia; __Clostridiales; __Lachnospiraceae; __Cellulosilyticum; __Cellulosilyticum lentocellum	Bacteria	__Firmicutes	__Clostridia	__Clostridiales	__Lachnospiraceae	__Cellulosilyticum	__Cellulosilyticum lentocellum	1	1	NR_119067.1	NA	NA	0	0	0	0	0	0	0	0	0	0	0	0	3	0	0	0	0	0	0	0	0	0	0	0	0	0	0	0	0	0	0	0	0	0	0	0
denovo503	Bacteria; __Proteobacteria; __Gammaproteobacteria; __Xanthomonadales; __Xanthomonadaceae; __; __[Pseudomonas] geniculata	Bacteria	__Proteobacteria	__Gammaproteobacteria	__Xanthomonadales	__Xanthomonadaceae	__	__[Pseudomonas] geniculata	1	1	NR_024708.1	NA	NA	0	0	0	0	0	0	0	0	0	0	0	0	0	0	0	1	0	5	0	0	0	0	0	0	0	0	0	0	0	0	0	0	0	0	0	0
denovo504	; __; __; __; __; __; __		__	__	__	__	__	__	1	1	NA	NA	NA	0	0	0	0	0	0	0	0	0	0	0	0	0	0	0	0	0	0	0	0	0	0	0	0	0	0	3	0	0	0	0	0	0	0	0	0
denovo505	Bacteria; __Proteobacteria; __Alphaproteobacteria; __Caulobacterales; __Caulobacteraceae; __Caulobacter; __Caulobacter hibisci	Bacteria	__Proteobacteria	__Alphaproteobacteria	__Caulobacterales	__Caulobacteraceae	__Caulobacter	__Caulobacter hibisci	1	1	NR_157984.1	NA	NA	0	0	0	0	0	0	0	0	0	0	0	0	0	0	0	0	0	0	0	0	0	0	0	0	0	0	0	0	0	0	0	0	0	0	0	0
denovo506	Bacteria; __Gemmatimonadetes; __Gemmatimonadetes; __Gemmatimonadales; __Gemmatimonadaceae; __Gemmatirosa; __Gemmatirosa kalamazoonesis	Bacteria	__Gemmatimonadetes	__Gemmatimonadetes	__Gemmatimonadales	__Gemmatimonadaceae	__Gemmatirosa	__Gemmatirosa kalamazoonesis	1	1	NR_132675.1	NA	NA	0	0	0	0	0	0	0	0	0	0	0	0	0	0	0	0	0	0	0	0	0	0	0	0	0	0	0	0	0	0	0	0	0	0	0	0
denovo507	Bacteria; __Proteobacteria; __Gammaproteobacteria; __Enterobacterales; __Yersiniaceae; __Serratia; __Serratia oryzae	Bacteria	__Proteobacteria	__Gammaproteobacteria	__Enterobacterales	__Yersiniaceae	__Serratia	__Serratia oryzae	1	1	NR_157762.1	NA	NA	0	0	0	0	0	0	0	0	0	0	0	0	0	0	0	0	2	0	0	0	0	0	0	0	0	0	0	0	0	0	0	0	0	0	0	0
denovo508	Bacteria; __Proteobacteria; __Gammaproteobacteria; __Pseudomonadales; __Pseudomonadaceae; __Pseudomonas; __Pseudomonas veronii	Bacteria	__Proteobacteria	__Gammaproteobacteria	__Pseudomonadales	__Pseudomonadaceae	__Pseudomonas	__Pseudomonas veronii	1	1	NR_028706.1	NA	NA	0	0	0	0	0	0	0	0	0	0	0	0	0	0	0	2	0	1	0	0	0	0	0	0	0	0	0	0	0	0	0	0	0	0	0	0
denovo509	Bacteria; __Bacteroidetes; __Flavobacteriia; __Flavobacteriales; __Flavobacteriaceae; __Elizabethkingia; __Elizabethkingia anophelis	Bacteria	__Bacteroidetes	__Flavobacteriia	__Flavobacteriales	__Flavobacteriaceae	__Elizabethkingia	__Elizabethkingia anophelis	1	1	NR_136481.1	NA	NA	0	0	0	0	0	0	0	0	0	0	0	0	0	0	0	0	0	0	0	0	0	0	0	0	0	0	0	0	0	0	0	0	0	0	0	0
denovo510	Bacteria; __Proteobacteria; __Oligoflexia; __Bacteriovoracales; __Bacteriovoracaceae; __Bacteriovorax; __Bacteriovorax stolpii	Bacteria	__Proteobacteria	__Oligoflexia	__Bacteriovoracales	__Bacteriovoracaceae	__Bacteriovorax	__Bacteriovorax stolpii	1	1	NR_042023.1	NA	NA	0	0	0	0	0	0	0	0	0	0	0	0	0	0	0	0	0	0	0	0	0	0	0	0	0	0	0	0	0	0	0	0	0	0	0	0
denovo511	Bacteria; __Chloroflexi; __Thermomicrobia; __Thermomicrobiales; __Thermomicrobiaceae; __Thermomicrobium; __Thermomicrobium carboxidum	Bacteria	__Chloroflexi	__Thermomicrobia	__Thermomicrobiales	__Thermomicrobiaceae	__Thermomicrobium	__Thermomicrobium carboxidum	1	1	NR_134218.1	NA	NA	0	0	0	0	0	0	0	0	0	0	0	0	3	0	0	0	0	0	0	0	0	0	0	0	0	0	0	0	0	0	0	0	0	0	0	0
denovo512	Bacteria; __Actinobacteria; __Actinobacteria; __Propionibacteriales; __Propionibacteriaceae; __Microlunatus; __Microlunatus lacustris	Bacteria	__Actinobacteria	__Actinobacteria	__Propionibacteriales	__Propionibacteriaceae	__Microlunatus	__Microlunatus lacustris	1	1	NR_028884.1	NA	NA	0	0	3	0	0	0	0	0	0	0	0	0	0	0	0	0	0	0	0	0	0	0	0	0	0	0	0	0	0	0	0	0	0	0	0	0
denovo513	Bacteria; __Bacteroidetes; __Flavobacteriia; __Flavobacteriales; __Flavobacteriaceae; __Moheibacter; __Moheibacter stercoris	Bacteria	__Bacteroidetes	__Flavobacteriia	__Flavobacteriales	__Flavobacteriaceae	__Moheibacter	__Moheibacter stercoris	1	1	NR_149791.1	NA	NA	0	3	0	0	0	0	0	0	0	0	0	0	0	0	0	0	0	0	0	0	0	0	0	0	0	0	0	0	0	0	0	0	0	0	0	0
denovo514	; __; __; __; __; __; __		__	__	__	__	__	__	1	1	NA	NA	NA	0	0	0	0	0	0	0	0	0	0	0	0	0	0	0	0	0	0	0	0	0	0	0	0	0	0	0	0	0	0	0	0	0	0	0	0
denovo515	Bacteria; __Actinobacteria; __Actinobacteria; __Micrococcales; __Microbacteriaceae; __Microbacterium; __Microbacterium azadirachtae	Bacteria	__Actinobacteria	__Actinobacteria	__Micrococcales	__Microbacteriaceae	__Microbacterium	__Microbacterium azadirachtae	1	1	NR_116502.1	NA	NA	0	0	0	0	0	0	0	0	0	0	0	0	0	0	0	0	0	0	0	0	0	0	0	0	0	0	0	0	0	0	0	0	0	0	0	0
denovo516	Bacteria; __Proteobacteria; __Alphaproteobacteria; __Rhizobiales; __Phyllobacteriaceae; __Nitratireductor; __Nitratireductor aestuarii	Bacteria	__Proteobacteria	__Alphaproteobacteria	__Rhizobiales	__Phyllobacteriaceae	__Nitratireductor	__Nitratireductor aestuarii	1	1	NR_156984.1	NA	NA	0	3	0	0	0	0	0	0	0	0	0	0	0	0	0	0	0	0	0	0	0	0	0	0	0	0	0	0	0	0	0	0	0	0	0	0
denovo517	Bacteria; __Proteobacteria; __Gammaproteobacteria; __Pseudomonadales; __Pseudomonadaceae; __Pseudomonas; __Pseudomonas tolaasii	Bacteria	__Proteobacteria	__Gammaproteobacteria	__Pseudomonadales	__Pseudomonadaceae	__Pseudomonas	__Pseudomonas tolaasii	1	1	NR_114481.1	NA	NA	0	0	0	0	0	0	0	0	0	0	0	0	0	0	0	0	0	0	0	0	0	0	0	0	0	0	0	0	0	0	0	0	0	0	0	0
denovo518	Bacteria; __Actinobacteria; __Acidimicrobiia; __Acidimicrobiales; __Ilumatobacteraceae; __Ilumatobacter; __Ilumatobacter fluminis	Bacteria	__Actinobacteria	__Acidimicrobiia	__Acidimicrobiales	__Ilumatobacteraceae	__Ilumatobacter	__Ilumatobacter fluminis	1	1	NR_041633.1	NA	NA	0	0	0	0	0	0	3	0	0	0	0	0	0	0	0	0	0	0	0	0	0	0	0	0	0	0	0	0	0	0	0	0	0	0	0	0
denovo519	Bacteria; __Actinobacteria; __Actinobacteria; __Actinomycetales; __Actinomycetaceae; __Actinomyces; __Actinomyces bowdenii	Bacteria	__Actinobacteria	__Actinobacteria	__Actinomycetales	__Actinomycetaceae	__Actinomyces	__Actinomyces bowdenii	1	1	NR_041982.1	NA	NA	0	0	0	0	0	0	0	0	0	0	0	0	0	0	3	0	0	0	0	0	0	0	0	0	0	0	0	0	0	0	0	0	0	0	0	0
denovo520	Bacteria; __Proteobacteria; __Gammaproteobacteria; __Orbales; __Orbaceae; __Gilliamella; __Gilliamella apicola	Bacteria	__Proteobacteria	__Gammaproteobacteria	__Orbales	__Orbaceae	__Gilliamella	__Gilliamella apicola	1	1	NR_121727.1	NA	NA	0	0	0	0	0	0	0	0	0	0	0	0	0	0	0	0	0	0	0	0	0	0	0	0	0	0	0	0	0	0	0	0	0	3	0	0
denovo521	Bacteria; __Bacteroidetes; __Flavobacteriia; __Flavobacteriales; __Flavobacteriaceae; __Flavobacterium; __Flavobacterium granuli	Bacteria	__Bacteroidetes	__Flavobacteriia	__Flavobacteriales	__Flavobacteriaceae	__Flavobacterium	__Flavobacterium granuli	1	1	NR_114020.1	NA	NA	3	0	0	0	0	0	0	0	0	0	0	0	0	0	0	0	0	0	0	0	0	0	0	0	0	0	0	0	0	0	0	0	0	0	0	0
denovo522	Bacteria; __Proteobacteria; __Gammaproteobacteria; __Enterobacterales; __Yersiniaceae; __Serratia; __Serratia oryzae	Bacteria	__Proteobacteria	__Gammaproteobacteria	__Enterobacterales	__Yersiniaceae	__Serratia	__Serratia oryzae	1	1	NR_157762.1	NA	NA	0	0	0	0	0	0	0	0	0	0	0	0	0	0	0	0	0	0	0	0	0	0	0	0	0	0	0	0	0	0	0	0	0	0	0	0
denovo523	Bacteria; __Proteobacteria; __Gammaproteobacteria; __Enterobacterales; __Yersiniaceae; __Serratia; __Serratia oryzae	Bacteria	__Proteobacteria	__Gammaproteobacteria	__Enterobacterales	__Yersiniaceae	__Serratia	__Serratia oryzae	1	1	NR_157762.1	NA	NA	0	0	0	0	0	0	0	0	0	0	0	0	0	0	0	0	0	3	0	0	0	0	0	0	0	0	0	0	0	0	0	0	0	0	0	0
denovo524	Bacteria; __Proteobacteria; __Alphaproteobacteria; __Rhizobiales; __Rhizobiaceae; __Rhizobium; __Rhizobium daejeonense	Bacteria	__Proteobacteria	__Alphaproteobacteria	__Rhizobiales	__Rhizobiaceae	__Rhizobium	__Rhizobium daejeonense	1	1	NR_114121.1	NA	NA	0	0	0	0	0	0	0	0	0	0	0	0	0	0	0	0	0	0	0	0	0	0	0	0	0	0	0	0	0	0	0	0	0	0	0	0
denovo525	Bacteria; __Proteobacteria; __Alphaproteobacteria; __Sphingomonadales; __Sphingomonadaceae; __Sphingomonas; __Sphingomonas rhizophila	Bacteria	__Proteobacteria	__Alphaproteobacteria	__Sphingomonadales	__Sphingomonadaceae	__Sphingomonas	__Sphingomonas rhizophila	1	1	NR_159352.1	NA	NA	0	0	0	0	0	0	0	0	0	0	0	0	0	0	0	0	0	0	0	0	0	0	0	0	0	0	0	0	0	0	0	0	0	0	0	0
denovo526	Bacteria; __Proteobacteria; __Gammaproteobacteria; __Pseudomonadales; __Pseudomonadaceae; __Pseudomonas; __Pseudomonas marginalis	Bacteria	__Proteobacteria	__Gammaproteobacteria	__Pseudomonadales	__Pseudomonadaceae	__Pseudomonas	__Pseudomonas marginalis	1	1	NR_117821.1	NA	NA	0	0	0	0	0	0	0	0	0	0	1	0	0	0	0	0	0	0	0	0	0	0	0	0	0	0	0	0	0	0	0	0	0	0	0	0
denovo527	Bacteria; __Proteobacteria; __Alphaproteobacteria; __Caulobacterales; __Caulobacteraceae; __Brevundimonas; __Brevundimonas olei	Bacteria	__Proteobacteria	__Alphaproteobacteria	__Caulobacterales	__Caulobacteraceae	__Brevundimonas	__Brevundimonas olei	1	1	NR_117268.1	NA	NA	0	0	0	0	0	0	0	0	0	0	0	0	0	0	0	0	0	0	0	0	0	0	0	0	0	0	0	0	0	0	0	0	0	0	0	0
denovo528	Bacteria; __Actinobacteria; __Actinobacteria; __Micrococcales; __Microbacteriaceae; __Leifsonia; __Leifsonia rubra	Bacteria	__Actinobacteria	__Actinobacteria	__Micrococcales	__Microbacteriaceae	__Leifsonia	__Leifsonia rubra	1	1	NR_028012.1	NA	NA	0	0	0	0	0	0	0	0	0	0	0	0	0	0	0	0	0	0	0	0	0	0	0	0	0	0	0	0	1	0	0	1	0	0	1	0
denovo529	Bacteria; __Proteobacteria; __Gammaproteobacteria; __Enterobacterales; __Erwiniaceae; __Pantoea; __Pantoea vagans	Bacteria	__Proteobacteria	__Gammaproteobacteria	__Enterobacterales	__Erwiniaceae	__Pantoea	__Pantoea vagans	1	1	NR_116115.1	NA	NA	0	0	0	0	0	0	0	0	0	0	0	0	0	0	0	0	0	0	0	0	0	0	0	0	0	0	0	0	0	0	0	0	0	0	0	0
[truncated: 30 more columns]
