# Supplementary material for: Microbiota identified from preserved Anopheles
Source: Malar J. 2021 May 22;20:230. doi: 10.1186/s12936-021-03754-7 (PMC8141131; doi:10.1186/s12936-021-03754-7)
Supplement: Supplementary file 3 — Additional file 3. Diversity indices calculated in this study. Diversity indices were calculated for all replicates and average values were calculated per sex, species, preservative, preservation time period, condition (fresh vs preserved), and technique. The following indices were calculated: (A) Shannon-Wiener (H), (B) Simpson’s reciprocal (1/D), and (C) Pielou’s evenness (E). [file 12936_2021_3754_MOESM3_ESM.xlsx]

## Sheet: Diversity Indices
Index	Technique	Condition	Preservation Time Period	Preservative	Species	Sex	Replicate 1	Replicate 2	Replicate 3	Average
Shannon-Wiener (H)	Culture-dependent	Fresh	N/A	N/A	An. arabiensis	Female	1.09087	1.11749	0.529706	0.912687
						Male	1.34569	0.651757	0.639032	0.878827
					An. funestus	Female	0.93477	0.562335	0.693147	0.730084
						Male	0.940448	0	1.38629	0.775581
		Preserved	4 weeks	Silica	An. arabiensis	Female	1.29455	1.14906	1.27703	1.24021
						Male	1.35178	1.32089	1.55958	1.41075
					An. funestus	Female	0.693147	0	1.27703	0.656727
						Male	1.32966	0.636514	0.562335	0.842837
				RNAlater®	An. arabiensis	Female	0	0	0	0
						Male	0.450561	0.636514	0	0.362358
					An. funestus	Female	0.562335	0	0	0.187445
						Male	0	0.636514	0	0.212171
			12 weeks	Silica	An. arabiensis	Female	0.562335	0.562335	0.562335	0.562335
						Male	0.950271	1.0114	0.693147	0.884941
					An. funestus	Female	0.867563	0.450561	0	0.439375
						Male	0	0	0.562335	0.187445
				RNAlater®	An. arabiensis	Female	0	0.636514	0.693147	0.44322
						Male	0.636514	0	0	0.212171
					An. funestus	Female	0.636514	0	0.562335	0.399616
						Male	0.693147	0.562335	0	0.418494
	Culture-independent	Fresh	N/A	N/A	An. arabiensis	Female	1.004	0.730049	2.03857	1.25754
						Male	1.62686	1.38058	1.14217	1.38321
					An. funestus	Female	0.852552	0.865285	0.496276	0.738038
						Male	0.981388	1.05506	1.38123	1.13923
		Preserved	4 weeks	Silica	An. arabiensis	Female	1.12049	0.0162042	0.0289252	0.388541
						Male	0.459426	1.09312	0.986043	0.846197
					An. funestus	Female	1.6321	0.860173	1.42926	1.30718
						Male	4.25174	0.0428393	0.757682	1.68409
				RNAlater®	An. arabiensis	Female	2.65856	3.05068	2.32419	2.67781
						Male	2.99669	2.78692	3.16103	2.98154
					An. funestus	Female	2.09393	0.71096	4.57208	2.45899
						Male	0.248899	0.0989994	0.0295867	0.125828
			12 weeks	Silica	An. arabiensis	Female	0.959626	1.76417	2.25714	1.66031
						Male	1.49675	1.69639	2.67419	1.95578
					An. funestus	Female	1.4061	1.39279	2.03238	1.61042
						Male	1.49675	1.69639	2.67419	1.95578
				RNAlater®	An. arabiensis	Female	3.64792	2.57085	2.33384	2.85087
						Male	2.0031	2.5431	4.4955	3.0139
					An. funestus	Female	1.97189	3.15644	0.405605	1.84464
						Male	3.1867	4.49757	3.42781	3.70403
Simpson's Reciprocal (1/D)	Culture-dependent	Fresh	N/A	N/A	An. arabiensis	Female	2.4355	2.65574	1.5283	2.20651
						Male	2.90531	1.84906	1.51515	2.08984
					An. funestus	Female	2.37255	1.6	2	1.99085
						Male	1.92308	1	3.2	2.04103
		Preserved	4 weeks	Silica	An. arabiensis	Female	3.45714	2.6129	3.26667	3.11224
						Male	3.76923	3.55556	4.57143	3.9654
					An. funestus	Female	2	1	3.26667	2.08889
						Male	3.6	1.8	1.6	2.33333
				RNAlater®	An. arabiensis	Female	0	1	0	0.333333
						Male	1	1.8	2	1.6
					An. funestus	Female	1.6	1	1	1.2
						Male	0	1.8	1	0.933333
			12 weeks	Silica	An. arabiensis	Female	1.6	1.6	1.6	1.6
						Male	2.27273	2.57143	2	2.28139
					An. funestus	Female	2	1.38462	1	1.46154
						Male	1	1	1.6	1.2
				RNAlater®	An. arabiensis	Female	1.38462	1.8	1	1.39487
						Male	1.8	1	1	1.26667
					An. funestus	Female	1.8	1	1.6	1.46667
						Male	2	1.6	0	1.2
	Culture-independent	Fresh	N/A	N/A	An. arabiensis	Female	1.49055	1.40071	3.28788	2.05971
						Male	2.82335	2.21553	1.91736	2.31875
					An. funestus	Female	1.54847	1.50084	1.17597	1.40843
						Male	1.79501	2.01905	1.99639	1.93681
		Preserved	4 weeks	Silica	An. arabiensis	Female	1.97323	1.00242	1.00457	1.32674
						Male	1.19626	2.01325	1.62896	1.61283
					An. funestus	Female	2.63493	1.53694	2.11704	2.09631
						Male	9.16761	1.00768	1.41841	3.86457
				RNAlater®	An. arabiensis	Female	4.07129	4.76763	2.18405	3.67432
						Male	3.92443	4.07829	4.10542	4.03605
					An. funestus	Female	2.95425	1.21095	11.387	5.18406
						Male	1.04677	1.01892	1.00495	1.02355
			12 weeks	Silica	An. arabiensis	Female	1.38598	2.75582	3.7332	2.625
						Male	1.95282	2.36574	4.10757	2.80871
					An. funestus	Female	1.77421	1.57457	2.43006	1.92628
						Male	1.95282	2.36574	4.10757	2.80871
				RNAlater®	An. arabiensis	Female	6.8929	3.01014	2.78747	4.23017
						Male	2.4921	3.5021	9.94272	5.31231
					An. funestus	Female	1.88803	4.02537	1.09445	2.33595
						Male	4.79682	9.60422	4.82541	6.40882
Pielou's Evenness (E)	Culture-dependent	Fresh	N/A	N/A	An. arabiensis	Female	0.608823	0.806099	0.764205	0.726376
						Male	0.647142	0.940286	0.581672	0.723033
					An. funestus	Female	0.850864	0.811278	1	0.887381
						Male	0.67839	0	0.861353	0.513248
		Preserved	4 weeks	Silica	An. arabiensis	Female	0.933817	0.828871	0.921185	0.894625
						Male	0.975106	0.95282	0.969022	0.965649
					An. funestus	Female	1	0	0.921185	0.640395
						Male	0.959148	0.918296	0.811278	0.896241
				RNAlater®	An. arabiensis	Female	0	0	0	0
						Male	0.650022	0.918296	0	0.522773
					An. funestus	Female	0.811278	0	0	0.270426
						Male	0	0.918296	0	0.306099
			12 weeks	Silica	An. arabiensis	Female	0.811278	0.811278	0.811278	0.811278
						Male	0.864974	0.92062	1	0.928531
					An. funestus	Female	0.78969	0.650022	0	0.479904
						Male	0	0	0.811278	0.270426
				RNAlater®	An. arabiensis	Female	0	0.918296	1	0.639432
						Male	0.918296	0	0	0.306099
					An. funestus	Female	0.918296	0	0.811278	0.576525
						Male	1	0.811278	0	0.603759
	Culture-independent	Fresh	N/A	N/A	An. arabiensis	Female	0.329773	0.293793	0.611778	0.411782
						Male	0.534357	0.394846	0.411951	0.447051
					An. funestus	Female	0.332386	0.305408	0.18805	0.275281
						Male	0.339537	0.411339	0.391687	0.380854
		Preserved	4 weeks	Silica	An. arabiensis	Female	0.336262	0.0048629	0.00868051	0.116602
						Male	0.130283	0.309986	0.279621	0.239963
					An. funestus	Female	0.466781	0.246009	0.408767	0.373852
						Male	0.957027	0.00964273	0.170547	0.379072
				RNAlater®	An. arabiensis	Female	0.527133	0.604882	0.460835	0.53095
						Male	0.597273	0.555464	0.630028	0.594255
					An. funestus	Female	0.442112	0.150112	0.965348	0.519191
						Male	0.0646466	0.0257131	0.00768457	0.0326814
			12 weeks	Silica	An. arabiensis	Female	0.237352	0.436346	0.558278	0.410659
						Male	0.329442	0.373383	0.588602	0.430475
					An. funestus	Female	0.3165	0.313504	0.457471	0.362492
						Male	0.324315	0.367572	0.579441	0.423776
				RNAlater®	An. arabiensis	Female	0.787083	0.554692	0.503556	0.61511
						Male	0.40535	0.514627	0.909718	0.609898
					An. funestus	Female	0.42199	0.675489	0.0868008	0.39476
						Male	0.631853	0.89177	0.679658	0.734427
