# Supplementary material for: Microbiota identified from preserved Anopheles
Source: Malar J. 2021 May 22;20:230. doi: 10.1186/s12936-021-03754-7 (PMC8141131; doi:10.1186/s12936-021-03754-7)
Supplement: Supplementary file 10 — Additional file 10. Bacteria identified from female and male Anopheles funestus. Bacteria were identified from fresh mosquitoes, as well as mosquitoes preserved for 4 and 12 weeks, using culture-dependent (*) and culture-independent bacterial identification. Bacteria are recorded for all replicates (R). Bacteria indistinguishable by MALDI-TOF MS include 1A. hydrophila and A. veronii; 2C. propinquum and C. pseudodiphtheriticum; 3D. acidovorans and D. tsuruhatensis; 4E. anophelis, E. meningoseptica, and E. miricola; 5E. coli and E. fergusonii; 6K. oxytoca, R. ornithinolytica, R. planticola, and R. terrigena; and 7S. fonticola and S. oryzae. [file 12936_2021_3754_MOESM10_ESM.xlsx]

## Sheet: Sheet1
Bacteria	Females																														Males
	Fresh						4 weeks of Preservation												12 weeks of Preservation												Fresh						4 weeks of Preservation												12 weeks of Preservation
	Culture-dependent			Culture-independent			Culture-dependent						Culture-independent						Culture-dependent						Culture-independent						Culture-dependent			Culture-independent			Culture-dependent						Culture-independent						Culture-dependent
							Silica			RNAlater®			Silica			RNAlater®			Silica			RNAlater®			Silica			RNAlater®									Silica			RNAlater®			Silica			RNAlater®			Silica
	1	2	3	1	2	3	1	2	3	1	2	3	1	2	3	1	2	3	1	2	3	1	2	3	1	2	3	1	2	3	1	2	3	1	2	3	1	2	3	1	2	3	1	2	3	1	2	3	1
Abiotrophia defectiva*																									x	x				x
Acetobacter suratthaniensis																		x																		x										x
Acetobacterium carbinolicum
Achromobacter animicus
Acidibacter ferrireducens																																											x
Acinetobacter baumannii*
Acinetobacter dispersus
Acinetobacter johnsonii*																		x																		x							x			x
Acinetobacter junii*																									x	x		x	x	x																x
Acinetobacter lwoffii*																		x							x											x							x			x
Acinetobacter pittii*																		x																		x							x			x
Acinetobacter schindleri*
Acinetobacter seohaensis																																				x
Acinetobacter ursingii*																												x
Actinomyces bowdenii*																		x
Actinomyces israelii*
Actinomyces oris*																	x								x			x
Actinomyces polynesiensis																																											x
Aeromonas hydrophila* 1	x					x										x	x								x	x	x	x	x	x		x		x	x											x	x
Aerosakkonema funiforme																x	x	x							x	x	x	x	x	x													x				x
Aggregatibacter segnis																		x
Alloprevotella rava																x		x																									x
Amaricoccus kaplicensis																		x
Aminobacter niigataensis																x																													x
Anaerococcus nagyae																		x
Anaerococcus octavius*																x													x	x
Anaerococcus prevotii*																x									x	x				x
Anaerococcus provencensis																x												x
Anaerofilum pentosovorans																																											x
Anaerostipes hadrus																																											x
Anoxybacillus flavithermus
Anoxybacillus tepidamans																									x
Aquabacter spiritensis																												x	x
Aquabacterium parvum																		x																												x
Aquincola tertiaricarbonis*																																													x
Aquisphaera giovannonii
Arcticibacter pallidicorallinus																											x
Arthrobacter gandavensis*																												x	x
Asaia krungthepensis					x								x			x	x	x							x	x	x	x	x	x						x							x			x
Atopostipes suicloacalis																x	x
Bacillus cavernae
Bacillus coagulans*
Bacillus hisashii																									x
Bacillus infernus																																														x
Bacillus loiseleuriae																											x
Bacillus wiedmannii
Bacteriovorax stolpii
Bacteroides faecichinchillae
Bdellovibrio bacteriovorus
Belnapia soli
Bergeyella porcorum
Bifidobacterium pseudocatenulatum*
Blastocatella fastidiosa																																											x
Blastococcus aggregatus																												x		x
Bosea robiniae																											x																x
Brachybacterium faecium*																									x																		x
Bradyrhizobium namibiense																											x																			x
Brevibacillus laterosporus*
Brevibacterium paucivorans*																												x
Brevundimonas albigilva																x	x	x							x			x		x													x
Brevundimonas lenta
Brucella ovis																																													x
Burkholderia ambifaria*																																											x
Caenispirillum bisanense																																				x
Calidifontibacter indicus																												x
Caryophanon latum																													x
Casaltella massiliensis																									x
Caulobacter mirabilis																													x
Cedecea lapagei*							x		x	x						x	x	x						x			x	x			x
Cedecea neteri*									x	x
Cellulosilyticum lentocellum																x
Chelatococcus composti
Chryseobacterium aquifrigidense																		x
Chryseobacterium arthrosphaerae																													x							x
Chryseobacterium gleum*		x																																			x
Chryseobacterium greenlandense																x									x	x	x			x													x					x
Chryseobacterium profundimaris																																											x
Chryseobacterium reticulitermitis
Chryseobacterium taklimakanense																x
Chthoniobacter flavus																		x
Cloacibacterium normanense
Clostridium saccharoperbutylacetonicum																																											x
Clostridium saudiense																												x
Conexibacter arvalis
Corynebacterium amycolatum*																x	x
Corynebacterium appendicis*																	x									x		x	x	x
Corynebacterium aurimucosum*					x											x	x								x	x		x
Corynebacterium crudilactis
Corynebacterium durum*																		x												x
Corynebacterium falsenii*																											x																x
Corynebacterium glaucum*																		x
Corynebacterium gottingense																	x	x							x	x		x	x	x
Corynebacterium jeikeium*																													x
Corynebacterium kroppenstedtii*																		x										x		x
Corynebacterium otitidis																												x
Corynebacterium pollutisoli																												x	x
Corynebacterium pseudodiphtheriticum* 2																x		x	x						x					x						x							x			x
Corynebacterium riegelii*																	x											x
Corynebacterium sundsvallense*																																											x
Corynebacterium testudinoris*																													x
Corynebacterium tuberculostearicum*																x		x							x	x	x	x								x							x
Corynebacterium ureicelerivorans*																x		x							x	x		x		x
Curvibacter fontanus																		x
Cutibacterium acnes						x										x	x	x							x	x	x	x	x	x						x							x	x		x	x
Deinococcus taklimakanensis																x									x			x	x	x
Deinococcus xinjiangensis																x												x	x
Delftia tsuruhatensis 3																		x																		x							x			x
Desemzia incerta
Dialister propionicifaciens
Dolosigranulum pigrum																x		x							x			x		x						x							x
Elizabethkingia anophelis 4				x	x	x	x	x						x		x	x								x	x	x	x	x	x			x	x	x			x						x			x	x
Empedobacter falsenii																		x																		x							x			x
Enterobacter cloacae*				x	x	x							x	x	x	x	x	x							x	x	x	x	x	x				x	x	x							x			x	x	x
Enterococcus cecorum*																	x								x
Escherichia fergusonii* 5																																											x
Ewingella americana*																			x														x
Facklamia hominis*																	x
Finegoldia magna*																									x	x	x	x
Flavobacterium zhairuonensis																												x
Flectobacillus roseus
Fontimonas thermophila																		x
Frateuria aurantia																											x
Fusobacterium nucleatum*																																											x
Gallicola barnesae
Gellertiella hungarica
Gemella taiwanensis																		x																		x							x
Gemmatirosa kalamazoonesis																										x
Geobacillus stearothermophilus*
Georgenia deserti																									x																		x
Gilliamella apicola
Gluconobacter frateurii				x														x							x	x	x	x								x							x				x
Gluconobacter japonicus																											x
Gordonia otitidis																		x
Granulicatella adiacens*																									x			x
Granulicatella elegans*																x
Haemophilus haemolyticus*																		x							x	x		x
Haemophilus parahaemolyticus*
Haemophilus parainfluenzae*																x									x		x	x															x			x
Hafnia psychrotolerans					x								x														x
Herbaspirillum huttiense*																x	x								x	x	x	x	x	x				x										x			x
Hydrogenophaga carboriunda																		x
Ilumatobacter fluminis																													x
Ilyomonas limi																										x
Intestinimonas butyriciproducens
Isoptericola cucumis																																											x
Kaistia terrae				x														x
Kineococcus xinjiangensis																													x
Kineosporia rhizophila																											x
Kineothrix alysoides																		x
Kocuria palustris*																		x							x	x				x
Krasilnikoviella muralis
Kytococcus sedentarius*																												x
Lacibacterium aquatile																													x
Lacisediminimonas profundi																												x
Lactobacillus acetotolerans
Lactobacillus aquaticus
Lactobacillus coryniformis*																																				x
Lactobacillus crispatus*																x		x									x	x	x	x						x							x
Lactobacillus iners*																									x
Lactobacillus ingluviei*																													x
Lactobacillus mellis
Lactobacillus rodentium
Lactococcus lactis*																		x																									x
Lapillicoccus jejuensis																x																											x
Lawsonella clevelandensis																x		x							x			x	x	x													x			x
Leminorella grimontii*
Leptotrichia buccalis																x	x								x
Leptotrichia goodfellowii*
Leptotrichia shahii																												x
Leucobacter iarius															x	x	x	x							x	x	x	x	x	x						x							x			x	x
Leuconostoc mesenteroides*																									x																						x
Longimicrobium terrae																													x
Lysobacter oculi
Marmoricola scoriae																																											x
Massilia suwonensis																									x			x								x							x			x
Mediterranea massiliensis																		x
Megamonas funiformis																											x
Methylobacterium bullatum																													x
Methylobacterium phyllostachyos																												x
Methyloceanibacter caenitepidi
Methylorubrum populi																											x
Microbacterium maritypicum*				x		x										x	x	x							x	x	x	x	x	x				x									x				x
Micrococcus luteus*																x		x							x			x		x													x
Microvirga brassicacearum																																														x
Moraxella nonliquefaciens*																		x
Moraxella osloensis*														x		x	x	x								x		x	x	x													x				x
Moraxella porci
Morganella morganii*																									x
Murdochiella massiliensis
Muribaculum intestinale
Mycobacterium florentinum
Mycolicibacterium iranicum																												x
Nakamurella flavida																													x
Neisseria mucosa*																x										x				x													x
Nocardia coeliaca
Nocardioides glacieisoli																												x
Nocardioides halotolerans
Nocardioides iriomotensis																		x
Nocardioides islandensis
Nocardioides solisilvae																											x
Nordella oligomobilis
Oblitimonas alkaliphila
Olegusella massiliensis																																											x
Oribacterium sinus																												x
Other					x											x	x	x							x	x	x		x	x				x		x							x			x	x
Paenibacillus silvae																										x
Paludibaculum fermentans
Pantoea vagans
Paracoccus aerius																												x	x	x						x							x			x
Paracoccus hibiscisoli																x									x			x	x														x			x
Parviterribacter multiflagellatus																	x
Pedobacter solisilvae																		x																	x												x
Pedobacter trunci																											x
Pedomicrobium ferrugineum																													x
Pelomonas saccharophila*																											x
Peptococcus niger*
Peptoniphilus asaccharolyticus*
Peptoniphilus coxii*																												x
Peptoniphilus lacydonensis																		x
Peptostreptococcus stomatis																		x
Peredibacter starrii
Phenylobacterium aquaticum																	x
Phenylobacterium muchangponense
Phreatobacter oligotrophus																														x
Phyllobacterium endophyticum																x																													x
Phyllobacterium myrsinacearum				x									x	x	x	x	x								x	x	x	x	x	x				x									x	x	x		x	x
Porphyromonas catoniae*																		x
Porphyromonas pasteri																																											x
Prevotella bivia*																									x	x
Prevotella corporis*
Prevotella melaninogenica*																																											x
Prevotella nanceiensis*																																											x
Prevotella shahii*
Prevotella stercorea*																																											x
Prevotella timonensis*																													x
Providencia vermicola*																												x
Pseudomonas aeruginosa*																x		x										x								x
Pseudomonas chengduensis													x		x
Pseudomonas deceptionensis
Pseudomonas geniculata				x		x							x	x	x	x	x								x	x	x	x	x	x				x										x			x	x
Pseudomonas grimontii*					x								x	x	x
Pseudomonas lactis													x		x			x										x	x							x							x			x
Pseudomonas marginalis*													x		x
Pseudomonas orientalis*													x		x
Pseudomonas putida*																																	x
Pseudomonas savastanoi*					x								x	x	x
Pseudomonas soli
Pseudomonas stutzeri*
Pseudomonas veronii*				x	x	x							x	x	x	x	x								x	x	x	x	x	x				x	x									x	x		x	x
Pseudomonas xiamenensis
Pseudonocardia oroxyli
Pseudonocardia yuanmonensis																													x														x
Pseudoxanthomonas taiwanensis
Psychrobacter cibarius																	x
Psychrobacter faecalis																x	x								x	x	x	x	x	x				x										x			x
Rahnella aquatilis*																				x		x
Raoultella ornithinolytica* 6			x		x				x										x	x	x	x	x	x											x		x		x										x
Rhizobium azooxidifex
Rhizobium daejeonense
Rhizobium endophyticum																x		x												x						x							x
Rhizobium zeae
Rhodococcus pedocola																													x
Rhodococcus sovatensis																x		x							x		x	x	x	x													x					x
Rhodoferax antarcticus																																													x
Rhodovulum kholense
Robbsia andropogonis																										x										x							x
Romboutsia timonensis																														x
Rosenbergiella epipactidis																																											x
Roseomonas aquatica																																														x
Roseomonas gilardii																x	x
Rothia dentocariosa*						x										x	x								x	x	x	x	x
Rothia mucilaginosa*																		x										x															x
Rubellimicrobium rubrum
Rubrobacter spartanus																													x
Ruminococcus champanellensis
Ruminococcus gnavus*																											x
Saccharothrix ghardaiensis																												x
Sandaracinus amylolyticus
Schaalia odontolytica																																											x
Schlegelella aquatica
Serratia liquefaciens*																																													x
Serratia marcescens*																											x	x								x							x
Serratia oryzae 7	x	x		x	x	x							x	x	x	x	x								x	x	x	x	x	x	x		x	x	x	x	x						x	x	x	x	x	x
Shinella curvata																x
Snodgrassella alvi																												x
Solobacterium moorei*																		x
Sphaerobacter thermophilus																										x			x
Sphingomonas fennica																																											x
Sphingomonas kyeonggiensis																												x															x
Sphingomonas olei																									x
Sphingomonas palustris
Sphingomonas rhizophila
Sphingorhabdus rigui
Spirosoma horti																x
Staphylococcus capitis*																															x										x
Staphylococcus epidermidis*			x									x				x	x	x							x	x	x	x	x	x	x			x		x	x	x				x	x			x		x
Staphylococcus hominis*	x																																x					x			x
Stenotrophobacter terrae
Stenotrophomonas maltophilia*															x
Stenotrophomonas pavanii													x		x
Stenotrophomonas rhizophila*																																				x							x			x
Streptococcus agalactiae*																									x
Streptococcus periodonticum																x	x	x							x	x		x	x														x			x
Streptococcus sinensis*
Streptococcus thermophilus																x	x	x									x	x	x	x						x							x			x
Streptomyces xanthophaeus
Streptosporangium jiaoheense																												x
Tepidimonas fonticaldi																	x
Thermicanus aegyptius
Thermoanaerobaculum aquaticum
Variovorax boronicumulans																																														x
Variovorax paradoxus*													x		x	x	x								x	x	x			x															x		x
Veillonella dispar*																	x								x	x		x															x
Veillonella montpellierensis*																		x
Vicinamibacter silvestris																		x
Vogesella mureinivorans
Yersinia aldovae*					x								x			x	x								x	x	x	x	x	x				x	x	x										x
Yersinia enterocolitica*				x	x	x							x	x	x													x						x	x									x
Yersinia entomophaga															x
Yersinia wautersii																																		x	x
Zhizhongheella caldifontis
Zoogloea resiniphila																												x
[truncated: 11 more columns]
